# Supplementary material
Source: publisher figshare collection journal article supplement (https://frontiersin.figshare.com/ndownloader/files/27671973)
Supplement: Supplementary file 1 [file 27671973]

## Sheet: Sheet1
			Status	1st Correction							2nd Correction							3rd Correction							4th Correction						5th Correction								4th Correction
S.No	Date	Article ID	Status	Time of Correction	Proof Reader Name	Paginator Name	Correction Count	Correction Done by	Start Time	Completed Time	Time of Correction	Proof Reader Name	Paginator Name	Correction Count	Correction Done by	Start Time	Completed Time	Time of Correction	Proof Reader Name	Paginator Name	Correction Count	Correction Done by	Start Time	Completed Time	Time of Correction	Proof Reader Name	Paginator Name	Correction Count	Correction Done by	Start Time	Time of Correction	Proof Reader Name	Paginator Name	Correction Count	Correction Done by	Start Time	Completed Time	Date	Completed Time	Cor Date
1	2021-01-25	fvets-07-632476	Cor inprocess	20:16:51	Devilakshmi R	SenthilKumar P	2																															25-Jan-2021		00-Jan-1900
1	2021-02-08	fmars-08-630517	Cor inprocess	08:02:33	Devilakshmi R	Sridhar G	1																															08-Feb-2021		00-Jan-1900
1	2021-02-16	fmars-08-630517	Cor inprocess	15:07:30	Sathya R	Saravanavel Murugan P	5	Gowtham M	2021-02-16 15:26:41																													16-Feb-2021		16-Feb-2021
1	2021-03-16	fpsyg-12-644096	Completed	12:33:49	Manoj B	Janani M	10																															16-Mar-2021		00-Jan-1900
1	2021-03-17	fimmu-12-638010	Completed	00:02:58	Buvanenthiran P	Saravanavel Murugan P	2	Santhosh Kumar L	2021-03-17 00:03:20	2021-03-17 00:13:42																												17-Mar-2021		17-Mar-2021
1	2021-03-17	fped-09-536730	Completed	00:04:49	Buvanenthiran P	Senthilkumar	2	Santhosh Kumar L	2021-03-17 00:13:47	2021-03-17 00:15:54																												17-Mar-2021		17-Mar-2021
1	2021-03-17	fmed-08-628843	Completed	00:12:06	Mahalingam K	Sumithra P	9	Santhosh Kumar L	2021-03-17 00:16:02	2021-03-17 00:19:14																												17-Mar-2021		17-Mar-2021
1	2021-03-17	fneur-12-642604	Completed	00:17:26	Gowrishankar S	Aswini M	6	Santhosh Kumar L	2021-03-17 00:19:28	2021-03-17 00:23:39																												17-Mar-2021		17-Mar-2021
2	2021-03-17	fped-09-656806	Completed	00:57:12	Gowrishankar S	Sarbudeen P	4	Santhosh Kumar L	2021-03-17 00:57:43	2021-03-17 00:59:37	01:18:22	Gowrishankar S	Sarbudeen P	1	Santhosh Kumar L	2021-03-17 01:19:13	2021-03-17 01:22:50																					17-Mar-2021		17-Mar-2021
1	2021-03-17	fimmu-12-641240	Completed	07:02:52	Gowthami L	Muthu Kumar M	1	Divya V	2021-03-17 07:32:11	2021-03-17 07:57:52																												17-Mar-2021		17-Mar-2021
1	2021-03-17	fgene-12-649959	Completed	07:11:14	Uma Y	Saravanavel Murugan P	5	Maheswari D	2021-03-17 07:55:42	2021-03-17 08:04:10																												17-Mar-2021		17-Mar-2021
1	2021-03-17	fmars-08-618884	Completed	07:19:00	Gowthami L	Muthu Kumar M	5	Maheswari D	2021-03-17 07:39:28	2021-03-17 07:48:53																												17-Mar-2021		17-Mar-2021
1	2021-03-17	fmed-08-660367	Completed	07:20:12	Thomas S	Kalaivani R	5	Maheswari D	2021-03-17 07:51:20	2021-03-17 07:54:48																												17-Mar-2021		17-Mar-2021
1	2021-03-17	fnbot-15-625479	Completed	07:41:05	Thomas S	Nathiya S	5	Maheswari D	2021-03-17 08:04:23	2021-03-17 08:35:40																												17-Mar-2021		17-Mar-2021
1	2021-03-17	ftox-03-636976	Completed	08:05:10	Gowthami L	Muthu Kumar M	1	Maheswari D	2021-03-17 08:35:50	2021-03-17 08:44:34																												17-Mar-2021		17-Mar-2021
1	2021-03-17	fpubh-09-658876	Completed	08:14:13	Thomas S	Sridhar G	5	Maheswari D	2021-03-17 08:38:59	2021-03-17 08:39:07																												17-Mar-2021		17-Mar-2021
1	2021-03-17	fpsyg-12-607152	Completed	08:14:26	Prakash A	Aswini M	5	Divya V	2021-03-17 09:06:42	2021-03-17 12:25:12																												17-Mar-2021		17-Mar-2021
1	2021-03-17	fpsyt-12-613156	Completed	08:26:25	Muthulakshmi R	Muthu Kumar M	3	Divya V	2021-03-17 09:48:37	2021-03-17 09:57:35																												17-Mar-2021		17-Mar-2021
1	2021-03-17	fsoc-06-611356	Completed	08:35:45	Dinesh Kumar M	Janani M	2	Divya V	2021-03-17 08:40:19	2021-03-17 09:16:35																												17-Mar-2021		17-Mar-2021
1	2021-03-17	fneur-12-647296	Completed	08:44:20	Uma Y	Saravanavel Murugan P	10	Maheswari D	2021-03-17 08:53:42	2021-03-17 09:23:52																												17-Mar-2021		17-Mar-2021
1	2021-03-17	fspor-03-622120	Completed	08:55:42	Dinesh Kumar M	Sarbudeen P	2	Divya V	2021-03-17 09:57:48	2021-03-17 10:09:34																												17-Mar-2021		17-Mar-2021
1	2021-03-17	fmed-08-556776	Completed	08:56:38	Gowthami L	Sumithra P	4	Maheswari D	2021-03-17 09:24:08	2021-03-17 09:27:30																												17-Mar-2021		17-Mar-2021
1	2021-03-17	fonc-11-607989	Completed	09:10:18	Muthulakshmi R	Muthu Kumar M	3	Divya V	2021-03-17 09:52:21	2021-03-17 11:57:14																												17-Mar-2021		17-Mar-2021
1	2021-03-17	fcell-09-552549	Completed	09:20:36	Gowthami L	Sumithra P	2	Maheswari D	2021-03-17 10:24:31	2021-03-17 10:30:31																												17-Mar-2021		17-Mar-2021
1	2021-03-17	fvets-08-629410	Completed	09:35:53	Dinesh Kumar M	Durga B	2	Divya V	2021-03-17 10:41:53	2021-03-17 11:33:06																												17-Mar-2021		17-Mar-2021
1	2021-03-17	frobt-08-625094	Completed	09:37:29	Uma Y	Saravanavel Murugan P	5	Maheswari D	2021-03-17 11:01:46	2021-03-17 11:55:36																												17-Mar-2021		17-Mar-2021
1	2021-03-17	fpsyg-12-611630	Completed	09:40:07	Prakash A	Aswini M	5	Divya V	2021-03-17 10:16:18	2021-03-17 10:36:19																												17-Mar-2021		17-Mar-2021
1	2021-03-17	fmed-08-642710	Completed	09:45:06	Gowthami L	Sumithra P	5	Maheswari D	2021-03-17 09:56:12	2021-03-17 10:09:54																												17-Mar-2021		17-Mar-2021
2	2021-03-17	fmed-08-640460	Completed	09:53:41	Ajith L	Nathiya S	1	Divya V	2021-03-17 11:13:37	2021-03-17 11:44:28	13:41:49	Ajith L	Nathiya S	1	Gowtham M	2021-03-17 14:21:59	2021-03-17 14:26:09																					17-Mar-2021		17-Mar-2021
1	2021-03-17	fcvm-08-658726	Completed	09:57:21	Uma Y	Saravanavel Murugan P	2	Maheswari D	2021-03-17 12:03:57	2021-03-17 12:11:13																												17-Mar-2021		17-Mar-2021
1	2021-03-17	fnagi-13-643132	Completed	10:04:36	Gowthami L	Sumithra P	4	Maheswari D	2021-03-17 10:34:11	2021-03-17 10:46:56																												17-Mar-2021		17-Mar-2021
1	2021-03-17	fcvm-08-645693	Completed	10:07:47	Gowthami L	Sumithra P	1	Maheswari D	2021-03-17 10:47:07	2021-03-17 10:49:26																												17-Mar-2021		17-Mar-2021
2	2021-03-17	fmed-08-653994	Completed	10:11:54	Ajith L	Durga B	4	Divya V	2021-03-17 11:14:32	2021-03-17 12:04:27	13:48:18	Ajith L	Durga B	1	Gowtham M	2021-03-17 14:26:18	2021-03-17 14:31:50																					17-Mar-2021		17-Mar-2021
1	2021-03-17	fvets-08-648766	Completed	10:30:51	Muthulakshmi R	Muthu Kumar M	5	Divya V	2021-03-17 13:32:44	2021-03-17 14:44:34																												17-Mar-2021		17-Mar-2021
2	2021-03-17	fnbot-15-639001	Completed	10:34:05	Thomas S	Sumithra P	5	Maheswari D	2021-03-17 11:56:14	2021-03-17 11:59:05	21:08:28	Thomas S	Sumithra P	5	Maheswari D	2021-03-18 07:10:21	2021-03-18 07:10:27																					17-Mar-2021		17-Mar-2021
1	2021-03-17	fmed-08-662045	Completed	10:34:52	Ajith L	Muthu Kumar M	3	Divya V	2021-03-17 13:39:27	2021-03-17 14:30:13																												17-Mar-2021		17-Mar-2021
1	2021-03-17	fncel-15-639754	Completed	10:47:25	Thomas S	Sridhar G	5	Maheswari D	2021-03-17 11:59:45	2021-03-17 12:03:32																												17-Mar-2021		17-Mar-2021
1	2021-03-17	feart-09-617662	Completed	10:49:42	Uma Y	Saravanavel Murugan P	5	Maheswari D	2021-03-17 12:35:10	2021-03-17 12:54:07																												17-Mar-2021		17-Mar-2021
1	2021-03-17	fpsyg-12-658599	Completed	10:51:09	Prakash A	Sarbudeen P	3	Divya V	2021-03-17 11:57:31	2021-03-17 12:13:33																												17-Mar-2021		17-Mar-2021
1	2021-03-17	fvets-08-659786	Completed	11:07:12	Muthulakshmi R	Muthu Kumar M	5	Divya V	2021-03-17 13:11:07	2021-03-17 13:36:54																												17-Mar-2021		17-Mar-2021
2	2021-03-17	fnagi-13-648662	Completed	11:26:47	Ajith L	Janani K	5	Divya V	2021-03-17 13:47:22	2021-03-17 14:44:57	14:51:19	Ajith L	Janani K	1	Gowtham M	2021-03-17 14:58:30	2021-03-17 15:03:08																					17-Mar-2021		17-Mar-2021
1	2021-03-17	fneur-12-614382	Completed	11:31:38	Gowthami L	Gopala Krishnan R	4	Maheswari D	2021-03-17 12:11:31	2021-03-17 12:18:06																												17-Mar-2021		17-Mar-2021
1	2021-03-17	fneur-12-638574	Completed	11:44:04	Muthulakshmi R	Muthu Kumar M	3	Divya V	2021-03-17 12:42:48	2021-03-17 13:15:44																												17-Mar-2021		17-Mar-2021
1	2021-03-17	fpsyg-12-653011	Completed	11:46:10	Prakash A	Kalaivani R	5	Divya V	2021-03-17 12:04:51	2021-03-17 12:19:16																												17-Mar-2021		17-Mar-2021
1	2021-03-17	fmed-08-643973	Completed	11:49:25	Renganath K	Sridhar G	10	Maheswari D	2021-03-17 12:18:22	2021-03-17 12:25:25																												17-Mar-2021		17-Mar-2021
1	2021-03-17	fpls-12-643258	Completed	12:12:39	Dinesh Kumar M	Aswini M	2	Divya V	2021-03-17 13:14:42	2021-03-17 13:14:49																												17-Mar-2021		17-Mar-2021
1	2021-03-17	fpsyg-12-636919	Completed	12:16:23	Prakash A	Sridhar G	5	Santhosh Kumar L	2021-03-17 14:37:28	2021-03-17 14:39:39																												17-Mar-2021		17-Mar-2021
1	2021-03-17	fcvm-08-644405	Completed	12:17:17	Gowthami L	Saravanavel Murugan P	5	Maheswari D	2021-03-17 12:25:37	2021-03-17 14:55:46																												17-Mar-2021		17-Mar-2021
1	2021-03-17	fpsyg-12-609232	Completed	12:24:40	Renganath K	Gopala Krishnan R	10	Maheswari D	2021-03-17 12:54:27	2021-03-17 13:00:12																												17-Mar-2021		17-Mar-2021
1	2021-03-17	fneur-12-630378	Completed	12:36:18	Ajith L	Divya A	4	Gowtham M	2021-03-17 14:03:46	2021-03-17 14:11:01																												17-Mar-2021		17-Mar-2021
1	2021-03-17	fimmu-12-652613	Completed	12:37:45	Renganath K	Sridhar G	10	Maheswari D	2021-03-17 13:00:26	2021-03-17 13:03:57																												17-Mar-2021		17-Mar-2021
1	2021-03-17	fpsyg-12-629456	Completed	12:42:03	Prakash A	Saravanavel Murugan P	2	Sanjay Kumar T	2021-03-17 14:27:14	2021-03-17 14:27:20																												17-Mar-2021		17-Mar-2021
1	2021-03-17	fneur-12-596006	Completed	12:55:26	Uma Y	Gopala Krishnan R	3	Maheswari D	2021-03-17 13:04:08	2021-03-17 13:45:00																												17-Mar-2021		17-Mar-2021
1	2021-03-17	fcvm-08-639727	Completed	12:56:38	Renganath K	Durga B	10	Maheswari D	2021-03-17 13:24:25	2021-03-17 13:29:03																												17-Mar-2021		17-Mar-2021
1	2021-03-17	fneur-12-633500	Completed	12:57:27	Ajith L	Saravanavel Murugan P	5	Gowtham M	2021-03-17 14:11:09	2021-03-17 14:16:25																												17-Mar-2021		17-Mar-2021
1	2021-03-17	fcvm-08-630399	Completed	13:04:20	Renganath K	Gopala Krishnan R	10	Maheswari D	2021-03-17 13:29:24	2021-03-17 13:38:17																												17-Mar-2021		17-Mar-2021
1	2021-03-17	fcvm-08-643900	Completed	13:11:07	Gowthami L	Durga B	5	Maheswari D	2021-03-17 13:45:16	2021-03-17 13:55:43																												17-Mar-2021		17-Mar-2021
1	2021-03-17	fped-09-649515	Completed	13:12:29	Amshaveni N	Divya A	2	Divya V	2021-03-17 14:58:58	2021-03-17 14:59:07																												17-Mar-2021		17-Mar-2021
1	2021-03-17	fimmu-12-639818	Completed	13:12:49	Dinesh Kumar M	SenthilKumar P	2	Divya V	2021-03-17 14:24:55	2021-03-17 14:52:41																												17-Mar-2021		17-Mar-2021
1	2021-03-17	fpsyt-12-559154	Completed	13:15:26	Renganath K	Durga B	10	Maheswari D	2021-03-17 13:55:57	2021-03-17 14:02:12																												17-Mar-2021		17-Mar-2021
1	2021-03-17	frym-09-633011	Completed	13:30:59	Muthulakshmi R	Nathiya S	5	Nathiya S	2021-03-17 13:49:04	2021-03-17 13:49:13																												17-Mar-2021		17-Mar-2021
1	2021-03-17	fneur-12-636330	Completed	13:37:39	Ajith L	Divya A	1	Gowtham M	2021-03-17 14:16:31	2021-03-17 14:21:39																												17-Mar-2021		17-Mar-2021
1	2021-03-17	fpsyt-12-566740	Completed	13:45:15	Gowthami L	Sumithra P	4	Maheswari D	2021-03-17 14:19:11	2021-03-17 14:20:20																												17-Mar-2021		17-Mar-2021
1	2021-03-17	fnut-08-615849	Completed	14:02:15	Uma Y	Muthu Kumar M	2	Maheswari D	2021-03-17 14:13:48	2021-03-17 14:16:59																												17-Mar-2021		17-Mar-2021
1	2021-03-17	fpsyg-12-635085	Completed	14:05:34	Renganath K	SenthilKumar P	10	Maheswari D	2021-03-17 14:20:32	2021-03-17 14:24:43																												17-Mar-2021		17-Mar-2021
1	2021-03-17	fmicb-12-650373	Completed	14:06:22	Siva Sankar Narayanan M	Saravanavel Murugan P	1	Santhosh Kumar L	2021-03-17 14:23:41	2021-03-17 14:24:29																												17-Mar-2021		17-Mar-2021
1	2021-03-17	fsurg-08-590245	Completed	14:12:16	Gowthami L	Janani M	5	Maheswari D	2021-03-17 14:26:40	2021-03-17 14:30:54																												17-Mar-2021		17-Mar-2021
1	2021-03-17	fimmu-12-613145	Completed	14:12:22	Siva Sankar Narayanan M	Saravanavel Murugan P	2	Santhosh Kumar L	2021-03-17 14:24:59	2021-03-17 14:26:15																												17-Mar-2021		17-Mar-2021
1	2021-03-17	fdmed-02-647417	Completed	14:15:06	Siva Sankar Narayanan M	Saravanavel Murugan P	2	Santhosh Kumar L	2021-03-17 14:26:22	2021-03-17 14:33:35																												17-Mar-2021		17-Mar-2021
1	2021-03-17	fpubh-09-611583	Completed	14:15:46	Sathya R	Saravanavel Murugan P	5	Gowtham M	2021-03-17 14:32:36	2021-03-17 14:44:16																												17-Mar-2021		17-Mar-2021
1	2021-03-17	fneur-12-638904	Completed	14:23:13	Priyadharshini S	Sridhar G	2	Gowtham M	2021-03-17 14:44:28	2021-03-17 14:50:04																												17-Mar-2021		17-Mar-2021
1	2021-03-17	fcvm-08-641062	Completed	14:31:59	Gowthami L	Saravanavel Murugan P	2	Maheswari D	2021-03-17 15:08:29	2021-03-17 15:08:37																												17-Mar-2021		17-Mar-2021
1	2021-03-17	fneur-12-649749	Completed	14:33:37	Sathya R	Divya A	3	Gowtham M	2021-03-17 14:50:15	2021-03-17 14:58:14																												17-Mar-2021		17-Mar-2021
1	2021-03-17	fneur-12-653167	Completed	14:59:04	Sathya R	SenthilKumar P	3	Gowtham M	2021-03-17 15:04:57	2021-03-17 15:18:20																												17-Mar-2021		17-Mar-2021
2	2021-03-17	fneur-12-648702	Completed	15:09:38	Jeyaseelan R	Nathiya S	4	Gowtham M	2021-03-17 15:45:23	2021-03-17 15:51:43	16:16:31	Jeyaseelan R	Nathiya S	2	Gowtham M	2021-03-17 17:05:17	2021-03-17 17:11:45																					17-Mar-2021		17-Mar-2021
1	2021-03-17	fpsyg-12-586318	Completed	15:22:26	Buvanenthiran P	Gopala Krishnan R	10	Santhosh Kumar L	2021-03-17 15:23:18	2021-03-17 15:36:57																												17-Mar-2021		17-Mar-2021
1	2021-03-17	fpls-12-621466	Completed	15:22:34	Priyadharshini S	Kalaivani R	10	Gowtham M	2021-03-17 16:17:32	2021-03-17 16:21:58																												17-Mar-2021		17-Mar-2021
1	2021-03-17	frma-06-655350	Completed	15:24:24	Siva Sankar Narayanan M	Kalaivani R	5	Santhosh Kumar L	2021-03-17 15:39:53	2021-03-17 15:54:27																												17-Mar-2021		17-Mar-2021
1	2021-03-17	fmed-08-653861	Completed	15:27:41	Jeyaseelan R	Saravanavel Murugan P	1	Gowtham M	2021-03-17 15:51:50	2021-03-17 15:59:11																												17-Mar-2021		17-Mar-2021
1	2021-03-17	fnins-15-644239	Completed	15:28:37	Sathya R	Sridhar G	5	Gowtham M	2021-03-17 16:30:26	2021-03-17 16:41:19																												17-Mar-2021		17-Mar-2021
1	2021-03-17	ftox-03-643804	Completed	15:37:26	Amshaveni N	Janani M	3	Santhosh Kumar L	2021-03-17 16:02:37	2021-03-17 16:06:00																												17-Mar-2021		17-Mar-2021
1	2021-03-17	fneur-12-625369	Completed	15:38:52	Amshaveni N	Janani K	2	Santhosh Kumar L	2021-03-17 16:08:24	2021-03-17 16:08:29																												17-Mar-2021		17-Mar-2021
1	2021-03-17	fonc-11-557477	Completed	15:46:44	Sathya R	Janani K	5	Gowtham M	2021-03-17 16:41:25	2021-03-17 17:03:43																												17-Mar-2021		17-Mar-2021
1	2021-03-17	fimmu-12-641307	Completed	15:59:30	Jeyaseelan R	Nathiya S	1	Gowtham M	2021-03-17 16:02:49	2021-03-17 16:17:00																												17-Mar-2021		17-Mar-2021
1	2021-03-17	fpubh-09-585517	Completed	16:16:24	Siva Sankar Narayanan M	Punniyamoorthy K	4	Santhosh Kumar L	2021-03-17 16:42:07	2021-03-17 16:46:03																												17-Mar-2021		17-Mar-2021
1	2021-03-17	fonc-11-637015	Completed	16:18:03	Gowrishankar S	Sridhar G	4	Santhosh Kumar L	2021-03-17 16:46:15	2021-03-17 16:49:44																												17-Mar-2021		17-Mar-2021
1	2021-03-17	fped-09-629824	Completed	16:18:53	Uma Y	Durga B	3	Gowtham M	2021-03-17 16:22:18	2021-03-17 16:30:07																												17-Mar-2021		17-Mar-2021
1	2021-03-17	fmed-08-625130	Completed	16:35:38	Mahalingam K	Janani M	7	Santhosh Kumar L	2021-03-17 16:52:06	2021-03-17 16:55:18																												17-Mar-2021		17-Mar-2021
1	2021-03-17	fpsyg-12-614842	Completed	16:43:09	Sathya R	Saravanavel Murugan P	3	Gowtham M	2021-03-17 18:30:42	2021-03-17 18:41:11																												17-Mar-2021		17-Mar-2021
1	2021-03-17	fneur-12-637620	Completed	16:47:05	Buvanenthiran P	Gopala Krishnan R	2	Santhosh Kumar L	2021-03-17 16:50:17	2021-03-17 16:51:47																												17-Mar-2021		17-Mar-2021
1	2021-03-17	fvets-08-607491	Completed	16:48:39	Amshaveni N	Janani M	5	Santhosh Kumar L	2021-03-17 16:56:22	2021-03-17 17:04:13																												17-Mar-2021		17-Mar-2021
1	2021-03-17	fpls-12-608732	Completed	16:54:54	Priyadharshini S	Muthu Kumar M	10	Gowtham M	2021-03-17 17:11:59	2021-03-17 17:44:02																												17-Mar-2021		17-Mar-2021
2	2021-03-17	fpsyg-12-620251	Completed	17:14:33	Sathya R	SenthilKumar P	3	Gowtham M	2021-03-17 18:41:18	2021-03-17 19:03:05	20:40:16	Sathya R	SenthilKumar P	2	Gowtham M	2021-03-17 20:46:47	2021-03-17 20:55:38																					17-Mar-2021		17-Mar-2021
1	2021-03-17	fpsyt-12-660432	Completed	17:32:37	Priyadharshini S	Divya A	10	Gowtham M	2021-03-17 18:07:58	2021-03-17 18:17:38																												17-Mar-2021		17-Mar-2021
1	2021-03-17	fspas-08-654879	Completed	17:34:08	Siva Sankar Narayanan M	Nathiya S	5	Santhosh Kumar L	2021-03-17 18:11:36	2021-03-17 18:36:49																												17-Mar-2021		17-Mar-2021
1	2021-03-17	ftox-03-647918	Completed	17:38:21	Amshaveni N	Janani K	2	Gowtham M	2021-03-17 17:53:10	2021-03-17 18:06:59																												17-Mar-2021		17-Mar-2021
1	2021-03-17	fpsyg-12-627669	Completed	17:41:18	Gowrishankar S	Gopala Krishnan R	9	Santhosh Kumar L	2021-03-17 18:37:06	2021-03-17 18:42:09																												17-Mar-2021		17-Mar-2021
1	2021-03-17	frwa-03-627551	Completed	17:53:09	Buvanenthiran P	Nathiya S	2	Santhosh Kumar L	2021-03-17 18:07:29	2021-03-17 18:11:21																												17-Mar-2021		17-Mar-2021
1	2021-03-17	fpsyg-12-637289	Completed	18:12:47	Sathya R	Sridhar G	5	Gowtham M	2021-03-17 19:03:17	2021-03-17 19:12:58																												17-Mar-2021		17-Mar-2021
1	2021-03-17	frwa-03-603531	Completed	18:23:11	Priyadharshini S	Sumithra P	5	Gowtham M	2021-03-17 19:13:23	2021-03-17 19:18:07																												17-Mar-2021		17-Mar-2021
1	2021-03-17	fcvm-08-638011	Completed	18:36:02	Gowrishankar S	Sumithra P	6	Santhosh Kumar L	2021-03-17 18:42:21	2021-03-17 18:51:15																												17-Mar-2021		17-Mar-2021
1	2021-03-17	fpos-03-648646	Completed	18:40:24	Jeyaseelan R	Punniyamoorthy K	1	Gowtham M	2021-03-17 20:03:11	2021-03-17 20:07:32																												17-Mar-2021		17-Mar-2021
1	2021-03-17	fvets-08-656236	Completed	18:52:59	Priyadharshini S	Nathiya S	10	Gowtham M	2021-03-17 19:18:13	2021-03-17 19:50:14																												17-Mar-2021		17-Mar-2021
1	2021-03-17	fphys-12-651977	Completed	19:01:05	Gowrishankar S	Gopala Krishnan R	4	Santhosh Kumar L	2021-03-17 19:11:51	2021-03-17 19:14:35																												17-Mar-2021		17-Mar-2021
1	2021-03-17	fmed-08-605691	Completed	19:02:10	Priyadharshini S	Nathiya S	2	Gowtham M	2021-03-17 21:13:43	2021-03-17 21:16:34																												17-Mar-2021		17-Mar-2021
1	2021-03-17	fpsyg-12-638252	Completed	19:02:46	Siva Sankar Narayanan M	Divya A	5	Santhosh Kumar L	2021-03-17 19:09:28	2021-03-17 19:11:18																												17-Mar-2021		17-Mar-2021
2	2021-03-17	fpsyg-12-640349	Completed	19:29:25	Devilakshmi R	Sumithra P	2	Gowtham M	2021-03-17 19:52:34	2021-03-17 20:02:46	22:46:25	Devilakshmi R	Gopala Krishnan R	0	Gowtham M	2021-03-18 16:14:13	2021-03-18 16:16:31																					17-Mar-2021		17-Mar-2021
1	2021-03-17	fpsyt-12-625935	Completed	19:30:35	Sathya R	Janani K	5	Gowtham M	2021-03-17 20:24:56	2021-03-17 20:40:01																												17-Mar-2021		17-Mar-2021
1	2021-03-17	fsufs-05-650315	Completed	19:32:31	Buvanenthiran P	Janani M	2	Santhosh Kumar L	2021-03-17 19:33:21	2021-03-17 19:35:19																												17-Mar-2021		17-Mar-2021
1	2021-03-17	fpsyt-12-632496	Completed	19:35:26	Jeyaseelan R	Nathiya S	1	Gowtham M	2021-03-17 20:07:39	2021-03-17 20:16:33																												17-Mar-2021		17-Mar-2021
1	2021-03-17	fpsyg-12-622634	Completed	19:45:09	Gowrishankar S	Muthu Kumar M	6	Santhosh Kumar L	2021-03-17 20:07:08	2021-03-17 20:09:21																												17-Mar-2021		17-Mar-2021
1	2021-03-17	fnut-08-665436	Completed	19:47:00	Buvanenthiran P	Durga B	2	Santhosh Kumar L	2021-03-17 19:59:46	2021-03-17 20:00:49																												17-Mar-2021		17-Mar-2021
1	2021-03-17	fmed-08-637647	Completed	19:49:11	Mahalingam K	Divya A	9	Santhosh Kumar L	2021-03-17 20:09:39	2021-03-17 20:15:09																												17-Mar-2021		17-Mar-2021
1	2021-03-17	fonc-11-645475	Completed	19:49:59	Priyadharshini S	Sumithra P	10	Gowtham M	2021-03-17 21:16:44	2021-03-17 21:25:32																												17-Mar-2021		17-Mar-2021
1	2021-03-17	ffgc-04-653774	Completed	19:52:00	Siva Sankar Narayanan M	Kalaivani R	4	Santhosh Kumar L	2021-03-17 20:01:01	2021-03-17 20:06:14																												17-Mar-2021		17-Mar-2021
1	2021-03-17	fgene-12-650795	Completed	19:58:15	Sathya R	Gopala Krishnan R	3	Gowtham M	2021-03-17 20:58:19	2021-03-17 21:11:39																												17-Mar-2021		17-Mar-2021
1	2021-03-17	fcell-09-646890	Completed	20:06:17	Sathya R	Sumithra P	3	Santhosh Kumar L	2021-03-17 20:58:03	2021-03-17 20:59:28																												17-Mar-2021		17-Mar-2021
1	2021-03-17	fneur-12-647092	Completed	20:23:25	Mahalingam K	Divya A	7	Santhosh Kumar L	2021-03-17 20:24:06	2021-03-17 20:28:21																												17-Mar-2021		17-Mar-2021
1	2021-03-17	ftox-03-626543	Completed	20:25:29	Siva Sankar Narayanan M	Sumithra P	5	Santhosh Kumar L	2021-03-17 20:28:51	2021-03-17 20:38:27																												17-Mar-2021		17-Mar-2021
1	2021-03-17	fvets-07-617024	Completed	20:30:20	Thomas S		1	Gowtham M	2021-03-17 20:40:23	2021-03-17 20:40:53																												17-Mar-2021		17-Mar-2021
1	2021-03-17	fpubh-09-606376	Completed	20:37:37	Mahalingam K	Gopala Krishnan R	3	Santhosh Kumar L	2021-03-17 20:39:58	2021-03-17 20:41:47																												17-Mar-2021		17-Mar-2021
1	2021-03-17	fpsyt-12-653709	Completed	20:38:11	Siva Sankar Narayanan M	Muthu Kumar M	5	Santhosh Kumar L	2021-03-17 20:38:32	2021-03-17 20:39:42																												17-Mar-2021		17-Mar-2021
1	2021-03-17	fpsyg-12-643437	Completed	20:38:40	Buvanenthiran P	Sridhar G	3	Santhosh Kumar L	2021-03-17 20:41:57	2021-03-17 20:57:11																												17-Mar-2021		17-Mar-2021
1	2021-03-17	fpsyg-12-644587	Completed	20:54:38	Gowrishankar S	Sridhar G	6	Santhosh Kumar L	2021-03-17 20:59:40	2021-03-17 21:09:31																												17-Mar-2021		17-Mar-2021
1	2021-03-17	fpubh-09-633606	Completed	21:00:44	Jeyaseelan R	Kalaivani R	1	Gowtham M	2021-03-17 21:11:54	2021-03-17 21:13:34																												17-Mar-2021		17-Mar-2021
1	2021-03-17	fspor-03-633124	Completed	21:08:43	Buvanenthiran P	Kalaivani R	3	Santhosh Kumar L	2021-03-17 21:09:41	2021-03-17 21:21:06																												17-Mar-2021		17-Mar-2021
1	2021-03-17	fmars-08-637078	Completed	21:10:05	Priyadharshini S	Kalaivani R	10	Gowtham M	2021-03-17 21:25:37	2021-03-17 21:47:00																												17-Mar-2021		17-Mar-2021
1	2021-03-17	fresc-02-638602	Completed	21:14:30	Siva Sankar Narayanan M	Muthu Kumar M	5	Santhosh Kumar L	2021-03-17 21:21:17	2021-03-17 21:24:28																												17-Mar-2021		17-Mar-2021
1	2021-03-17	fsurg-08-649418	Completed	21:18:57	Gowrishankar S	Aswini M	4	Santhosh Kumar L	2021-03-17 21:24:46	2021-03-17 21:28:39																												17-Mar-2021		17-Mar-2021
1	2021-03-17	fpsyg-12-645032	Completed	21:36:28	Priyadharshini S	SenthilKumar P	10	Gowtham M	2021-03-17 21:47:53	2021-03-17 22:17:51																												17-Mar-2021		17-Mar-2021
1	2021-03-17	fonc-11-599995	Completed	21:58:30	Gowrishankar S	Muthu Kumar M	7	Santhosh Kumar L	2021-03-17 21:59:09	2021-03-17 22:02:08																												17-Mar-2021		17-Mar-2021
1	2021-03-17	fmolb-08-650757	Completed	21:59:25	Thomas S	Nathiya S	5	Maheswari D	2021-03-18 07:19:27	2021-03-18 07:19:35																												17-Mar-2021		18-Mar-2021
1	2021-03-18	fneur-12-607790	Completed	00:26:29	Thomas S	Durga B	5	Maheswari D	2021-03-18 07:19:51	2021-03-18 07:25:43																												18-Mar-2021		18-Mar-2021
1	2021-03-18	fneur-12-645925	Completed	01:08:02	Thomas S	Divya A	5	Maheswari D	2021-03-18 07:25:52	2021-03-18 07:28:50																												18-Mar-2021		18-Mar-2021
1	2021-03-18	fneur-12-652590	Completed	01:42:40	Thomas S	Kalaivani R	5	Maheswari D	2021-03-18 07:29:00	2021-03-18 08:06:08																												18-Mar-2021		18-Mar-2021
1	2021-03-18	fnhum-15-644079	Completed	02:02:17	Thomas S	Sumithra P	5	Maheswari D	2021-03-18 08:20:38	2021-03-18 08:30:13																												18-Mar-2021		18-Mar-2021
2	2021-03-18	fnut-08-622714	Completed	02:26:52	Thomas S	Aswini M	5	Maheswari D	2021-03-18 08:30:40	2021-03-18 08:36:22	08:43:53	Thomas S	Aswini M	2	Maheswari D	2021-03-18 09:03:50	2021-03-18 09:04:01																					18-Mar-2021		18-Mar-2021
1	2021-03-18	fgeed-03-618346	Completed	06:29:42	Ajith L	Janani K	4	Divya V	2021-03-18 08:11:03	2021-03-18 08:11:09																												18-Mar-2021		18-Mar-2021
1	2021-03-18	fimmu-12-605726	Completed	06:40:51	Thomas S	Aswini M	4	Maheswari D	2021-03-18 08:57:08	2021-03-18 09:00:41																												18-Mar-2021		18-Mar-2021
1	2021-03-18	fcvm-08-630471	Completed	07:08:00	Thomas S	Sridhar G	5	Maheswari D	2021-03-18 09:55:40	2021-03-18 10:05:57																												18-Mar-2021		18-Mar-2021
2	2021-03-18	fpsyt-12-579566	Completed	07:08:49	Jeyaseelan R	SenthilKumar P	1	Maheswari D	2021-03-18 10:06:13	2021-03-18 10:09:54	13:06:32	Jeyaseelan R	Janani K	1	Gowtham M	2021-03-18 13:29:26	2021-03-18 13:36:06																					18-Mar-2021		18-Mar-2021
1	2021-03-18	fonc-11-626076	Completed	07:12:50	Gowthami L	Janani M	3	Maheswari D	2021-03-18 08:06:53	2021-03-18 08:13:34																												18-Mar-2021		18-Mar-2021
1	2021-03-18	fsurg-08-652428	Completed	07:25:55	Gowthami L	Janani M	2	Maheswari D	2021-03-18 08:13:45	2021-03-18 08:20:01																												18-Mar-2021		18-Mar-2021
1	2021-03-18	fmicb-12-673867	Completed	07:26:24	Dinesh Kumar M	Kalaivani R	2	Divya V	2021-03-18 08:11:26	2021-03-18 08:24:13																												18-Mar-2021		18-Mar-2021
1	2021-03-18	fvets-08-616955	Completed	07:30:21	Uma Y	Gopala Krishnan R	10	Maheswari D	2021-03-18 09:04:26	2021-03-18 09:44:32																												18-Mar-2021		18-Mar-2021
1	2021-03-18	fneur-12-638904	Completed	07:32:13	Priyadharshini S	SenthilKumar P	1	Maheswari D	2021-03-18 07:42:29	2021-03-18 07:47:00																												18-Mar-2021		18-Mar-2021
1	2021-03-18	frvir-02-647896	Completed	07:36:53	Muthulakshmi R	Janani K	5	Divya V	2021-03-18 08:22:09	2021-03-18 08:51:52																												18-Mar-2021		18-Mar-2021
2	2021-03-18	fncir-15-608655	Completed	07:40:57	Gowthami L	Janani M	2	Maheswari D	2021-03-18 07:47:54	2021-03-18 08:06:34	10:20:23	Gowthami L	Muthu Kumar M	2	Maheswari D	2021-03-18 10:24:04	2021-03-18 10:27:41																					18-Mar-2021		18-Mar-2021
1	2021-03-18	fneur-12-631220	Completed	07:46:13	Jeyaseelan R	Sridhar G	1	Gowtham M	2021-03-18 11:30:27	2021-03-18 11:39:40																												18-Mar-2021		18-Mar-2021
1	2021-03-18	fenrg-09-610405	Completed	07:49:40	Thomas S	Durga B	5	Maheswari D	2021-03-18 10:10:36	2021-03-18 10:23:48																												18-Mar-2021		18-Mar-2021
1	2021-03-18	fsufs-05-652644	Completed	08:11:21	Muthulakshmi R	Janani K	2	Divya V	2021-03-18 08:50:02	2021-03-18 08:58:57																												18-Mar-2021		18-Mar-2021
1	2021-03-18	fpsyt-12-595124	Completed	08:18:30	Dinesh Kumar M	Aswini M	2	Divya V	2021-03-18 09:05:08	2021-03-18 09:45:42																												18-Mar-2021		18-Mar-2021
1	2021-03-18	fpsyg-12-628607	Completed	08:18:50	Sathya R	Gopala Krishnan R	2	Gowtham M	2021-03-18 11:01:48	2021-03-18 11:05:49																												18-Mar-2021		18-Mar-2021
2	2021-03-18	fneur-12-600050	Completed	08:24:24	Ajith L	Aswini M	27	Divya V	2021-03-18 15:00:07	2021-03-18 15:46:10	16:33:16	Ajith L	Aswini M	7	Gowtham M	2021-03-18 16:56:46	2021-03-18 16:56:58																					18-Mar-2021		18-Mar-2021
1	2021-03-18	fmed-08-659013	Completed	08:37:08	Priyadharshini S	SenthilKumar P	10	Gowtham M	2021-03-18 10:56:18	2021-03-18 11:01:37																												18-Mar-2021		18-Mar-2021
1	2021-03-18	fcvm-08-648265	Completed	08:45:52	Jeyaseelan R	Aswini M	3	Gowtham M	2021-03-18 11:39:46	2021-03-18 11:59:27																												18-Mar-2021		18-Mar-2021
1	2021-03-18	fneur-12-626787	Completed	08:52:35	Uma Y	Gopala Krishnan R	6	Maheswari D	2021-03-18 10:28:51	2021-03-18 10:45:43																												18-Mar-2021		18-Mar-2021
1	2021-03-18	fpsyg-12-642391	Completed	09:02:10	Sathya R	Muthu Kumar M	3	Gowtham M	2021-03-18 11:07:27	2021-03-18 11:18:18																												18-Mar-2021		18-Mar-2021
1	2021-03-18	fped-09-624652	Completed	09:10:42	Uma Y	Gopala Krishnan R	1	Maheswari D	2021-03-18 10:58:30	2021-03-18 11:02:28																												18-Mar-2021		18-Mar-2021
1	2021-03-18	fneur-12-627130	Completed	09:24:54	Ajith L	Sridhar G	3	Divya V	2021-03-18 09:56:32	2021-03-18 10:19:04																												18-Mar-2021		18-Mar-2021
1	2021-03-18	fimmu-12-644520	Completed	09:43:16	Gowthami L	Muthu Kumar M	6	Maheswari D	2021-03-18 09:44:41	2021-03-18 09:53:47																												18-Mar-2021		18-Mar-2021
1	2021-03-18	fneur-12-630366	Completed	09:47:51	Dinesh Kumar M	Gopala Krishnan R	2	Divya V	2021-03-18 10:19:32	2021-03-18 10:50:20																												18-Mar-2021		18-Mar-2021
1	2021-03-18	fvets-08-631164	Completed	09:48:40	Prakash A	Kalaivani R	8	Divya V	2021-03-18 10:47:52	2021-03-18 11:00:32																												18-Mar-2021		18-Mar-2021
1	2021-03-18	fonc-11-636565	Completed	09:54:13	Priyadharshini S	Durga B	10	Gowtham M	2021-03-18 12:50:21	2021-03-18 13:01:47																												18-Mar-2021		18-Mar-2021
1	2021-03-18	fpls-12-628294	Completed	10:05:40	Renganath K	Divya A	10	Maheswari D	2021-03-18 10:45:55	2021-03-18 10:49:44																												18-Mar-2021		18-Mar-2021
1	2021-03-18	fneur-12-648532	Completed	10:05:32	Jeyaseelan R	Gopala Krishnan R	4	Gowtham M	2021-03-18 11:59:32	2021-03-18 12:39:21																												18-Mar-2021		18-Mar-2021
1	2021-03-18	fcomp-03-628773	Completed	10:11:02	Prakash A	Durga B	5	Divya V	2021-03-18 10:52:20	2021-03-18 11:10:26																												18-Mar-2021		18-Mar-2021
1	2021-03-18	fcell-09-675417	Completed	10:16:03	Sathya R	Gopala Krishnan R	2	Gowtham M	2021-03-18 11:18:25	2021-03-18 11:21:31																												18-Mar-2021		18-Mar-2021
1	2021-03-18	fcomm-06-659484	Completed	10:17:20	Uma Y	Gopala Krishnan R	20	Maheswari D	2021-03-18 11:03:12	2021-03-18 11:49:26																												18-Mar-2021		18-Mar-2021
1	2021-03-18	fpsyg-12-668712	Completed	10:25:24	Sathya R	Vignesh V	3	Gowtham M	2021-03-18 11:21:37	2021-03-18 11:25:34																												18-Mar-2021		18-Mar-2021
1	2021-03-18	fnins-15-663053	Completed	10:31:38	Ajith L	Nathiya S	3	Divya V	2021-03-18 11:36:03	2021-03-18 11:57:11																												18-Mar-2021		18-Mar-2021
1	2021-03-18	ffgc-04-624724	Completed	10:33:48	Thomas S	Kalaivani R	5	Maheswari D	2021-03-18 10:51:05	2021-03-18 10:57:16																												18-Mar-2021		18-Mar-2021
1	2021-03-18	fmed-08-640974	Completed	10:40:12	Muthulakshmi R	Sridhar G	10	Divya V	2021-03-18 11:10:46	2021-03-18 11:48:53																												18-Mar-2021		18-Mar-2021
1	2021-03-18	fpsyg-12-625153	Completed	10:40:41	Dinesh Kumar M	Muthu Kumar M	2	Divya V	2021-03-18 12:15:39	2021-03-18 12:45:01																												18-Mar-2021		18-Mar-2021
1	2021-03-18	fimmu-12-618150	Completed	10:41:05	Prakash A	Janani K	4	Divya V	2021-03-18 11:00:44	2021-03-18 11:24:50																												18-Mar-2021		18-Mar-2021
2	2021-03-18	fpsyg-12-631979	Completed	10:46:31	Priyadharshini S	Sridhar G	10				10:55:22	Priyadharshini S	Sridhar G	10	Gowtham M	2021-03-18 13:01:53	2021-03-18 13:10:31																					18-Mar-2021		00-Jan-1900
1	2021-03-18	fvets-08-642095	Completed	10:49:19	Sathya R	SenthilKumar P	3	Gowtham M	2021-03-18 11:25:39	2021-03-18 11:30:03																												18-Mar-2021		18-Mar-2021
2	2021-03-18	fped-09-654171	Completed	11:07:20	Jeyaseelan R	SenthilKumar P	1	Gowtham M	2021-03-18 12:39:28	2021-03-18 12:44:03	13:02:44	Jeyaseelan R	Janani K	2	Gowtham M	2021-03-18 13:21:42	2021-03-18 13:29:20																					18-Mar-2021		18-Mar-2021
1	2021-03-18	fvets-08-652000	Completed	11:14:40	Sathya R	Janani M	3	Gowtham M	2021-03-18 12:46:12	2021-03-18 12:50:12																												18-Mar-2021		18-Mar-2021
1	2021-03-18	fvets-08-608700	Completed	11:30:51	Renganath K	Durga B	10	Maheswari D	2021-03-18 11:49:59	2021-03-18 11:53:43																												18-Mar-2021		18-Mar-2021
1	2021-03-18	fpsyg-12-636030	Completed	11:34:38	Priyadharshini S	Divya A	10	Gowtham M	2021-03-18 13:45:56	2021-03-18 13:59:34																												18-Mar-2021		18-Mar-2021
1	2021-03-18	fvets-08-637487	Completed	11:40:11	Gowthami L	Senthilkumar	7	Maheswari D	2021-03-18 12:00:21	2021-03-18 12:28:19																												18-Mar-2021		18-Mar-2021
1	2021-03-18	fnins-15-608567	Completed	11:48:24	Prakash A	SenthilKumar P	6	Divya V	2021-03-18 13:05:05	2021-03-18 15:04:01																												18-Mar-2021		18-Mar-2021
1	2021-03-18	fgene-12-644378	Completed	11:48:53	Thomas S	Muthu Kumar M	5	Maheswari D	2021-03-18 12:50:36	2021-03-18 12:57:17																												18-Mar-2021		18-Mar-2021
1	2021-03-18	fphy-09-636001	Completed	11:54:22	Muthulakshmi R	Sridhar G	7	Divya V	2021-03-18 13:52:32	2021-03-18 14:11:37																												18-Mar-2021		18-Mar-2021
1	2021-03-18	fpsyt-12-660575	Completed	11:57:53	Dinesh Kumar M	Janani K	2	Divya V	2021-03-18 12:16:50	2021-03-18 13:18:55																												18-Mar-2021		18-Mar-2021
1	2021-03-18	fanim-02-638782	Completed	12:00:06	Renganath K	Saravanavel Murugan P	10	Maheswari D	2021-03-18 12:31:34	2021-03-18 12:43:23																												18-Mar-2021		18-Mar-2021
1	2021-03-18	fonc-11-640150	Completed	12:15:50	Prakash A	Sumithra P	4	Divya V	2021-03-18 13:38:12	2021-03-18 14:58:49																												18-Mar-2021		18-Mar-2021
1	2021-03-18	fpsyg-12-650541	Completed	12:16:02	Priyadharshini S	Nathiya S	10	Gowtham M	2021-03-18 14:00:15	2021-03-18 14:19:21																												18-Mar-2021		18-Mar-2021
1	2021-03-18	fneur-12-585189	Completed	12:24:27	Devilakshmi R	Durga B	1	Santhosh Kumar L	2021-03-18 15:46:04	2021-03-18 15:49:05																												18-Mar-2021		18-Mar-2021
1	2021-03-18	fnut-08-645750	Completed	12:26:40	Sathya R	Gopala Krishnan R	3	Gowtham M	2021-03-18 13:10:39	2021-03-18 13:18:03																												18-Mar-2021		18-Mar-2021
1	2021-03-18	fbinf-01-652286	Completed	12:28:31	Renganath K	Divya A	10	Maheswari D	2021-03-18 12:43:33	2021-03-18 12:50:27																												18-Mar-2021		18-Mar-2021
1	2021-03-18	fsufs-05-649424	Completed	12:37:17	Prakash A	Janani M	6	Divya V	2021-03-18 13:10:03	2021-03-18 13:52:16																												18-Mar-2021		18-Mar-2021
1	2021-03-18	fpls-12-649660	Completed	12:41:21	Dinesh Kumar M	Janani M	2	Divya V	2021-03-18 14:05:28	2021-03-18 14:13:35																												18-Mar-2021		18-Mar-2021
1	2021-03-18	fcvm-08-645947	Completed	12:41:34	Gowthami L	SenthilKumar P	6	Maheswari D	2021-03-18 12:57:51	2021-03-18 13:39:07																												18-Mar-2021		18-Mar-2021
1	2021-03-18	frsen-02-645794	Completed	12:42:33	Muthulakshmi R	Sridhar G	8	Divya V	2021-03-18 14:08:54	2021-03-18 14:26:15																												18-Mar-2021		18-Mar-2021
1	2021-03-18	fmed-08-644154	Completed	12:48:49	Devilakshmi R	Saravanavel Murugan P	1	Santhosh Kumar L	2021-03-18 15:43:38	2021-03-18 15:45:57																												18-Mar-2021		18-Mar-2021
1	2021-03-18	fmed-08-642864	Completed	12:51:57	Uma Y	Gopala Krishnan R	5	Maheswari D	2021-03-18 13:39:25	2021-03-18 13:45:37																												18-Mar-2021		18-Mar-2021
1	2021-03-18	fmed-08-634197	Completed	12:54:05	Thomas S	Sumithra P	5	Maheswari D	2021-03-18 13:45:52	2021-03-18 13:52:29																												18-Mar-2021		18-Mar-2021
1	2021-03-18	fpubh-09-585235	Completed	12:55:14	Gowthami L	Saravanavel Murugan P	5	Maheswari D	2021-03-18 14:37:06	2021-03-18 14:43:00																												18-Mar-2021		18-Mar-2021
1	2021-03-18	fpls-12-645038	Completed	12:57:51	Jeyaseelan R	Janani K	4	Gowtham M	2021-03-18 13:36:13	2021-03-18 13:45:18																												18-Mar-2021		18-Mar-2021
1	2021-03-18	fchem-09-670410	Completed	13:00:10	Renganath K	Muthu Kumar M	10	Maheswari D	2021-03-18 13:53:12	2021-03-18 13:55:04																												18-Mar-2021		18-Mar-2021
1	2021-03-18	fpos-03-642037	Completed	13:00:33	Prakash A	Muthu Kumar M	4	Divya V	2021-03-18 13:08:40	2021-03-18 13:19:29																												18-Mar-2021		18-Mar-2021
1	2021-03-18	fneur-12-666701	Completed	13:07:39	Gowthami L	Saravanavel Murugan P	2	Gowtham M	2021-03-18 14:35:20	2021-03-18 14:41:54																												18-Mar-2021		18-Mar-2021
1	2021-03-18	fclim-03-639128	Completed	13:11:36	Renganath K	Aswini M	10	Maheswari D	2021-03-18 13:57:05	2021-03-18 14:00:54																												18-Mar-2021		18-Mar-2021
2	2021-03-18	fbioe-09-653509	Completed	13:18:28	Thomas S	SenthilKumar P	5				13:22:35	Thomas S	SenthilKumar P	5	Maheswari D	2021-03-18 14:04:43	2021-03-18 14:07:15																					18-Mar-2021		00-Jan-1900
1	2021-03-18	fneur-12-631801	Completed	13:36:50	Gowthami L	Saravanavel Murugan P	1	Gowtham M	2021-03-18 14:42:02	2021-03-18 14:46:20																												18-Mar-2021		18-Mar-2021
1	2021-03-18	fsoc-06-631961	Completed	13:38:18	Renganath K	Saravanavel Murugan P	10	Maheswari D	2021-03-18 14:01:00	2021-03-18 14:04:15																												18-Mar-2021		18-Mar-2021
1	2021-03-18	fonc-11-637804	Completed	13:41:05	Muthulakshmi R	SenthilKumar P	10	Divya V	2021-03-18 14:21:01	2021-03-18 14:32:12																												18-Mar-2021		18-Mar-2021
1	2021-03-18	fpsyt-12-549080	Completed	13:43:42	Priyadharshini S	Sumithra P	10	Gowtham M	2021-03-18 15:35:17	2021-03-18 15:42:50																												18-Mar-2021		18-Mar-2021
1	2021-03-18	fpsyg-12-619999	Completed	13:50:12	Amshaveni N	SenthilKumar P	10	Maheswari D	2021-03-18 14:08:41	2021-03-18 14:32:32																												18-Mar-2021		18-Mar-2021
1	2021-03-18	fpubh-09-637866	Completed	13:51:56	Ajith L	Saravanavel Murugan P	2	Divya V	2021-03-18 14:03:27	2021-03-18 14:03:33																												18-Mar-2021		18-Mar-2021
1	2021-03-18	fpsyg-12-611636	Completed	13:53:08	Amshaveni N	Janani M	6	Maheswari D	2021-03-18 14:43:22	2021-03-18 14:47:49																												18-Mar-2021		18-Mar-2021
1	2021-03-18	fonc-11-651123	Completed	14:15:55	Priyadharshini S	Sumithra P	10	Gowtham M	2021-03-18 15:42:55	2021-03-18 15:48:37																												18-Mar-2021		18-Mar-2021
1	2021-03-18	fnano-03-645995	Completed	14:18:13	Thomas S	Saravanavel Murugan P	5	Maheswari D	2021-03-18 14:35:02	2021-03-18 14:36:46																												18-Mar-2021		18-Mar-2021
1	2021-03-18	fmed-08-642296	Completed	14:25:36	Gowthami L	Divya A	5	Maheswari D	2021-03-18 14:48:37	2021-03-18 14:57:49																												18-Mar-2021		18-Mar-2021
1	2021-03-18	fpsyt-12-591934	Completed	14:51:52	Gowthami L	Sridhar G	5	Santhosh Kumar L	2021-03-18 14:57:56	2021-03-18 15:00:17																												18-Mar-2021		18-Mar-2021
1	2021-03-18	fpsyg-12-571991	Completed	15:12:52	Muthulakshmi R	Sridhar G	8	Gowtham M	2021-03-18 15:50:05	2021-03-18 15:56:55																												18-Mar-2021		18-Mar-2021
1	2021-03-18	fdgth-03-610006	Completed	15:19:31	Ajith L	Aswini M	2	Divya V	2021-03-18 15:47:57	2021-03-18 16:00:33																												18-Mar-2021		18-Mar-2021
1	2021-03-18	fdgth-03-653686	Completed	15:20:15	Ajith L	Sumithra P	2	Divya V	2021-03-18 15:48:08	2021-03-18 16:02:34																												18-Mar-2021		18-Mar-2021
1	2021-03-18	fpsyt-12-641241	Completed	15:28:00	Buvanenthiran P	Aswini M	2	Santhosh Kumar L	2021-03-18 15:33:55	2021-03-18 15:35:15																												18-Mar-2021		18-Mar-2021
2	2021-03-18	fonc-11-631703	Completed	15:41:22	Gowrishankar S	Janani K	6	Santhosh Kumar L	2021-03-18 15:49:21	2021-03-18 15:52:49	17:26:51	Gowrishankar S	Janani K	1	Santhosh Kumar L	2021-03-18 17:29:04	2021-03-18 17:30:46																					18-Mar-2021		18-Mar-2021
1	2021-03-18	fsufs-05-504063	Completed	15:55:05	Muthulakshmi R	Sridhar G	5	Gowtham M	2021-03-18 16:04:39	2021-03-18 16:13:08																												18-Mar-2021		18-Mar-2021
1	2021-03-18	fpls-12-644731	Completed	15:58:11	Priyadharshini S	Nathiya S	10	Gowtham M	2021-03-18 15:58:59	2021-03-18 16:04:29																												18-Mar-2021		18-Mar-2021
1	2021-03-18	fpsyg-12-640620	Completed	16:13:10	Mahalingam K	Janani K	11	Santhosh Kumar L	2021-03-18 16:13:37	2021-03-18 16:20:29																												18-Mar-2021		18-Mar-2021
1	2021-03-18	fpls-12-642955	Completed	17:20:17	Gowrishankar S	Kalaivani R	7	Santhosh Kumar L	2021-03-18 17:22:57	2021-03-18 17:25:42																												18-Mar-2021		18-Mar-2021
1	2021-03-18	fpsyg-12-644096	Completed	17:22:29	Mahalingam K	Janani M	9	Santhosh Kumar L	2021-03-18 17:25:50																													18-Mar-2021		18-Mar-2021
1	2021-03-18	frma-06-654438	Completed	17:28:48	Buvanenthiran P	Nathiya S	5	Gowtham M	2021-03-18 18:22:50	2021-03-18 18:43:43																												18-Mar-2021		18-Mar-2021
1	2021-03-18	fmed-08-611036	Completed	17:40:03	Siva Sankar Narayanan M	Durga B	5	Santhosh Kumar L	2021-03-18 17:40:52	2021-03-18 17:44:36																												18-Mar-2021		18-Mar-2021
1	2021-03-18	fmolb-08-644720	Completed	17:47:20	Dinesh Kumar M	Muthu Kumar M	2	Gowtham M	2021-03-18 17:48:23	2021-03-18 18:22:31																												18-Mar-2021		18-Mar-2021
1	2021-03-18	fpsyg-12-622102	Completed	18:05:45	Gowrishankar S	Divya A	3	Santhosh Kumar L	2021-03-18 18:18:09	2021-03-18 18:21:07																												18-Mar-2021		18-Mar-2021
1	2021-03-18	fpsyt-12-634976	Completed	18:25:56	Mahalingam K	Janani M	11	Santhosh Kumar L	2021-03-18 18:26:23	2021-03-18 18:27:42																												18-Mar-2021		18-Mar-2021
1	2021-03-18	fpls-12-651480	Completed	18:27:38	Devilakshmi R	Aswini M	2	Gowtham M	2021-03-18 18:43:51	2021-03-18 18:47:32																												18-Mar-2021		18-Mar-2021
1	2021-03-18	fpls-12-649394	Completed	18:42:05	Buvanenthiran P	Muthu Kumar M	2	Gowtham M	2021-03-18 18:48:13	2021-03-18 18:52:48																												18-Mar-2021		18-Mar-2021
1	2021-03-18	fpsyg-12-599240	Completed	19:09:17	Siva Sankar Narayanan M	Durga B	5	Santhosh Kumar L	2021-03-18 19:14:18	2021-03-18 19:23:15																												18-Mar-2021		18-Mar-2021
1	2021-03-18	fpsyg-12-637802	Completed	19:09:48	Gowrishankar S	Durga B	6	Santhosh Kumar L	2021-03-18 19:23:27	2021-03-18 19:27:51																												18-Mar-2021		18-Mar-2021
2	2021-03-18	fmed-08-579516	Completed	19:13:04	Mahalingam K	Janani M	9				19:14:12	Mahalingam K	Nathiya S	7	Santhosh Kumar L	2021-03-18 19:31:18	2021-03-18 19:33:26																					18-Mar-2021		00-Jan-1900
1	2021-03-18	fnmol-14-618815	Completed	19:38:45	Thomas S	Muthu Kumar M	5	Santhosh Kumar L	2021-03-18 20:04:03	2021-03-18 20:06:06																												18-Mar-2021		18-Mar-2021
1	2021-03-18	fresc-02-625055	Completed	19:45:05	Thomas S	Janani M	3	Santhosh Kumar L	2021-03-18 20:06:19	2021-03-18 20:08:11																												18-Mar-2021		18-Mar-2021
1	2021-03-18	fsufs-05-624203	Completed	19:51:12	Siva Sankar Narayanan M	Nathiya S	5	Santhosh Kumar L	2021-03-18 19:51:50	2021-03-18 19:55:41																												18-Mar-2021		18-Mar-2021
1	2021-03-18	frobt-08-650325	Completed	19:52:05	Devilakshmi R	Sridhar G	2	Santhosh Kumar L	2021-03-18 19:59:07	2021-03-18 20:00:20																												18-Mar-2021		18-Mar-2021
1	2021-03-18	fsoc-06-624909	Completed	20:18:37	Thomas S	Nathiya S	5	Santhosh Kumar L	2021-03-18 20:19:40	2021-03-18 20:22:53																												18-Mar-2021		18-Mar-2021
1	2021-03-18	fpsyg-12-605130	Completed	20:22:07	Buvanenthiran P	Sumithra P	2	Santhosh Kumar L	2021-03-18 20:23:08	2021-03-18 20:24:46																												18-Mar-2021		18-Mar-2021
1	2021-03-18	fmed-08-619547	Completed	20:26:08	Mahalingam K	Gopala Krishnan R	11	Santhosh Kumar L	2021-03-18 20:43:54	2021-03-18 20:52:31																												18-Mar-2021		18-Mar-2021
1	2021-03-18	fpsyg-12-604074	Completed	20:26:59	Siva Sankar Narayanan M	Saravanavel Murugan P	5	Santhosh Kumar L	2021-03-18 20:29:12	2021-03-18 20:36:14																												18-Mar-2021		18-Mar-2021
1	2021-03-18	fvets-08-611931	Completed	20:31:29	Gowrishankar S	Nathiya S	20	Santhosh Kumar L	2021-03-18 20:36:50	2021-03-18 20:42:35																												18-Mar-2021		18-Mar-2021
1	2021-03-18	fspas-08-631582	Completed	20:45:31	Thomas S	Janani M	5	Santhosh Kumar L	2021-03-18 20:57:54	2021-03-18 20:58:46																												18-Mar-2021		18-Mar-2021
1	2021-03-18	fpsyg-12-635145	Completed	20:50:12	Buvanenthiran P	Divya A	2	Santhosh Kumar L	2021-03-18 20:53:11	2021-03-18 20:55:52																												18-Mar-2021		18-Mar-2021
1	2021-03-18	fpsyg-12-631871	Completed	21:00:21	Siva Sankar Narayanan M	Gopala Krishnan R	5	Santhosh Kumar L	2021-03-18 21:01:55	2021-03-18 21:09:21																												18-Mar-2021		18-Mar-2021
1	2021-03-18	fpubh-09-641140	Completed	21:02:40	Buvanenthiran P	Gopala Krishnan R	2	Santhosh Kumar L	2021-03-18 21:09:28	2021-03-18 21:10:25																												18-Mar-2021		18-Mar-2021
1	2021-03-18	fgene-12-643733	Completed	21:07:29	Gowrishankar S	Gopala Krishnan R	5	Santhosh Kumar L	2021-03-18 21:11:12	2021-03-18 21:14:14																												18-Mar-2021		18-Mar-2021
1	2021-03-18	fcvm-08-648947	Completed	21:33:47	Devilakshmi R	Aswini M	2	Santhosh Kumar L	2021-03-18 21:36:03	2021-03-18 21:39:11																												18-Mar-2021		18-Mar-2021
2	2021-03-18	fimmu-12-599512	Completed	21:46:24	Gowrishankar S	Saravanavel Murugan P	5	Santhosh Kumar L	2021-03-18 21:47:29	2021-03-18 21:55:29	23:23:46	Gowrishankar S	Saravanavel Murugan P	2	Santhosh Kumar L	2021-03-18 23:38:31	2021-03-18 23:38:42																					18-Mar-2021		18-Mar-2021
1	2021-03-18	fmed-08-642313	Completed	21:52:27	Thomas S	Nathiya S	25	Maheswari D	2021-03-19 06:42:54	2021-03-19 10:10:50																												18-Mar-2021		19-Mar-2021
1	2021-03-18	fmicb-12-634891	Completed	22:22:14	Siva Sankar Narayanan M	Gopala Krishnan R	5	Santhosh Kumar L	2021-03-18 22:43:49	2021-03-18 22:45:56																												18-Mar-2021		18-Mar-2021
1	2021-03-18	fnhum-15-629437	Completed	22:35:42	Mahalingam K	Durga B	11	Santhosh Kumar L	2021-03-18 22:47:04	2021-03-18 22:52:43																												18-Mar-2021		18-Mar-2021
1	2021-03-18	fphys-12-669356	Completed	22:57:55	Siva Sankar Narayanan M	Kalaivani R	5	Santhosh Kumar L	2021-03-18 22:58:52	2021-03-18 22:59:53																												18-Mar-2021		18-Mar-2021
1	2021-03-18	fnut-08-647537	Completed	23:07:56	Mahalingam K	Kalaivani R	7	Santhosh Kumar L	2021-03-18 23:10:51	2021-03-18 23:14:04																												18-Mar-2021		18-Mar-2021
1	2021-03-18	frsc-03-573174	Completed	23:16:01	Gowrishankar S	Janani K	7	Santhosh Kumar L	2021-03-18 23:17:00	2021-03-18 23:25:13																												18-Mar-2021		18-Mar-2021
1	2021-03-18	fnbeh-15-664941	Completed	23:18:06	Siva Sankar Narayanan M	Sridhar G	4	Santhosh Kumar L	2021-03-18 23:33:23	2021-03-18 23:36:12																												18-Mar-2021		18-Mar-2021
1	2021-03-18	fpsyg-12-637304	Completed	23:29:03	Buvanenthiran P	Aswini M	2	Santhosh Kumar L	2021-03-18 23:30:17	2021-03-18 23:31:35																												18-Mar-2021		18-Mar-2021
1	2021-03-18	fphy-09-671647	Completed	23:33:21	Siva Sankar Narayanan M	Sridhar G	4	Santhosh Kumar L	2021-03-18 23:36:20	2021-03-18 23:38:12																												18-Mar-2021		18-Mar-2021
1	2021-03-18	fmech-07-658858	Completed	23:56:13	Gowrishankar S	Durga B	4	Santhosh Kumar L	2021-03-18 23:57:06	2021-03-19 00:01:42																												18-Mar-2021		18-Mar-2021
1	2021-03-19	fpubh-09-636089	Completed	00:00:05	Buvanenthiran P	Janani M	2	Santhosh Kumar L	2021-03-19 00:02:01	2021-03-19 00:04:26																												19-Mar-2021		19-Mar-2021
1	2021-03-19	fnut-08-669102	Completed	00:07:24	Mahalingam K	Sumithra P	11	Santhosh Kumar L	2021-03-19 00:08:05	2021-03-19 00:13:47																												19-Mar-2021		19-Mar-2021
1	2021-03-19	fpubh-09-650294	Completed	00:17:03	Buvanenthiran P	SenthilKumar P	2	Santhosh Kumar L	2021-03-19 00:17:23	2021-03-19 00:23:11																												19-Mar-2021		19-Mar-2021
1	2021-03-19	fmed-08-576970	Completed	00:28:09	Gowrishankar S	Janani K	4	Santhosh Kumar L	2021-03-19 00:29:08	2021-03-19 00:31:56																												19-Mar-2021		19-Mar-2021
1	2021-03-19	fonc-11-636591	Completed	00:38:15	Mahalingam K	Sridhar G	7	Santhosh Kumar L	2021-03-19 00:39:50	2021-03-19 00:58:26																												19-Mar-2021		19-Mar-2021
1	2021-03-19	fspor-03-635195	Completed	01:01:01	Buvanenthiran P	Gopala Krishnan R	4	Santhosh Kumar L	2021-03-19 01:05:12	2021-03-19 01:10:51																												19-Mar-2021		19-Mar-2021
1	2021-03-19	fmed-08-582896	Completed	01:14:21	Gowrishankar S	Muthu Kumar M	3	Santhosh Kumar L	2021-03-19 01:15:07	2021-03-19 01:16:27																												19-Mar-2021		19-Mar-2021
1	2021-03-19	fonc-11-646638	Completed	01:15:29	Mahalingam K	Saravanavel Murugan P	7	Santhosh Kumar L	2021-03-19 01:16:38	2021-03-19 01:38:09																												19-Mar-2021		19-Mar-2021
1	2021-03-19	frph-03-638116	Completed	01:31:19	Buvanenthiran P	Janani K	3	Santhosh Kumar L	2021-03-19 01:38:36	2021-03-19 01:44:17																												19-Mar-2021		19-Mar-2021
1	2021-03-19	fmed-08-643917	Completed	01:51:05	Gowrishankar S	SenthilKumar P	6	Santhosh Kumar L	2021-03-19 01:55:12	2021-03-19 02:01:55																												19-Mar-2021		19-Mar-2021
1	2021-03-19	fclim-03-650760	Completed	02:06:22	Buvanenthiran P	Kalaivani R	2	Santhosh Kumar L	2021-03-19 02:06:48	2021-03-19 02:11:05																												19-Mar-2021		19-Mar-2021
1	2021-03-19	fonc-11-648655	Completed	02:09:16	Mahalingam K	Divya A	7	Santhosh Kumar L	2021-03-19 02:14:06	2021-03-19 02:18:35																												19-Mar-2021		19-Mar-2021
1	2021-03-19	fcomm-06-549105	Completed	02:41:18	Buvanenthiran P	Saravanavel Murugan P	2	Santhosh Kumar L	2021-03-19 02:45:35	2021-03-19 02:47:22																												19-Mar-2021		19-Mar-2021
1	2021-03-19	fmats-08-663925	Completed	02:59:55	Buvanenthiran P	SenthilKumar P	2	Santhosh Kumar L	2021-03-19 03:01:50	2021-03-19 03:03:49																												19-Mar-2021		19-Mar-2021
1	2021-03-19	fphys-12-646666	Completed	07:12:29	Uma Y	SenthilKumar P	10	Maheswari D	2021-03-19 07:15:01	2021-03-19 08:34:34																												19-Mar-2021		19-Mar-2021
1	2021-03-19	fpsyg-12-554595	Completed	07:30:04	Sathya R	Punniyamoorthy K	3	Maheswari D	2021-03-19 07:38:01	2021-03-19 07:42:18																												19-Mar-2021		19-Mar-2021
1	2021-03-19	feduc-06-635278	Completed	07:40:11	Ajith L	Janani K	2	Divya V	2021-03-19 11:11:17	2021-03-19 11:40:14																												19-Mar-2021		19-Mar-2021
1	2021-03-19	fimmu-12-643441	Completed	07:43:35	Dinesh Kumar M	Sridhar G	2	Divya V	2021-03-19 10:11:21	2021-03-19 10:38:01																												19-Mar-2021		19-Mar-2021
1	2021-03-19	fpls-12-639508	Completed	07:47:17	Thomas S	Sumithra P	5	Maheswari D	2021-03-19 08:44:14	2021-03-19 08:47:38																												19-Mar-2021		19-Mar-2021
1	2021-03-19	fnhum-15-625888	Completed	07:47:50	Uma Y	SenthilKumar P	2	Maheswari D	2021-03-19 07:53:37	2021-03-19 08:13:21																												19-Mar-2021		19-Mar-2021
1	2021-03-19	fimmu-12-642087	Completed	08:01:25	Gowthami L	Saravanavel Murugan P	5	Maheswari D	2021-03-19 08:34:41	2021-03-19 08:37:47																												19-Mar-2021		19-Mar-2021
2	2021-03-19	frobt-08-617426	Completed	08:20:06	Sathya R	Sridhar G	2	Gowtham M	2021-03-19 15:11:53	2021-03-19 15:14:48	22:09:54	Sathya R	Sridhar G	1	Maheswari D	2021-03-20 08:02:31	2021-03-20 08:16:38																					19-Mar-2021		19-Mar-2021
1	2021-03-19	fphys-12-645303	Completed	08:21:56	Gowthami L	SenthilKumar P	1	Maheswari D	2021-03-19 08:38:10	2021-03-19 08:41:37																												19-Mar-2021		19-Mar-2021
1	2021-03-19	fspor-03-624449	Completed	08:29:20	Prakash A	Divya A	3	Divya V	2021-03-19 10:54:05	2021-03-19 11:03:16																												19-Mar-2021		19-Mar-2021
1	2021-03-19	fsurg-08-606100	Completed	08:30:13	Sathya R	Sumithra P	2	Gowtham M	2021-03-19 15:14:55	2021-03-19 15:18:33																												19-Mar-2021		19-Mar-2021
1	2021-03-19	fmars-08-640619	Completed	08:39:16	Gowthami L	Sridhar G	1	Maheswari D	2021-03-19 09:05:05	2021-03-19 09:09:40																												19-Mar-2021		19-Mar-2021
1	2021-03-19	fncel-15-662453	Completed	08:41:17	Uma Y	SenthilKumar P	8	Maheswari D	2021-03-19 10:12:48	2021-03-19 10:36:32																												19-Mar-2021		19-Mar-2021
1	2021-03-19	fimmu-12-634497	Completed	08:45:52	Muthulakshmi R	Durga B	2	Divya V	2021-03-19 11:58:17	2021-03-19 12:32:19																												19-Mar-2021		19-Mar-2021
1	2021-03-19	fonc-11-638873	Completed	08:56:37	Gowthami L	Sridhar G	4	Maheswari D	2021-03-19 10:36:42	2021-03-19 10:38:58																												19-Mar-2021		19-Mar-2021
1	2021-03-19	fvets-08-611153	Completed	09:02:43	Muthulakshmi R	Durga B	5	Divya V	2021-03-19 12:33:36	2021-03-19 13:02:11																												19-Mar-2021		19-Mar-2021
1	2021-03-19	fchem-09-659304	Completed	09:04:08	Dinesh Kumar M	Durga B	2	Divya V	2021-03-19 10:27:46	2021-03-19 10:47:39																												19-Mar-2021		19-Mar-2021
1	2021-03-19	fped-09-642508	Completed	09:04:50	Prakash A	Janani K	3	Divya V	2021-03-19 10:55:42	2021-03-19 11:03:38																												19-Mar-2021		19-Mar-2021
1	2021-03-19	fimmu-12-591236	Completed	09:14:29	Sathya R	Saravanavel Murugan P	3	Gowtham M	2021-03-19 15:18:41	2021-03-19 15:25:37																												19-Mar-2021		19-Mar-2021
2	2021-03-19	fnut-08-625596	Completed	09:16:33	Ajith L	SenthilKumar P	3	Divya V	2021-03-19 11:40:27	2021-03-19 11:51:01	12:32:33	Ajith L	SenthilKumar P	1	Divya V	2021-03-19 14:49:58	2021-03-19 15:23:24																					19-Mar-2021		19-Mar-2021
1	2021-03-19	fsufs-05-439881	Completed	09:25:48	Dinesh Kumar M	Durga B	2	Divya V	2021-03-19 10:38:24	2021-03-19 10:59:19																												19-Mar-2021		19-Mar-2021
1	2021-03-19	fmed-08-642313	Completed	09:28:30	Thomas S	Sumithra P	5	Maheswari D	2021-03-19 10:11:07	2021-03-19 10:12:15																												19-Mar-2021		19-Mar-2021
1	2021-03-19	fpls-12-672465	Completed	09:45:38	Ajith L	SenthilKumar P	1	Divya V	2021-03-19 11:51:13	2021-03-19 12:28:19																												19-Mar-2021		19-Mar-2021
1	2021-03-19	ftox-03-627470	Completed	09:46:07	Sathya R	Janani M	3	Gowtham M	2021-03-19 15:26:09	2021-03-19 15:31:44																												19-Mar-2021		19-Mar-2021
1	2021-03-19	frai-04-644712	Completed	09:50:40	Uma Y	SenthilKumar P	5	Maheswari D	2021-03-19 10:39:12	2021-03-19 10:57:00																												19-Mar-2021		19-Mar-2021
1	2021-03-19	fpls-12-653416	Completed	09:57:00	Thomas S	Janani K	5	Maheswari D	2021-03-19 10:57:50	2021-03-19 11:08:21																												19-Mar-2021		19-Mar-2021
1	2021-03-19	fonc-11-644737	Completed	09:59:28	Gowthami L	Kalaivani R	5	Maheswari D	2021-03-19 11:08:53	2021-03-19 11:23:22																												19-Mar-2021		19-Mar-2021
1	2021-03-19	fnhum-15-647908	Completed	10:01:27	Renganath K	Divya A	10	Maheswari D	2021-03-19 11:23:32	2021-03-19 11:25:50																												19-Mar-2021		19-Mar-2021
1	2021-03-19	fchem-09-641355	Completed	10:09:29	Sathya R	Gopala Krishnan R	3	Gowtham M	2021-03-19 15:31:55	2021-03-19 15:37:34																												19-Mar-2021		19-Mar-2021
1	2021-03-19	fneur-12-648457	Completed	10:22:16	Prakash A	Janani K	2	Divya V	2021-03-19 11:03:48	2021-03-19 11:22:56																												19-Mar-2021		19-Mar-2021
1	2021-03-19	fped-09-654531	Completed	10:24:22	Dinesh Kumar M	SenthilKumar P	2	Divya V	2021-03-19 10:49:37	2021-03-19 11:57:35																												19-Mar-2021		19-Mar-2021
1	2021-03-19	fpsyg-12-633530	Completed	10:28:48	Ajith L	SenthilKumar P	3	Divya V	2021-03-19 15:17:07	2021-03-19 15:39:36																												19-Mar-2021		19-Mar-2021
1	2021-03-19	fnut-08-669307	Completed	10:45:22	Dinesh Kumar M	Gopala Krishnan R	2	Divya V	2021-03-19 12:26:35	2021-03-19 12:35:27																												19-Mar-2021		19-Mar-2021
1	2021-03-19	fpsyg-12-568580	Completed	10:47:18	Renganath K	Aswini M	10	Maheswari D	2021-03-19 12:01:10	2021-03-19 12:07:52																												19-Mar-2021		19-Mar-2021
1	2021-03-19	fimmu-12-605930	Completed	10:50:42	Sathya R	Kalaivani R	3	Gowtham M	2021-03-19 15:38:07	2021-03-19 15:50:14																												19-Mar-2021		19-Mar-2021
1	2021-03-19	fvets-08-642809	Completed	10:54:41	Uma Y	SenthilKumar P	2	Maheswari D	2021-03-19 12:30:01	2021-03-19 12:35:14																												19-Mar-2021		19-Mar-2021
1	2021-03-19	fonc-11-611544	Completed	10:58:37	Prakash A	Saravanavel Murugan P	2	Divya V	2021-03-19 11:09:02	2021-03-19 11:33:18																												19-Mar-2021		19-Mar-2021
1	2021-03-19	fcomp-03-668711	Completed	10:59:01	Thomas S	Janani M	5	Maheswari D	2021-03-19 11:44:02	2021-03-19 12:00:41																												19-Mar-2021		19-Mar-2021
1	2021-03-19	fpsyt-12-608496	Completed	11:02:33	Muthulakshmi R	Durga B	15	Divya V	2021-03-19 13:40:00	2021-03-19 14:48:37																												19-Mar-2021		19-Mar-2021
1	2021-03-19	fpsyg-12-642643	Completed	11:03:59	Ajith L	Saravanavel Murugan P	1	Divya V	2021-03-19 13:14:28	2021-03-19 13:35:54																												19-Mar-2021		19-Mar-2021
1	2021-03-19	fpsyg-12-624588	Completed	11:07:58	Renganath K	Muthu Kumar M	10	Maheswari D	2021-03-19 12:08:00	2021-03-19 12:29:45																												19-Mar-2021		19-Mar-2021
1	2021-03-19	fped-09-649068	Completed	11:09:42	Gowthami L	Aswini M	5	Maheswari D	2021-03-19 12:36:11	2021-03-19 12:45:29																												19-Mar-2021		19-Mar-2021
1	2021-03-19	fimmu-12-619932	Completed	11:25:49	Sathya R	SenthilKumar P	5	Gowtham M	2021-03-19 15:50:20	2021-03-19 16:00:59																												19-Mar-2021		19-Mar-2021
1	2021-03-19	fcvm-08-617062	Completed	11:28:48	Thomas S	Durga B	5	Maheswari D	2021-03-19 12:45:51	2021-03-19 12:51:33																												19-Mar-2021		19-Mar-2021
1	2021-03-19	fpsyg-12-584183	Completed	11:28:59	Prakash A	Sumithra P	6	Divya V	2021-03-19 13:36:13	2021-03-19 13:44:44																												19-Mar-2021		19-Mar-2021
1	2021-03-19	fpsyg-12-643594	Completed	11:29:48	Ajith L	Divya A	1	Divya V	2021-03-19 12:59:13	2021-03-19 13:14:19																												19-Mar-2021		19-Mar-2021
1	2021-03-19	fnagi-13-624732	Completed	11:29:56	Manoj B	Divya A	4	Gowtham M	2021-03-19 16:03:04	2021-03-19 16:08:55																												19-Mar-2021		19-Mar-2021
1	2021-03-19	fnmol-14-644202	Completed	11:48:27	Manoj B	Gopala Krishnan R	3	Gowtham M	2021-03-19 16:09:04	2021-03-19 16:12:23																												19-Mar-2021		19-Mar-2021
1	2021-03-19	fncel-15-614556	Completed	11:48:44	Dinesh Kumar M	Sumithra P	2	Divya V	2021-03-19 12:45:47	2021-03-19 12:55:15																												19-Mar-2021		19-Mar-2021
1	2021-03-19	fpsyg-12-643702	Completed	11:52:25	Ajith L	Janani M	3	Divya V	2021-03-19 12:55:48	2021-03-19 13:14:05																												19-Mar-2021		19-Mar-2021
1	2021-03-19	fpsyg-12-636578	Completed	11:55:51	Renganath K	Divya A	10	Maheswari D	2021-03-19 12:51:57	2021-03-19 12:57:16																												19-Mar-2021		19-Mar-2021
1	2021-03-19	fams-07-651467	Completed	12:13:56	Muthulakshmi R	Durga B	12	Divya V	2021-03-19 13:50:36	2021-03-19 14:18:39																												19-Mar-2021		19-Mar-2021
1	2021-03-19	fpsyg-12-621312	Completed	12:16:11	Prakash A	Janani K	6	Divya V	2021-03-19 14:25:51	2021-03-19 14:49:09																												19-Mar-2021		19-Mar-2021
1	2021-03-19	fonc-11-641931	Completed	12:22:27	Uma Y	Saravanavel Murugan P	1	Maheswari D	2021-03-19 13:05:12	2021-03-19 13:11:02																												19-Mar-2021		19-Mar-2021
1	2021-03-19	fmed-08-644871	Completed	12:21:54	Manoj B	Durga B	4	Gowtham M	2021-03-19 16:12:50	2021-03-19 16:19:34																												19-Mar-2021		19-Mar-2021
1	2021-03-19	fneur-12-627761	Completed	12:23:48	Dinesh Kumar M	Divya A	2	Divya V	2021-03-19 13:41:09	2021-03-19 14:03:12																												19-Mar-2021		19-Mar-2021
1	2021-03-19	fpsyg-12-642347	Completed	12:30:21	Gowthami L	Divya A	5	Maheswari D	2021-03-19 13:11:18	2021-03-19 13:32:51																												19-Mar-2021		19-Mar-2021
1	2021-03-19	fpsyg-12-641451	Completed	12:35:43	Renganath K	SenthilKumar P	10	Maheswari D	2021-03-19 12:57:38	2021-03-19 13:04:38																												19-Mar-2021		19-Mar-2021
1	2021-03-19	fphy-09-659782	Completed	12:40:44	Manoj B	Janani K	3	Santhosh Kumar L	2021-03-19 15:46:28	2021-03-19 15:49:11																												19-Mar-2021		19-Mar-2021
1	2021-03-19	fpsyg-12-634621	Completed	12:43:06	Prakash A	Sridhar G	5	Maheswari D	2021-03-19 14:09:55	2021-03-19 14:15:01																												19-Mar-2021		19-Mar-2021
1	2021-03-19	fpubh-09-570098	Completed	13:04:40	Renganath K	Janani M	10	Maheswari D	2021-03-19 13:39:56	2021-03-19 13:43:22																												19-Mar-2021		19-Mar-2021
1	2021-03-19	fpsyt-12-592443	Completed	13:04:58	Uma Y	Saravanavel Murugan P	4	Maheswari D	2021-03-19 13:33:32	2021-03-19 13:38:32																												19-Mar-2021		19-Mar-2021
1	2021-03-19	fped-09-590969	Completed	13:06:58	Muthulakshmi R	Durga B	15	Gowtham M	2021-03-19 14:33:27	2021-03-19 15:06:16																												19-Mar-2021		19-Mar-2021
1	2021-03-19	fpsyg-12-632948	Completed	13:10:02	Ajith L	SenthilKumar P	1	Maheswari D	2021-03-19 14:31:03	2021-03-19 14:32:53																												19-Mar-2021		19-Mar-2021
1	2021-03-19	fpsyt-12-582392	Completed	13:15:05	Gowthami L	Kalaivani R	5	Maheswari D	2021-03-19 13:44:15	2021-03-19 13:51:14																												19-Mar-2021		19-Mar-2021
1	2021-03-19	fneur-12-625308	Completed	13:26:18	Thomas S	Kalaivani R	5	Maheswari D	2021-03-19 14:04:06	2021-03-19 14:07:57																												19-Mar-2021		19-Mar-2021
1	2021-03-19	fviro-01-671745	Completed	13:30:00	Prakash A	Aswini M	2	Divya V	2021-03-19 14:07:53	2021-03-19 14:29:40																												19-Mar-2021		19-Mar-2021
1	2021-03-19	fcomp-03-624694	Completed	13:42:50	Uma Y	Punniyamoorthy K	6	Maheswari D	2021-03-19 13:51:40	2021-03-19 14:03:54																												19-Mar-2021		19-Mar-2021
1	2021-03-19	fpsyg-12-605886	Completed	13:46:03	Muthulakshmi R	Durga B	7	Gowtham M	2021-03-19 14:26:21	2021-03-19 14:33:19																												19-Mar-2021		19-Mar-2021
1	2021-03-19	fphy-09-654868	Completed	14:24:02	Manoj B	Sumithra P	3	Santhosh Kumar L	2021-03-19 15:42:58	2021-03-19 15:44:51																												19-Mar-2021		19-Mar-2021
1	2021-03-19	fneur-12-666657	Completed	14:31:15	Thomas S	Gopala Krishnan R	5	Maheswari D	2021-03-19 14:33:50	2021-03-19 15:38:13																												19-Mar-2021		19-Mar-2021
1	2021-03-19	fnut-08-652469	Completed	14:51:47	Mahalingam K	Gopala Krishnan R	11	Santhosh Kumar L	2021-03-19 15:50:51	2021-03-19 15:54:59																												19-Mar-2021		19-Mar-2021
1	2021-03-19	fpsyg-12-625191	Completed	15:14:54	Thomas S	Janani M	5	Santhosh Kumar L	2021-03-19 15:38:27	2021-03-19 15:38:33																												19-Mar-2021		19-Mar-2021
1	2021-03-19	frobt-08-576783	Completed	15:27:35	Jeyaseelan R	Sridhar G	2	Gowtham M	2021-03-19 17:23:20	2021-03-19 17:31:52																												19-Mar-2021		19-Mar-2021
1	2021-03-19	fpsyt-12-519727	Completed	15:38:49	Renganath K	Janani M	10	Santhosh Kumar L	2021-03-19 15:55:45	2021-03-19 15:58:03																												19-Mar-2021		19-Mar-2021
1	2021-03-19	fphys-12-651851	Completed	15:49:38	Siva Sankar Narayanan M	Saravanavel Murugan P	5	Santhosh Kumar L	2021-03-19 15:58:17	2021-03-19 16:05:04																												19-Mar-2021		19-Mar-2021
1	2021-03-19	fenvs-09-577286	Completed	15:57:00	Buvanenthiran P	Nathiya S	6	Santhosh Kumar L	2021-03-19 16:05:27	2021-03-19 16:16:31																												19-Mar-2021		19-Mar-2021
1	2021-03-19	fonc-11-633210	Completed	16:07:20	Renganath K	Muthu Kumar M	10	Santhosh Kumar L	2021-03-19 16:16:39	2021-03-19 16:22:47																												19-Mar-2021		19-Mar-2021
1	2021-03-19	fpls-12-644881	Completed	16:20:08	Priyadharshini S	Sridhar G	10	Gowtham M	2021-03-19 16:52:10	2021-03-19 17:22:28																												19-Mar-2021		19-Mar-2021
1	2021-03-19	fphys-12-639066	Completed	16:20:56	Mahalingam K	Janani M	11	Santhosh Kumar L	2021-03-19 16:24:27	2021-03-19 17:17:16																												19-Mar-2021		19-Mar-2021
1	2021-03-19	fpubh-09-602546	Completed	16:42:11	Jeyaseelan R	Aswini M	4	Gowtham M	2021-03-19 17:31:58	2021-03-19 17:47:19																												19-Mar-2021		19-Mar-2021
1	2021-03-19	fpsyg-12-644657	Completed	16:49:22	Siva Sankar Narayanan M	Divya A	5	Santhosh Kumar L	2021-03-19 17:17:23	2021-03-19 17:18:57																												19-Mar-2021		19-Mar-2021
1	2021-03-19	fpsyg-12-629046	Completed	17:00:02	Gowrishankar S	Kalaivani R	5	Santhosh Kumar L	2021-03-19 17:19:05	2021-03-19 17:25:31																												19-Mar-2021		19-Mar-2021
1	2021-03-19	fped-09-631765	Completed	17:00:25	Renganath K	Durga B	10	Santhosh Kumar L	2021-03-19 17:26:24	2021-03-19 17:28:15																												19-Mar-2021		19-Mar-2021
1	2021-03-19	fpsyt-12-579987	Completed	17:16:20	Priyadharshini S	Aswini M	10	Gowtham M	2021-03-19 18:06:47	2021-03-19 18:29:05																												19-Mar-2021		19-Mar-2021
1	2021-03-19	fpsyg-12-595615	Completed	17:27:21	Mahalingam K	Kalaivani R	7	Santhosh Kumar L	2021-03-19 17:57:04	2021-03-19 18:00:01																												19-Mar-2021		19-Mar-2021
1	2021-03-19	fpubh-09-637031	Completed	17:45:44	Siva Sankar Narayanan M	Janani M	5	Santhosh Kumar L	2021-03-19 18:00:18	2021-03-19 18:04:56																												19-Mar-2021		19-Mar-2021
1	2021-03-19	fsurg-08-596971	Completed	17:50:55	Priyadharshini S	Aswini M	10	Gowtham M	2021-03-19 18:29:11	2021-03-19 18:40:13																												19-Mar-2021		19-Mar-2021
1	2021-03-19	fpsyg-12-647076	Completed	17:53:18	Renganath K	Kalaivani R	10	Gowtham M	2021-03-19 18:40:47	2021-03-19 18:45:26																												19-Mar-2021		19-Mar-2021
1	2021-03-19	fcomm-06-610807	Completed	17:57:23	Jeyaseelan R	Nathiya S	1	Gowtham M	2021-03-19 19:06:05	2021-03-19 19:20:47																												19-Mar-2021		19-Mar-2021
1	2021-03-19	fonc-11-629132	Completed	17:58:37	Buvanenthiran P	Nathiya S	2	Santhosh Kumar L	2021-03-19 18:05:57	2021-03-19 18:29:15																												19-Mar-2021		19-Mar-2021
1	2021-03-19	fpsyt-12-598857	Completed	18:00:55	Devilakshmi R	Saravanavel Murugan P	3	Gowtham M	2021-03-19 19:38:21	2021-03-19 19:47:43																												19-Mar-2021		19-Mar-2021
1	2021-03-19	fpsyg-12-667667	Completed	18:01:08	Mahalingam K	Aswini M	9	Santhosh Kumar L	2021-03-19 18:29:33	2021-03-19 18:32:21																												19-Mar-2021		19-Mar-2021
1	2021-03-19	fpsyg-12-666218	Completed	18:08:31	Renganath K	Divya A	10	Santhosh Kumar L	2021-03-19 18:37:53	2021-03-19 18:41:14																												19-Mar-2021		19-Mar-2021
2	2021-03-19	fpsyt-12-651722	Completed	18:11:10	Gowrishankar S	Muthu Kumar M	6	Santhosh Kumar L	2021-03-19 18:32:30	2021-03-19 18:35:06	20:15:05	Gowrishankar S	Muthu Kumar M	1	Santhosh Kumar L	2021-03-19 20:39:49	2021-03-19 20:42:13																					19-Mar-2021		19-Mar-2021
1	2021-03-19	fcvm-08-607104	Completed	18:12:34	Jeyaseelan R	Durga B	1	Gowtham M	2021-03-19 19:20:52	2021-03-19 19:28:07																												19-Mar-2021		19-Mar-2021
1	2021-03-19	fmats-08-626397	Completed	18:28:03	Siva Sankar Narayanan M	Kalaivani R	5	Santhosh Kumar L	2021-03-19 18:35:16	2021-03-19 18:36:32																												19-Mar-2021		19-Mar-2021
1	2021-03-19	fpsyg-12-631614	Completed	18:31:00	Buvanenthiran P	Durga B	2	Santhosh Kumar L	2021-03-19 18:41:46	2021-03-19 18:45:42																												19-Mar-2021		19-Mar-2021
1	2021-03-19	fpsyt-12-642914	Completed	18:37:48	Renganath K	Divya A	10	Gowtham M	2021-03-19 18:45:31	2021-03-19 18:54:52																												19-Mar-2021		19-Mar-2021
1	2021-03-19	fspas-08-626398	Completed	18:37:59	Jeyaseelan R	Janani K	1	Gowtham M	2021-03-19 20:36:47	2021-03-19 20:41:49																												19-Mar-2021		19-Mar-2021
1	2021-03-19	feart-09-626720	Completed	18:57:19	Priyadharshini S	Janani K	10	Gowtham M	2021-03-19 19:47:54	2021-03-19 20:09:08																												19-Mar-2021		19-Mar-2021
1	2021-03-19	fmed-08-578959	Completed	19:01:53	Siva Sankar Narayanan M	Janani M	5	Santhosh Kumar L	2021-03-19 19:29:57	2021-03-19 19:33:59																												19-Mar-2021		19-Mar-2021
1	2021-03-19	fsufs-05-645736	Completed	19:02:44	Gowrishankar S	Janani K	7	Santhosh Kumar L	2021-03-19 19:34:10	2021-03-19 19:37:00																												19-Mar-2021		19-Mar-2021
1	2021-03-19	fpsyt-12-655471	Completed	19:03:33	Renganath K	Muthu Kumar M	10	Gowtham M	2021-03-19 19:28:15	2021-03-19 19:36:53																												19-Mar-2021		19-Mar-2021
1	2021-03-19	fpsyt-12-565358	Completed	19:23:32	Mahalingam K	Sumithra P	11	Santhosh Kumar L	2021-03-19 19:37:25	2021-03-19 19:41:08																												19-Mar-2021		19-Mar-2021
1	2021-03-19	fimmu-12-625181	Completed	19:28:32	Jeyaseelan R	Sumithra P	1	Gowtham M	2021-03-19 20:41:54	2021-03-19 20:47:42																												19-Mar-2021		19-Mar-2021
1	2021-03-19	fevo-09-619682	Completed	19:36:22	Gowrishankar S	Sumithra P	3	Santhosh Kumar L	2021-03-19 19:41:21	2021-03-19 19:43:11																												19-Mar-2021		19-Mar-2021
1	2021-03-19	fspor-03-604605	Completed	19:37:49	Siva Sankar Narayanan M	Sridhar G	5	Santhosh Kumar L	2021-03-19 19:43:21	2021-03-19 19:48:35																												19-Mar-2021		19-Mar-2021
1	2021-03-19	frai-04-630955	Completed	19:42:16	Buvanenthiran P	Janani K	2	Santhosh Kumar L	2021-03-19 19:48:50	2021-03-19 20:29:23																												19-Mar-2021		19-Mar-2021
1	2021-03-19	frvir-02-647997	Completed	19:55:42	Priyadharshini S	Gopala Krishnan R	10	Gowtham M	2021-03-19 20:55:47	2021-03-19 21:09:32																												19-Mar-2021		19-Mar-2021
1	2021-03-19	fvets-08-632525	Completed	20:05:57	Buvanenthiran P	Saravanavel Murugan P	2	Santhosh Kumar L	2021-03-19 20:29:31	2021-03-19 20:31:05																												19-Mar-2021		19-Mar-2021
1	2021-03-19	fgene-12-674765	Completed	20:06:19	Gowrishankar S	Kalaivani R	3	Santhosh Kumar L	2021-03-19 20:31:26	2021-03-19 20:32:33																												19-Mar-2021		19-Mar-2021
1	2021-03-19	fpsyt-12-650989	Completed	20:10:06	Jeyaseelan R	Kalaivani R	2	Gowtham M	2021-03-19 20:47:51	2021-03-19 20:55:23																												19-Mar-2021		19-Mar-2021
1	2021-03-19	fpsyt-12-632784	Completed	20:10:09	Devilakshmi R	Muthu Kumar M	2	Gowtham M	2021-03-19 20:27:25	2021-03-19 20:36:37																												19-Mar-2021		19-Mar-2021
1	2021-03-19	feart-09-653753	Completed	20:20:55	Siva Sankar Narayanan M	Durga B	5	Santhosh Kumar L	2021-03-19 20:32:50	2021-03-19 20:37:43																												19-Mar-2021		19-Mar-2021
1	2021-03-19	fcvm-08-629734	Completed	20:28:04	Buvanenthiran P	Sridhar G	2	Santhosh Kumar L	2021-03-19 20:37:54	2021-03-19 20:39:21																												19-Mar-2021		19-Mar-2021
1	2021-03-19	fpubh-09-654952	Completed	20:31:21	Thomas S	Janani M	5	Santhosh Kumar L	2021-03-19 21:39:08	2021-03-19 21:41:07																												19-Mar-2021		19-Mar-2021
1	2021-03-19	fcomm-06-641865	Completed	20:34:20	Mahalingam K	Durga B	9	Santhosh Kumar L	2021-03-19 20:42:29	2021-03-19 21:02:19																												19-Mar-2021		19-Mar-2021
1	2021-03-19	fimmu-12-645528	Completed	20:52:42	Buvanenthiran P	Kalaivani R	2	Santhosh Kumar L	2021-03-19 21:02:25	2021-03-19 21:24:10																												19-Mar-2021		19-Mar-2021
1	2021-03-19	fsoc-06-607645	Completed	20:55:01	Priyadharshini S	Muthu Kumar M	10	Gowtham M	2021-03-19 21:09:39	2021-03-19 21:23:24																												19-Mar-2021		19-Mar-2021
1	2021-03-19	fpubh-09-642630	Completed	21:03:54	Gowrishankar S	Saravanavel Murugan P	5	Santhosh Kumar L	2021-03-19 21:24:20	2021-03-19 21:29:33																												19-Mar-2021		19-Mar-2021
1	2021-03-19	fsoc-06-652777	Completed	21:05:44	Thomas S	Divya A	5	Maheswari D	2021-03-20 07:08:05	2021-03-20 07:23:10																												19-Mar-2021		20-Mar-2021
2	2021-03-19	fpsyg-12-585719	Completed	21:26:06	Gowrishankar S	Nathiya S	5	Santhosh Kumar L	2021-03-19 21:29:41	2021-03-19 21:31:36	21:50:18	Gowrishankar S	Nathiya S	1	Santhosh Kumar L	2021-03-19 21:51:42	2021-03-19 21:56:42																					19-Mar-2021		19-Mar-2021
1	2021-03-19	fmed-08-639440	Completed	21:28:59	Buvanenthiran P	Divya A	2	Santhosh Kumar L	2021-03-19 21:32:40	2021-03-19 21:51:29																												19-Mar-2021		19-Mar-2021
1	2021-03-19	fmed-08-618645	Completed	21:30:12	Devilakshmi R	Janani M	3	Gowtham M	2021-03-19 21:41:30	2021-03-19 21:55:39																												19-Mar-2021		19-Mar-2021
1	2021-03-19	fneur-12-625087	Completed	21:53:51	Buvanenthiran P	Janani M	3	Santhosh Kumar L	2021-03-19 21:56:48	2021-03-19 22:03:23																												19-Mar-2021		19-Mar-2021
1	2021-03-19	fgwh-02-644609	Completed	21:57:01	Priyadharshini S	Saravanavel Murugan P	10	Gowtham M	2021-03-19 21:57:29	2021-03-19 22:09:27																												19-Mar-2021		19-Mar-2021
2	2021-03-20	fneur-12-602979	Completed	07:07:36	Gowthami L	Kalaivani R	4	Maheswari D	2021-03-20 07:24:30	2021-03-20 07:45:23	08:18:15	Gowthami L	Punniyamoorthy K	1	Maheswari D	2021-03-20 08:22:27	2021-03-20 08:22:32																					20-Mar-2021		20-Mar-2021
1	2021-03-20	ffgc-04-624724	Completed	07:21:08	Thomas S	Janani M	5	Maheswari D	2021-03-20 08:31:52	2021-03-20 08:45:34																												20-Mar-2021		20-Mar-2021
1	2021-03-20	fspor-03-603020	Completed	07:32:29	Gowthami L	Durga B	5	Maheswari D	2021-03-20 08:16:50	2021-03-20 08:31:39																												20-Mar-2021		20-Mar-2021
1	2021-03-20	fneur-12-652590	Completed	08:01:36	Thomas S	Divya A	5	Maheswari D	2021-03-20 10:02:08	2021-03-20 10:23:29																												20-Mar-2021		20-Mar-2021
1	2021-03-20	fpsyg-12-641465	Completed	08:07:09	Dinesh Kumar M	Sumithra P	2	Divya V	2021-03-20 10:28:29	2021-03-20 10:44:44																												20-Mar-2021		20-Mar-2021
1	2021-03-20	frma-06-630124	Completed	08:11:13	Gowthami L	Punniyamoorthy K	4	Maheswari D	2021-03-20 10:49:51	2021-03-20 11:01:08																												20-Mar-2021		20-Mar-2021
1	2021-03-20	fsufs-05-624242	Completed	08:12:13	Prakash A	Aswini M	4	Divya V	2021-03-20 09:50:26	2021-03-20 09:59:59																												20-Mar-2021		20-Mar-2021
1	2021-03-20	fneur-12-655943	Completed	08:39:41	Thomas S	Kalaivani R	5	Maheswari D	2021-03-20 10:23:39	2021-03-20 10:27:54																												20-Mar-2021		20-Mar-2021
1	2021-03-20	fsurg-08-647656	Completed	08:41:54	Dinesh Kumar M	SenthilKumar P	2	Divya V	2021-03-20 10:38:57	2021-03-20 10:54:20																												20-Mar-2021		20-Mar-2021
1	2021-03-20	fnut-08-648821	Completed	08:49:21	Thomas S	Janani K	5	Maheswari D	2021-03-20 10:29:14	2021-03-20 10:31:44																												20-Mar-2021		20-Mar-2021
1	2021-03-20	fped-09-630036	Completed	09:07:25	Thomas S	Divya A	5	Maheswari D	2021-03-20 10:31:59	2021-03-20 10:37:30																												20-Mar-2021		20-Mar-2021
1	2021-03-20	fmats-08-611078	Completed	09:19:11	Gowthami L	Gopala Krishnan R	5	Maheswari D	2021-03-20 11:01:18	2021-03-20 11:17:00																												20-Mar-2021		20-Mar-2021
1	2021-03-20	fcvm-08-668387	Completed	09:29:17	Ajith L	Aswini M	5	Maheswari D	2021-03-20 11:32:57	2021-03-20 11:55:02																												20-Mar-2021		20-Mar-2021
1	2021-03-20	fmed-08-591201	Completed	09:30:32	Prakash A	Sridhar G	4	Divya V	2021-03-20 09:52:44	2021-03-20 10:13:50																												20-Mar-2021		20-Mar-2021
1	2021-03-20	fvets-08-634338	Completed	09:37:08	Dinesh Kumar M	Aswini M	3	Divya V	2021-03-20 10:46:32	2021-03-20 11:03:58																												20-Mar-2021		20-Mar-2021
1	2021-03-20	fbuil-07-670559	Completed	09:46:12	Prakash A	Sumithra P	4	Divya V	2021-03-20 10:00:16	2021-03-20 10:18:26																												20-Mar-2021		20-Mar-2021
1	2021-03-20	fmed-08-637872	Completed	09:47:10	Muthulakshmi R	Janani K	8	Divya V	2021-03-20 11:20:05	2021-03-20 11:50:18																												20-Mar-2021		20-Mar-2021
1	2021-03-20	fphy-09-651316	Completed	09:58:13	Ajith L	Aswini M	2	Maheswari D	2021-03-20 12:00:31	2021-03-20 12:20:50																												20-Mar-2021		20-Mar-2021
1	2021-03-20	fneur-12-645706	Completed	10:06:38	Dinesh Kumar M	Sridhar G	2	Divya V	2021-03-20 10:54:34	2021-03-20 11:17:19																												20-Mar-2021		20-Mar-2021
1	2021-03-20	fneur-12-621637	Completed	10:08:39	Prakash A	Janani M	5	Divya V	2021-03-20 12:32:16	2021-03-20 12:38:51																												20-Mar-2021		20-Mar-2021
1	2021-03-20	fpls-12-643971	Completed	10:38:17	Gowthami L	Nathiya S	6	Maheswari D	2021-03-20 11:17:12	2021-03-20 11:32:49																												20-Mar-2021		20-Mar-2021
1	2021-03-20	fped-09-654015	Completed	10:45:58	Thomas S	Janani M	5	Maheswari D	2021-03-20 11:55:14	2021-03-20 12:41:28																												20-Mar-2021		20-Mar-2021
1	2021-03-20	fpsyt-12-575005	Completed	10:46:49	Ajith L	Nathiya S	3	Divya V	2021-03-20 12:07:51	2021-03-20 12:31:03																												20-Mar-2021		20-Mar-2021
1	2021-03-20	fneur-12-630638	Completed	10:50:06	Prakash A	Sridhar G	4	Divya V	2021-03-20 12:35:09	2021-03-20 12:44:21																												20-Mar-2021		20-Mar-2021
1	2021-03-20	fmed-08-645651	Completed	10:58:21	Muthulakshmi R	Janani K	3	Divya V	2021-03-20 11:50:49	2021-03-20 12:07:28																												20-Mar-2021		20-Mar-2021
1	2021-03-20	fspor-03-653173	Completed	11:13:11	Dinesh Kumar M	Divya A	2	Divya V	2021-03-20 12:39:15	2021-03-20 12:59:17																												20-Mar-2021		20-Mar-2021
1	2021-03-20	fpsyt-12-613735	Completed	11:41:59	Ajith L	Janani K	1	Divya V	2021-03-20 13:10:50	2021-03-20 13:26:05																												20-Mar-2021		20-Mar-2021
1	2021-03-20	fmed-08-661710	Completed	11:48:30	Muthulakshmi R	Janani K	4	Divya V	2021-03-20 13:04:22	2021-03-20 13:13:39																												20-Mar-2021		20-Mar-2021
1	2021-03-20	fpubh-09-648612	Completed	12:10:41	Sathya R	Punniyamoorthy K	2	Maheswari D	2021-03-20 12:26:08	2021-03-20 12:38:12																												20-Mar-2021		20-Mar-2021
1	2021-03-20	feart-09-638441	Completed	12:13:18	Dinesh Kumar M	Kalaivani R	2	Divya V	2021-03-20 12:59:32	2021-03-20 13:03:40																												20-Mar-2021		20-Mar-2021
1	2021-03-20	fpsyg-12-640349	Completed	12:19:19	Sathya R	Sumithra P	3	Maheswari D	2021-03-20 13:06:54	2021-03-20 13:12:25																												20-Mar-2021		20-Mar-2021
1	2021-03-20	fpsyt-12-623765	Completed	12:24:32	Ajith L	Durga B	3	Divya V	2021-03-20 13:13:52	2021-03-20 13:48:44																												20-Mar-2021		20-Mar-2021
1	2021-03-20	fnut-08-652094	Completed	12:28:47	Prakash A	Sridhar G	4	Divya V	2021-03-20 13:26:20	2021-03-20 14:01:37																												20-Mar-2021		20-Mar-2021
1	2021-03-20	fpubh-09-603603	Completed	12:47:20	Ajith L	Saravanavel Murugan P	1	Divya V	2021-03-20 15:18:02	2021-03-20 15:44:24																												20-Mar-2021		20-Mar-2021
2	2021-03-20	fphy-09-644815	Completed	12:56:17	Gowthami L	Saravanavel Murugan P	5	Maheswari D	2021-03-20 13:12:39	2021-03-20 13:33:19	14:51:04	Gowthami L	Nathiya S	1	Santhosh Kumar L	2021-03-20 15:05:52	2021-03-20 15:05:59																					20-Mar-2021		20-Mar-2021
1	2021-03-20	fnins-15-599549	Completed	13:05:50	Dinesh Kumar M	Divya A	2	Divya V	2021-03-20 13:43:52	2021-03-20 13:52:40																												20-Mar-2021		20-Mar-2021
1	2021-03-20	fphys-12-671292	Completed	13:06:10	Sathya R	Saravanavel Murugan P	2	Maheswari D	2021-03-20 14:10:48	2021-03-20 14:13:56																												20-Mar-2021		20-Mar-2021
1	2021-03-20	fphy-09-643333	Completed	13:11:06	Thomas S	Janani M	5	Maheswari D	2021-03-20 13:36:11	2021-03-20 13:55:18																												20-Mar-2021		20-Mar-2021
1	2021-03-20	fcvm-08-613400	Completed	13:24:30	Prakash A	Sridhar G	5	Divya V	2021-03-20 13:59:05	2021-03-20 14:18:17																												20-Mar-2021		20-Mar-2021
1	2021-03-20	fnana-15-632549	Completed	13:29:27	Muthulakshmi R	Gopala Krishnan R	12	Divya V	2021-03-20 14:09:48	2021-03-20 17:39:48																												20-Mar-2021		20-Mar-2021
2	2021-03-20	fpls-12-672329	Completed	13:29:36	Sathya R	Durga B	3	Maheswari D	2021-03-20 14:14:03	2021-03-20 14:21:05	15:40:30	Sathya R	Durga B	1	Sanjay Kumar T	2021-03-20 15:42:54	2021-03-20 15:45:11																					20-Mar-2021		20-Mar-2021
1	2021-03-20	fsufs-05-534616	Completed	14:12:00	Gowthami L	Sridhar G	8	Maheswari D	2021-03-20 14:21:12	2021-03-20 14:36:49																												20-Mar-2021		20-Mar-2021
1	2021-03-20	fpsyg-12-636030	Completed	14:34:26	Priyadharshini S	Gopala Krishnan R	2	Sanjay Kumar T	2021-03-20 16:27:42	2021-03-20 16:31:03																												20-Mar-2021		20-Mar-2021
1	2021-03-20	fnsys-15-624353	Completed	14:35:07	Siva Sankar Narayanan M	Janani K	4	Santhosh Kumar L	2021-03-20 15:03:08	2021-03-20 15:33:57																												20-Mar-2021		20-Mar-2021
1	2021-03-20	fmed-08-627611	Completed	14:51:49	Buvanenthiran P	Muthu Kumar M	2	Santhosh Kumar L	2021-03-20 15:04:02	2021-03-20 15:05:35																												20-Mar-2021		20-Mar-2021
1	2021-03-20	fneur-12-650601	Completed	14:53:28	Prakash A	Aswini M	4	Divya V	2021-03-20 16:00:00	2021-03-20 16:12:04																												20-Mar-2021		20-Mar-2021
1	2021-03-20	fpsyg-12-645926	Completed	14:57:13	Ajith L	Sumithra P	3	Divya V	2021-03-20 16:07:15	2021-03-20 16:29:43																												20-Mar-2021		20-Mar-2021
1	2021-03-20	fvets-08-630111	Completed	15:01:52	Sathya R	Gopala Krishnan R	2	Sanjay Kumar T	2021-03-20 15:42:39	2021-03-20 15:42:43																												20-Mar-2021		20-Mar-2021
1	2021-03-20	fmed-08-644871	Completed	15:10:34	Sathya R	Durga B	5	Sanjay Kumar T	2021-03-20 15:51:22	2021-03-20 15:55:53																												20-Mar-2021		20-Mar-2021
1	2021-03-20	fpsyt-12-652717	Completed	15:19:39	Siva Sankar Narayanan M	Divya A	4	Santhosh Kumar L	2021-03-20 15:34:11	2021-03-20 15:38:19																												20-Mar-2021		20-Mar-2021
1	2021-03-20	fnagi-13-624732	Completed	15:26:21	Sathya R	Divya A	3	Sanjay Kumar T	2021-03-20 16:21:22	2021-03-20 16:25:49																												20-Mar-2021		20-Mar-2021
1	2021-03-20	fphys-12-646903	Completed	15:31:57	Muthulakshmi R	Saravanavel Murugan P	5	Divya V	2021-03-20 16:27:02	2021-03-20 17:01:39																												20-Mar-2021		20-Mar-2021
1	2021-03-20	frobt-08-645290	Completed	15:43:31	Gowrishankar S	Durga B	4	Santhosh Kumar L	2021-03-20 15:52:49	2021-03-20 15:55:59																												20-Mar-2021		20-Mar-2021
1	2021-03-20	fnut-08-601526	Completed	15:44:19	Prakash A	Janani K	5	Divya V	2021-03-20 15:45:18	2021-03-20 16:05:14																												20-Mar-2021		20-Mar-2021
1	2021-03-20	fpsyt-12-658205	Completed	15:46:22	Mahalingam K	Divya A	7	Santhosh Kumar L	2021-03-20 15:56:10	2021-03-20 16:00:30																												20-Mar-2021		20-Mar-2021
1	2021-03-20	fgene-12-655187	Completed	15:54:52	Priyadharshini S	Muthu Kumar M	10	Sanjay Kumar T	2021-03-20 16:34:47	2021-03-20 16:35:48																												20-Mar-2021		20-Mar-2021
1	2021-03-20	fsufs-05-644829	Completed	15:57:28	Siva Sankar Narayanan M	Sumithra P	5	Santhosh Kumar L	2021-03-20 16:01:02	2021-03-20 16:03:33																												20-Mar-2021		20-Mar-2021
1	2021-03-20	fpls-12-651928	Completed	15:58:24	Ajith L	Sumithra P	8	Divya V	2021-03-20 17:42:19	2021-03-20 17:51:50																												20-Mar-2021		20-Mar-2021
1	2021-03-20	fneur-12-638402	Completed	15:58:37	Buvanenthiran P	Divya A	2	Santhosh Kumar L	2021-03-20 16:03:59	2021-03-20 16:05:24																												20-Mar-2021		20-Mar-2021
1	2021-03-20	fpsyg-12-631678	Completed	16:16:01	Ajith L	Senthilkumar	1	Divya V	2021-03-20 16:23:51	2021-03-20 16:32:04																												20-Mar-2021		20-Mar-2021
1	2021-03-20	fnut-08-614105	Completed	16:19:53	Prakash A	Divya A	4	Sanjay Kumar T	2021-03-20 17:31:49	2021-03-20 17:37:26																												20-Mar-2021		20-Mar-2021
2	2021-03-20	fneur-12-642899	Completed	16:20:18	Priyadharshini S	Janani M	10	Sanjay Kumar T	2021-03-20 16:37:24	2021-03-20 16:39:39	21:15:43	Priyadharshini S	Janani M	2	Sanjay Kumar T	2021-03-20 21:17:45	2021-03-20 21:18:26																					20-Mar-2021		20-Mar-2021
1	2021-03-20	fpsyt-12-652254	Completed	16:21:33	Muthulakshmi R	Saravanavel Murugan P	10	Divya V	2021-03-20 16:53:15	2021-03-20 17:26:59																												20-Mar-2021		20-Mar-2021
1	2021-03-20	fpubh-08-570458	Completed	16:27:54	Mahalingam K	Janani M	11	Santhosh Kumar L	2021-03-20 16:38:39	2021-03-20 16:40:45																												20-Mar-2021		20-Mar-2021
1	2021-03-20	fvets-08-653129	Completed	16:37:40	Ajith L	Divya A	1	Santhosh Kumar L	2021-03-20 17:05:56	2021-03-20 17:16:35																												20-Mar-2021		20-Mar-2021
1	2021-03-20	fmed-08-655956	Completed	16:38:30	Priyadharshini S	Durga B	10	Sanjay Kumar T	2021-03-20 16:43:22	2021-03-20 16:45:44																												20-Mar-2021		20-Mar-2021
2	2021-03-20	fmed-08-615540	Completed	16:47:34	Amshaveni N	Gopala Krishnan R	5	Divya V	2021-03-20 17:48:25	2021-03-20 18:03:12	19:06:26	Amshaveni N	Gopala Krishnan R	2	Sanjay Kumar T	2021-03-20 19:18:14	2021-03-20 19:23:43																					20-Mar-2021		20-Mar-2021
1	2021-03-20	fphys-12-638936	Completed	16:52:08	Buvanenthiran P	Janani K	2	Santhosh Kumar L	2021-03-20 16:55:25	2021-03-20 16:56:34																												20-Mar-2021		20-Mar-2021
1	2021-03-20	fmed-08-613951	Completed	16:52:30	Siva Sankar Narayanan M	Saravanavel Murugan P	5	Santhosh Kumar L	2021-03-20 16:56:43	2021-03-20 16:59:01																												20-Mar-2021		20-Mar-2021
1	2021-03-20	fneur-12-642664	Completed	17:00:28	Ajith L	Gopala Krishnan R	1	Santhosh Kumar L	2021-03-20 17:04:01	2021-03-20 17:05:47																												20-Mar-2021		20-Mar-2021
1	2021-03-20	finsc-01-650520	Completed	17:07:04	Priyadharshini S	Aswini M	10	Sanjay Kumar T	2021-03-20 17:21:56	2021-03-20 17:27:30																												20-Mar-2021		20-Mar-2021
2	2021-03-20	fcvm-08-605993	Completed	17:07:42	Gowrishankar S	Janani K	7	Santhosh Kumar L	2021-03-20 17:17:15	2021-03-20 17:21:25	22:17:29	Gowrishankar S	Janani K	2	Santhosh Kumar L	2021-03-20 22:18:46	2021-03-20 22:21:00																					20-Mar-2021		20-Mar-2021
2	2021-03-20	fvets-08-637837	Completed	17:09:07	Amshaveni N	Kalaivani R	5	Divya V	2021-03-20 17:59:33	2021-03-20 18:16:48	19:02:26	Amshaveni N	Kalaivani R	1	Sanjay Kumar T	2021-03-20 19:25:10	2021-03-20 19:29:23																					20-Mar-2021		20-Mar-2021
1	2021-03-20	fonc-11-641376	Completed	17:10:47	Siva Sankar Narayanan M	Punniyamoorthy K	5	Santhosh Kumar L	2021-03-20 17:26:38	2021-03-20 17:30:24																												20-Mar-2021		20-Mar-2021
1	2021-03-20	fpubh-09-653450	Completed	17:16:12	Amshaveni N	Divya A	2	Divya V	2021-03-20 18:12:05	2021-03-20 18:25:04																												20-Mar-2021		20-Mar-2021
1	2021-03-20	fspor-03-624475	Completed	17:24:27	Gowthami L	Kalaivani R	7	Santhosh Kumar L	2021-03-20 17:32:22	2021-03-20 17:39:04																												20-Mar-2021		20-Mar-2021
1	2021-03-20	fvets-08-626424	Completed	17:30:46	Buvanenthiran P	Janani M	2	Santhosh Kumar L	2021-03-20 17:39:18	2021-03-20 17:41:14																												20-Mar-2021		20-Mar-2021
1	2021-03-20	fenrg-09-638437	Completed	17:30:59	Amshaveni N	Nathiya S	4	Divya V	2021-03-20 18:17:36	2021-03-20 18:27:05																												20-Mar-2021		20-Mar-2021
1	2021-03-20	fpsyt-12-631032	Completed	17:32:59	Gowthami L	Aswini M	1	Santhosh Kumar L	2021-03-20 17:41:37	2021-03-20 17:42:55																												20-Mar-2021		20-Mar-2021
1	2021-03-20	fphy-09-654868	Completed	17:34:22	Sathya R	Sumithra P	5	Sanjay Kumar T	2021-03-20 18:47:36	2021-03-20 18:57:09																												20-Mar-2021		20-Mar-2021
1	2021-03-20	fpubh-09-645035	Completed	17:36:54	Mahalingam K	Durga B	11	Santhosh Kumar L	2021-03-20 17:43:10	2021-03-20 17:48:29																												20-Mar-2021		20-Mar-2021
1	2021-03-20	fvets-08-659786	Completed	17:46:02	Gowthami L	Saravanavel Murugan P	1	Santhosh Kumar L	2021-03-20 17:48:41	2021-03-20 18:07:43																												20-Mar-2021		20-Mar-2021
1	2021-03-20	fped-09-640184	Completed	18:03:07	Amshaveni N	Nathiya S	2	Santhosh Kumar L	2021-03-20 18:16:24	2021-03-20 18:17:45																												20-Mar-2021		20-Mar-2021
1	2021-03-20	fneur-12-654543	Completed	18:06:39	Siva Sankar Narayanan M	Aswini M	5	Santhosh Kumar L	2021-03-20 18:07:51	2021-03-20 18:14:01																												20-Mar-2021		20-Mar-2021
1	2021-03-20	fmed-08-578959	Completed	18:11:10	Siva Sankar Narayanan M	Aswini M	5	Santhosh Kumar L	2021-03-20 18:14:07	2021-03-20 18:16:17																												20-Mar-2021		20-Mar-2021
1	2021-03-20	fphy-09-659782	Completed	18:19:48	Sathya R	Janani K	5	Sanjay Kumar T	2021-03-20 18:57:30	2021-03-20 18:59:10																												20-Mar-2021		20-Mar-2021
1	2021-03-20	fpsyg-12-580992	Completed	18:20:32	Priyadharshini S	Divya A	10	Sanjay Kumar T	2021-03-20 19:31:22	2021-03-20 19:39:02																												20-Mar-2021		20-Mar-2021
1	2021-03-20	fpubh-09-637031	Completed	18:22:04	Siva Sankar Narayanan M	Aswini M	5	Santhosh Kumar L	2021-03-20 19:23:40	2021-03-20 19:26:01																												20-Mar-2021		20-Mar-2021
1	2021-03-20	fpsyt-12-565136	Completed	18:24:29	Gowthami L	\Aswini M	5	Santhosh Kumar L	2021-03-20 18:27:34	2021-03-20 18:36:32																												20-Mar-2021		20-Mar-2021
1	2021-03-20	fpsyt-12-638328	Completed	18:37:21	Buvanenthiran P	Sridhar G	2	Santhosh Kumar L	2021-03-20 19:26:12	2021-03-20 19:28:25																												20-Mar-2021		20-Mar-2021
1	2021-03-20	frobt-08-668305	Completed	18:50:03	Sathya R	Janani K	3	Sanjay Kumar T	2021-03-20 19:05:00	2021-03-20 19:05:42																												20-Mar-2021		20-Mar-2021
1	2021-03-20	fpubh-09-628748	Completed	18:54:30	Amshaveni N	SenthilKumar P	10	Santhosh Kumar L	2021-03-20 19:18:28	2021-03-20 19:23:16																												20-Mar-2021		20-Mar-2021
1	2021-03-20	fneur-12-648958	Completed	18:54:39	Buvanenthiran P	Sridhar G	2	Santhosh Kumar L	2021-03-20 19:28:46	2021-03-20 19:31:17																												20-Mar-2021		20-Mar-2021
1	2021-03-20	fvets-08-639096	Completed	18:57:39	Mahalingam K	Kalaivani R	7	Santhosh Kumar L	2021-03-20 19:33:32	2021-03-20 19:35:47																												20-Mar-2021		20-Mar-2021
1	2021-03-20	fmed-08-660367	Completed	19:17:55	Mahalingam K	SenthilKumar P	9	Santhosh Kumar L	2021-03-20 19:35:59	2021-03-20 19:37:49																												20-Mar-2021		20-Mar-2021
1	2021-03-20	fmed-08-616927	Completed	19:21:55	Siva Sankar Narayanan M	SenthilKumar P	5	Santhosh Kumar L	2021-03-20 19:38:13	2021-03-20 19:39:55																												20-Mar-2021		20-Mar-2021
1	2021-03-20	fpsyg-12-604291	Completed	19:22:25	Priyadharshini S	Senthilkumar	10	Sanjay Kumar T	2021-03-20 19:36:18	2021-03-20 19:38:25																												20-Mar-2021		20-Mar-2021
2	2021-03-20	fpsyg-12-601200	Completed	19:47:14	Gowthami L	Saravanavel Murugan P	8	Santhosh Kumar L	2021-03-20 19:49:26	2021-03-20 19:55:17	20:13:10	Gowthami L	\Aswini M	2	Santhosh Kumar L	2021-03-20 20:17:31	2021-03-20 20:17:37																					20-Mar-2021		20-Mar-2021
1	2021-03-20	fpsyg-12-638985	Completed	19:51:35	Gowrishankar S	Divya A	7	Santhosh Kumar L	2021-03-20 19:55:26	2021-03-20 19:59:32																												20-Mar-2021		20-Mar-2021
1	2021-03-20	fneur-12-634065	Completed	20:02:36	Siva Sankar Narayanan M	Senthilkumar	5	Santhosh Kumar L	2021-03-20 20:04:12	2021-03-20 20:08:53																												20-Mar-2021		20-Mar-2021
1	2021-03-20	fmed-08-583086	Completed	20:11:12	Buvanenthiran P	Muthu Kumar M	2	Santhosh Kumar L	2021-03-20 20:17:43	2021-03-20 20:20:49																												20-Mar-2021		20-Mar-2021
1	2021-03-20	fpsyt-12-652296	Completed	20:26:39	Mahalingam K	Gopala Krishnan R	7	Santhosh Kumar L	2021-03-20 20:28:04	2021-03-20 20:29:20																												20-Mar-2021		20-Mar-2021
1	2021-03-20	frsc-03-635970	Completed	20:31:34	Priyadharshini S	Janani M	10	Sanjay Kumar T	2021-03-20 21:07:26	2021-03-20 21:14:27																												20-Mar-2021		20-Mar-2021
1	2021-03-20	fpsyt-12-635214	Completed	20:34:16	Buvanenthiran P	Gopala Krishnan R	2	Santhosh Kumar L	2021-03-20 20:35:28	2021-03-20 20:40:04																												20-Mar-2021		20-Mar-2021
1	2021-03-20	fpsyt-12-634299	Completed	20:38:48	Gowrishankar S	Nathiya S	4	Santhosh Kumar L	2021-03-20 20:46:51	2021-03-20 20:49:36																												20-Mar-2021		20-Mar-2021
1	2021-03-20	fmicb-12-614185	Completed	20:49:00	Priyadharshini S	Muthu Kumar M	10	Sanjay Kumar T	2021-03-20 21:19:45	2021-03-20 21:28:06																												20-Mar-2021		20-Mar-2021
1	2021-03-20	fmolb-08-649007	Completed	20:50:58	Sathya R	Sumithra P	2	Sanjay Kumar T	2021-03-20 21:03:26	2021-03-20 21:05:43																												20-Mar-2021		20-Mar-2021
1	2021-03-20	fpsyt-12-602981	Completed	21:52:04	Gowrishankar S	Sumithra P	4	Santhosh Kumar L	2021-03-20 21:53:43	2021-03-20 21:57:30																												20-Mar-2021		20-Mar-2021
1	2021-03-20	fmed-08-636637	Completed	22:43:53	Mahalingam K	Janani K	7	Santhosh Kumar L	2021-03-20 23:09:46	2021-03-20 23:16:19																												20-Mar-2021		20-Mar-2021
1	2021-03-20	fmedt-03-604475	Completed	22:54:14	Buvanenthiran P	Saravanavel Murugan P	2	Santhosh Kumar L	2021-03-20 23:16:31	2021-03-20 23:17:58																												20-Mar-2021		20-Mar-2021
1	2021-03-20	fpubh-09-610268	Completed	23:19:30	Gowrishankar S	Muthu Kumar M	4	Santhosh Kumar L	2021-03-20 23:20:23	2021-03-20 23:26:53																												20-Mar-2021		20-Mar-2021
1	2021-03-20	fmicb-12-633740	Completed	23:19:39	Mahalingam K	Nathiya S	11	Santhosh Kumar L	2021-03-20 23:37:06	2021-03-20 23:38:58																												20-Mar-2021		20-Mar-2021
1	2021-03-20	fpsyg-12-645310	Completed	23:43:55	Buvanenthiran P	Nathiya S	3	Santhosh Kumar L	2021-03-20 23:50:45	2021-03-21 00:00:18																												20-Mar-2021		20-Mar-2021
1	2021-03-20	fneur-12-632286	Completed	23:44:19	Mahalingam K	Sridhar G	3	Santhosh Kumar L	2021-03-20 23:53:14	2021-03-20 23:54:20																												20-Mar-2021		20-Mar-2021
1	2021-03-21	fsoc-06-608328	Completed	00:15:56	Gowrishankar S	Nathiya S	4	Santhosh Kumar L	2021-03-21 00:21:37	2021-03-21 00:23:55																												21-Mar-2021		21-Mar-2021
1	2021-03-21	fnut-08-660420	Completed	00:34:11	Mahalingam K	Janani M	7	Santhosh Kumar L	2021-03-21 00:34:50	2021-03-21 00:39:58																												21-Mar-2021		21-Mar-2021
1	2021-03-21	fpsyg-12-648280	Completed	00:42:20	Buvanenthiran P	Saravanavel Murugan P	3	Santhosh Kumar L	2021-03-21 00:43:05	2021-03-21 00:48:34																												21-Mar-2021		21-Mar-2021
1	2021-03-21	fspor-03-653962	Completed	00:56:28	Gowrishankar S	Divya A	5	Santhosh Kumar L	2021-03-21 00:57:14	2021-03-21 01:01:00																												21-Mar-2021		21-Mar-2021
1	2021-03-21	fvets-08-645251	Completed	01:43:34	Gowrishankar S	Aswini M	11	Santhosh Kumar L	2021-03-21 01:44:36	2021-03-21 01:52:42																												21-Mar-2021		21-Mar-2021
1	2021-03-21	fpsyt-12-514579	Completed	01:53:57	Buvanenthiran P	Janani K	2	Santhosh Kumar L	2021-03-21 01:57:59	2021-03-21 01:59:36																												21-Mar-2021		21-Mar-2021
1	2021-03-21	fmolb-08-646730	Completed	02:10:12	Gowrishankar S	Divya A	3	Santhosh Kumar L	2021-03-21 02:10:37	2021-03-21 02:12:11																												21-Mar-2021		21-Mar-2021
1	2021-03-21	fvets-08-629627	Completed	06:49:12	Prakash A	Gopala Krishnan R	4	Divya V	2021-03-21 08:01:53	2021-03-21 08:29:13																												21-Mar-2021		21-Mar-2021
1	2021-03-21	fpls-12-643585	Completed	07:35:01	Ajith L	Senthilkumar	1	Divya V	2021-03-21 08:36:37	2021-03-21 09:02:32																												21-Mar-2021		21-Mar-2021
1	2021-03-21	fpsyg-12-616656	Completed	07:36:35	Siva Sankar Narayanan M	Senthilkumar	5	Divya V	2021-03-21 09:12:46	2021-03-21 09:26:21																												21-Mar-2021		21-Mar-2021
1	2021-03-21	fpls-12-645689	Completed	07:37:41	Priyadharshini S	Kalaivani R	10	Maheswari D	2021-03-21 10:17:50	2021-03-21 10:30:13																												21-Mar-2021		21-Mar-2021
1	2021-03-21	fpsyt-12-640218	Completed	07:37:49	Prakash A	Sumithra P	4	Divya V	2021-03-21 08:08:09	2021-03-21 08:31:55																												21-Mar-2021		21-Mar-2021
1	2021-03-21	fsoc-06-568962	Completed	07:38:34	Muthulakshmi R	Aswini M	10	Divya V	2021-03-21 09:29:42	2021-03-21 10:04:54																												21-Mar-2021		21-Mar-2021
1	2021-03-21	fnut-08-613100	Completed	07:51:47	Sathya R	Sumithra P	5	Maheswari D	2021-03-21 10:01:33	2021-03-21 10:17:40																												21-Mar-2021		21-Mar-2021
1	2021-03-21	fsurg-08-625394	Completed	08:04:33	Priyadharshini S	Kalaivani R	10	Maheswari D	2021-03-21 10:42:57	2021-03-21 10:46:39																												21-Mar-2021		21-Mar-2021
1	2021-03-21	fnbot-15-638633	Completed	08:06:44	Siva Sankar Narayanan M	Punniyamoorthy K	5	Divya V	2021-03-21 09:21:06	2021-03-21 09:29:15																												21-Mar-2021		21-Mar-2021
1	2021-03-21	fsurg-08-645935	Completed	08:11:29	Sathya R	Janani M	2	Maheswari D	2021-03-21 10:47:53	2021-03-21 10:50:04																												21-Mar-2021		21-Mar-2021
1	2021-03-21	fnagi-13-646440	Completed	08:13:40	Ajith L	Saravanavel Murugan P	2	Divya V	2021-03-21 08:41:25	2021-03-21 09:07:11																												21-Mar-2021		21-Mar-2021
1	2021-03-21	fpsyg-12-635099	Completed	08:28:57	Prakash A	Saravanavel Murugan P	4	Divya V	2021-03-21 08:29:35	2021-03-21 08:37:33																												21-Mar-2021		21-Mar-2021
1	2021-03-21	fspor-03-638139	Completed	08:41:03	Muthulakshmi R	Aswini M	8	Divya V	2021-03-21 09:51:03	2021-03-21 10:15:55																												21-Mar-2021		21-Mar-2021
1	2021-03-21	fneur-12-625443	Completed	08:57:12	Ajith L	Senthilkumar	2	Divya V	2021-03-21 09:07:21	2021-03-21 10:14:07																												21-Mar-2021		21-Mar-2021
1	2021-03-21	frobt-08-625094	Completed	08:59:24	Siva Sankar Narayanan M	Durga B	5	Divya V	2021-03-21 09:26:39	2021-03-21 09:37:59																												21-Mar-2021		21-Mar-2021
2	2021-03-21	fvets-08-631716	Completed	09:01:00	Sathya R	Senthilkumar	5	Maheswari D	2021-03-21 10:50:13	2021-03-21 11:12:32	12:02:37	Sathya R	Senthilkumar	1	Maheswari D	2021-03-21 12:59:12	2021-03-21 13:04:54																					21-Mar-2021		21-Mar-2021
1	2021-03-21	fsufs-05-652644	Completed	09:15:47	Sathya R	Saravanavel Murugan P	3	Maheswari D	2021-03-21 11:48:50	2021-03-21 11:53:11																												21-Mar-2021		21-Mar-2021
1	2021-03-21	fpsyg-12-630197	Completed	09:15:45	Prakash A	Janani M	5	Divya V	2021-03-21 10:16:20	2021-03-21 10:26:09																												21-Mar-2021		21-Mar-2021
1	2021-03-21	fonc-11-621825	Completed	09:39:55	Priyadharshini S	Nathiya S	8	Maheswari D	2021-03-21 11:12:44	2021-03-21 11:24:56																												21-Mar-2021		21-Mar-2021
1	2021-03-21	fonc-11-626577	Completed	09:42:32	Siva Sankar Narayanan M	Aswini M	5	Divya V	2021-03-21 12:18:14	2021-03-21 13:01:21																												21-Mar-2021		21-Mar-2021
1	2021-03-21	fvets-08-648774	Completed	09:48:00	Sathya R	Sridhar G	3	Maheswari D	2021-03-21 11:30:50	2021-03-21 11:36:04																												21-Mar-2021		21-Mar-2021
1	2021-03-21	fvets-08-662370	Completed	09:55:51	Amshaveni N	Durga B	2	Maheswari D	2021-03-21 11:25:15	2021-03-21 11:30:20																												21-Mar-2021		21-Mar-2021
1	2021-03-21	fneur-12-596006	Completed	10:08:17	Ajith L	Nathiya S	3	Divya V	2021-03-21 10:14:22	2021-03-21 10:57:17																												21-Mar-2021		21-Mar-2021
1	2021-03-21	fphys-12-662878	Completed	10:20:22	Ajith L	Sridhar G	1	Divya V	2021-03-21 10:24:08	2021-03-21 10:30:50																												21-Mar-2021		21-Mar-2021
1	2021-03-21	fagro-03-648080	Completed	10:20:57	Amshaveni N	Muthu Kumar M	3	Maheswari D	2021-03-21 11:36:25	2021-03-21 11:48:35																												21-Mar-2021		21-Mar-2021
1	2021-03-21	fpsyg-12-614451	Completed	10:22:34	Prakash A	Janani M	5	Divya V	2021-03-21 10:27:08	2021-03-21 10:44:47																												21-Mar-2021		21-Mar-2021
1	2021-03-21	fcell-09-643645	Completed	10:25:29	Sathya R	Saravanavel Murugan P	2	Maheswari D	2021-03-21 12:20:47	2021-03-21 12:28:00																												21-Mar-2021		21-Mar-2021
1	2021-03-21	fped-09-654171	Completed	10:30:45	Dinesh Kumar M	Muthu Kumar M	2	Maheswari D	2021-03-21 11:53:26	2021-03-21 12:00:24																												21-Mar-2021		21-Mar-2021
1	2021-03-21	fbinf-01-660936	Completed	10:36:27	Priyadharshini S	SenthilKumar P	10	Maheswari D	2021-03-21 12:00:37	2021-03-21 12:20:32																												21-Mar-2021		21-Mar-2021
1	2021-03-21	fnbeh-15-586159	Completed	10:39:52	Muthulakshmi R	Aswini M	10	Divya V	2021-03-21 10:54:26	2021-03-21 11:31:40																												21-Mar-2021		21-Mar-2021
1	2021-03-21	fpsyg-12-666289	Completed	10:48:47	Ajith L	Punniyamoorthy K	1	Divya V	2021-03-21 11:32:03	2021-03-21 11:43:10																												21-Mar-2021		21-Mar-2021
1	2021-03-21	fcomm-06-659484	Completed	10:50:49	Dinesh Kumar M	Sumithra P	2	Maheswari D	2021-03-21 12:28:11	2021-03-21 12:32:51																												21-Mar-2021		21-Mar-2021
2	2021-03-21	fcomp-03-531713	Completed	10:54:34	Amshaveni N	Gopala Krishnan R	1				13:19:48	Amshaveni N	Gopala Krishnan R	2	Maheswari D	2021-03-21 13:23:21	2021-03-21 13:31:09																					21-Mar-2021		00-Jan-1900
1	2021-03-21	fpsyt-12-644324	Completed	10:55:47	Siva Sankar Narayanan M	Durga B	5	Divya V	2021-03-21 12:48:28	2021-03-21 14:53:07																												21-Mar-2021		21-Mar-2021
1	2021-03-21	fpls-12-634959	Completed	11:00:20	Prakash A	Sridhar G	8	Divya V	2021-03-21 12:03:55	2021-03-21 14:37:54																												21-Mar-2021		21-Mar-2021
1	2021-03-21	fmed-08-649392	Completed	11:17:11	Dinesh Kumar M	Gopala Krishnan R	2	Maheswari D	2021-03-21 12:40:54	2021-03-21 12:51:03																												21-Mar-2021		21-Mar-2021
1	2021-03-21	fimmu-12-641307	Completed	11:17:16	Ajith L	Aswini M	1	Divya V	2021-03-21 11:38:34	2021-03-21 11:53:39																												21-Mar-2021		21-Mar-2021
1	2021-03-21	fpubh-09-616750	Completed	11:23:55	Muthulakshmi R	Aswini M	5	Divya V	2021-03-21 11:43:19	2021-03-21 11:53:16																												21-Mar-2021		21-Mar-2021
1	2021-03-21	fpsyg-12-660721	Completed	11:41:28	Sathya R	Divya A	2	Maheswari D	2021-03-21 13:05:17	2021-03-21 13:10:37																												21-Mar-2021		21-Mar-2021
1	2021-03-21	fcell-09-649626	Completed	11:41:41	Priyadharshini S	Sridhar G	10	Maheswari D	2021-03-21 12:33:07	2021-03-21 12:40:18																												21-Mar-2021		21-Mar-2021
1	2021-03-21	fnana-15-632549	Completed	11:43:54	Muthulakshmi R	Kalaivani R	5	Divya V	2021-03-21 11:54:14	2021-03-21 12:03:37																												21-Mar-2021		21-Mar-2021
1	2021-03-21	fneur-12-613834	Completed	11:46:41	Ajith L	Sumithra P	1	Divya V	2021-03-21 13:06:30	2021-03-21 13:43:24																												21-Mar-2021		21-Mar-2021
1	2021-03-21	fped-09-654537	Completed	12:00:11	Prakash A	Durga B	5	Divya V	2021-03-21 12:09:39	2021-03-21 12:21:10																												21-Mar-2021		21-Mar-2021
1	2021-03-21	fped-09-645060	Completed	12:05:25	Dinesh Kumar M	Divya A	2	Maheswari D	2021-03-21 14:08:19	2021-03-21 14:23:29																												21-Mar-2021		21-Mar-2021
1	2021-03-21	fmed-08-642496	Completed	12:25:08	Priyadharshini S	Janani K	10	Maheswari D	2021-03-21 13:10:50	2021-03-21 13:16:45																												21-Mar-2021		21-Mar-2021
2	2021-03-21	feart-09-617662	Completed	12:31:52	Ajith L	Nathiya S	5	Divya V	2021-03-21 13:40:45	2021-03-21 14:04:28	14:07:42	Ajith L	Nathiya S	1	Divya V	2021-03-21 14:31:33	2021-03-21 14:31:41																					21-Mar-2021		21-Mar-2021
1	2021-03-21	fpsyg-12-668883	Completed	12:34:58	Sathya R	Divya A	3	Maheswari D	2021-03-21 13:31:27	2021-03-21 13:37:20																												21-Mar-2021		21-Mar-2021
1	2021-03-21	fcvm-08-645724	Completed	12:42:35	Prakash A	Divya A	5	Divya V	2021-03-21 12:49:59	2021-03-21 13:05:47																												21-Mar-2021		21-Mar-2021
1	2021-03-21	fpsyg-12-585321	Completed	12:52:37	Amshaveni N	Gopala Krishnan R	10	Gopala Krishnan R	2021-03-22 15:57:35	2021-03-22 15:57:41																												21-Mar-2021		22-Mar-2021
1	2021-03-21	fpubh-09-657276	Completed	12:54:04	Sathya R	Divya A	3	Maheswari D	2021-03-21 13:38:29	2021-03-21 13:44:01																												21-Mar-2021		21-Mar-2021
1	2021-03-21	fpsyg-12-615489	Completed	12:55:45	Dinesh Kumar M	Sridhar G	2	Maheswari D	2021-03-21 14:23:59	2021-03-21 15:15:14																												21-Mar-2021		21-Mar-2021
1	2021-03-21	fcvm-08-660698	Completed	13:06:56	Sathya R	Janani K	3	Maheswari D	2021-03-21 13:50:41	2021-03-21 13:59:56																												21-Mar-2021		21-Mar-2021
1	2021-03-21	fvets-08-640944	Completed	13:08:51	Priyadharshini S	Divya A	10	Maheswari D	2021-03-21 14:00:09	2021-03-21 14:03:06																												21-Mar-2021		21-Mar-2021
1	2021-03-21	fgene-12-656107	Completed	13:17:15	Prakash A	Janani K	4	Divya V	2021-03-21 13:54:56	2021-03-21 14:11:47																												21-Mar-2021		21-Mar-2021
1	2021-03-21	fcvm-08-609300	Completed	13:31:07	Amshaveni N	Saravanavel Murugan P	2	Maheswari D	2021-03-21 13:44:24	2021-03-21 13:48:57																												21-Mar-2021		21-Mar-2021
1	2021-03-21	fgene-12-658078	Completed	13:53:46	Prakash A	Janani K	5	Maheswari D	2021-03-21 14:03:20	2021-03-21 14:07:41																												21-Mar-2021		21-Mar-2021
1	2021-03-21	fpsyt-12-654602	Completed	13:57:59	Dinesh Kumar M	Janani M	2	Maheswari D	2021-03-21 15:15:27	2021-03-21 15:27:39																												21-Mar-2021		21-Mar-2021
1	2021-03-21	fpsyg-12-588193	Completed	14:48:33	Priyadharshini S	SenthilKumar P	10	Maheswari D	2021-03-21 15:27:47	2021-03-21 15:33:22																												21-Mar-2021		21-Mar-2021
1	2021-03-21	fonc-11-638288	Completed	15:05:09	Dinesh Kumar M	Janani M	2	Maheswari D	2021-03-21 15:36:53	2021-03-21 15:42:36																												21-Mar-2021		21-Mar-2021
1	2021-03-21	fgene-12-649959	Completed	15:12:45	Priyadharshini S	Punniyamoorthy K	2	Maheswari D	2021-03-21 15:33:43	2021-03-21 15:36:44																												21-Mar-2021		21-Mar-2021
1	2021-03-22	feart-09-636156	Completed	00:30:25	Thomas S	SenthilKumar P	5	Maheswari D	2021-03-22 07:05:51	2021-03-22 07:19:47																												22-Mar-2021		22-Mar-2021
1	2021-03-22	fmech-07-651149	Completed	01:49:03	Thomas S	Sridhar G	5	Maheswari D	2021-03-22 07:20:00	2021-03-22 12:18:27																												22-Mar-2021		22-Mar-2021
1	2021-03-22	fmed-08-626000	Completed	04:07:19	Thomas S	Aswini M	5	Maheswari D	2021-03-22 08:02:04	2021-03-22 08:10:55																												22-Mar-2021		22-Mar-2021
1	2021-03-22	fnut-08-655727	Completed	04:22:20	Thomas S	Kalaivani R	5	Maheswari D	2021-03-22 08:11:31	2021-03-22 08:15:43																												22-Mar-2021		22-Mar-2021
1	2021-03-22	fonc-11-582676	Completed	04:43:34	Thomas S	Gopala Krishnan R	5	Maheswari D	2021-03-22 08:16:28	2021-03-22 08:26:22																												22-Mar-2021		22-Mar-2021
1	2021-03-22	fsufs-05-544072	Completed	05:00:46	Thomas S	Sumithra P	5	Maheswari D	2021-03-22 07:51:25	2021-03-22 07:57:06																												22-Mar-2021		22-Mar-2021
1	2021-03-22	fchem-09-641610	Completed	06:47:53	Ajith L	Janani K	3	Divya V	2021-03-22 07:12:16	2021-03-22 07:27:27																												22-Mar-2021		22-Mar-2021
2	2021-03-22	fmed-08-642296	Completed	07:20:13	Gowthami L	SenthilKumar P	2	Maheswari D	2021-03-22 07:36:13	2021-03-22 07:42:54	08:36:10	Gowthami L	Muthu Kumar M	1	Maheswari D	2021-03-22 08:40:03	2021-03-22 08:40:11																					22-Mar-2021		22-Mar-2021
1	2021-03-22	fpubh-09-585235	Completed	07:23:49	Gowthami L	SenthilKumar P	1	Maheswari D	2021-03-22 07:44:06	2021-03-22 07:51:17																												22-Mar-2021		22-Mar-2021
1	2021-03-22	fclim-03-619338	Completed	07:28:37	Ajith L	Janani K	3	Divya V	2021-03-22 07:52:28	2021-03-22 08:03:45																												22-Mar-2021		22-Mar-2021
1	2021-03-22	fcvm-08-631807	Completed	07:57:02	Ajith L	Janani K	3	Divya V	2021-03-22 08:04:06	2021-03-22 08:14:48																												22-Mar-2021		22-Mar-2021
1	2021-03-22	fcvm-08-655575	Completed	08:13:21	Ajith L	Janani K	1	Divya V	2021-03-22 08:15:01	2021-03-22 08:22:57																												22-Mar-2021		22-Mar-2021
1	2021-03-22	fpsyg-12-644782	Completed	08:16:37	Prakash A	Janani K	4	Divya V	2021-03-22 08:23:34	2021-03-22 08:31:49																												22-Mar-2021		22-Mar-2021
1	2021-03-22	fpsyg-12-638004	Completed	08:27:43	Gowthami L	Muthu Kumar M	5	Maheswari D	2021-03-22 08:29:35	2021-03-22 09:01:32																												22-Mar-2021		22-Mar-2021
1	2021-03-22	fped-09-640780	Completed	08:32:50	Prakash A	Muthu Kumar M	4	Divya V	2021-03-22 08:35:42	2021-03-22 08:42:46																												22-Mar-2021		22-Mar-2021
1	2021-03-22	fpsyg-12-646090	Completed	08:41:25	Thomas S	SenthilKumar P	5	Maheswari D	2021-03-22 09:01:48	2021-03-22 09:28:11																												22-Mar-2021		22-Mar-2021
1	2021-03-22	fpsyg-12-629724	Completed	08:52:06	Uma Y	Kalaivani R	2	Maheswari D	2021-03-22 09:28:28	2021-03-22 09:33:28																												22-Mar-2021		22-Mar-2021
1	2021-03-22	fsufs-05-618453	Completed	08:58:41	Muthulakshmi R	SenthilKumar P	15	Divya V	2021-03-22 09:37:45	2021-03-22 12:36:53																												22-Mar-2021		22-Mar-2021
1	2021-03-22	fcvm-08-649922	Completed	09:01:16	Dinesh Kumar M	Sridhar G	2	Divya V	2021-03-22 09:04:07	2021-03-22 09:36:03																												22-Mar-2021		22-Mar-2021
1	2021-03-22	fmed-08-633442	Completed	09:05:14	Prakash A	Senthilkumar	4	Divya V	2021-03-22 09:50:37	2021-03-22 10:08:20																												22-Mar-2021		22-Mar-2021
2	2021-03-22	fenrg-09-653542	Completed	09:14:34	Ajith L	Senthilkumar	2	Divya V	2021-03-22 11:39:17	2021-03-22 12:12:43	12:54:09	Ajith L	Senthilkumar	1	Divya V	2021-03-22 13:09:24	2021-03-22 13:09:31																					22-Mar-2021		22-Mar-2021
1	2021-03-22	fpsyt-12-631589	Completed	09:20:17	Uma Y	Kalaivani R	3	Maheswari D	2021-03-22 09:33:53	2021-03-22 10:08:08																												22-Mar-2021		22-Mar-2021
1	2021-03-22	fmed-08-606755	Completed	09:35:36	Ajith L	Janani K	1	Divya V	2021-03-22 10:14:47	2021-03-22 10:41:33																												22-Mar-2021		22-Mar-2021
1	2021-03-22	fmed-08-640799	Completed	09:44:44	Prakash A	Janani K	5	Divya V	2021-03-22 10:05:30	2021-03-22 10:14:33																												22-Mar-2021		22-Mar-2021
1	2021-03-22	fpsyt-12-632519	Completed	09:55:33	Dinesh Kumar M	Saravanavel Murugan P	2	Divya V	2021-03-22 10:42:55	2021-03-22 11:37:00																												22-Mar-2021		22-Mar-2021
1	2021-03-22	fmed-08-640785	Completed	10:09:37	Ajith L	Janani K	3	Divya V	2021-03-22 11:59:14	2021-03-22 12:16:42																												22-Mar-2021		22-Mar-2021
1	2021-03-22	fpsyt-12-638359	Completed	10:14:40	Uma Y	Kalaivani R	6	Maheswari D	2021-03-22 10:29:30	2021-03-22 10:48:04																												22-Mar-2021		22-Mar-2021
1	2021-03-22	fvets-08-655345	Completed	10:26:48	Renganath K	Senthilkumar	10	Maheswari D	2021-03-22 10:48:15	2021-03-22 10:54:37																												22-Mar-2021		22-Mar-2021
1	2021-03-22	frobt-08-645956	Completed	10:31:59	Gowthami L	Janani K	5	Maheswari D	2021-03-22 10:54:48	2021-03-22 12:42:07																												22-Mar-2021		22-Mar-2021
1	2021-03-22	fpubh-09-645665	Completed	10:35:44	Ajith L	Senthilkumar	1	Divya V	2021-03-22 10:41:47	2021-03-22 11:07:14																												22-Mar-2021		22-Mar-2021
1	2021-03-22	fpsyg-12-625381	Completed	10:40:37	Prakash A	Senthilkumar	8	Divya V	2021-03-22 11:27:33	2021-03-22 11:46:53																												22-Mar-2021		22-Mar-2021
1	2021-03-22	fpsyt-12-626944	Completed	10:52:25	Uma Y	Kalaivani R	5	Maheswari D	2021-03-22 12:23:42	2021-03-22 12:31:12																												22-Mar-2021		22-Mar-2021
3	2021-03-22	fpsyg-12-605886	Completed	10:56:03	Manoj B	Sridhar G	1	Gowtham M	2021-03-22 16:08:04	2021-03-22 16:23:46	19:58:35	Gowrishankar S	Sridhar G	1	Gowtham M	2021-03-22 20:02:52	2021-03-22 20:09:19	21:52:39	Gowrishankar S	Sridhar G	1	Santhosh Kumar L	2021-03-22 22:19:31	2021-03-22 22:19:39														22-Mar-2021		22-Mar-2021
1	2021-03-22	fneur-12-626787	Completed	11:03:39	Ajith L	Nathiya S	2	Divya V	2021-03-22 13:09:43	2021-03-22 13:26:10																												22-Mar-2021		22-Mar-2021
1	2021-03-22	fvets-08-648766	Completed	11:13:18	Gowthami L	SenthilKumar P	4	Maheswari D	2021-03-22 12:01:04	2021-03-22 12:10:49																												22-Mar-2021		22-Mar-2021
1	2021-03-22	fped-09-624652	Completed	11:23:22	Ajith L	Sridhar G	4	Divya V	2021-03-22 13:14:03	2021-03-22 13:31:05																												22-Mar-2021		22-Mar-2021
1	2021-03-22	fpsyg-12-636129	Completed	11:35:29	Prakash A	Nathiya S	4	Divya V	2021-03-22 12:41:41	2021-03-22 12:53:07																												22-Mar-2021		22-Mar-2021
1	2021-03-22	fsufs-05-613269	Completed	11:36:44	Dinesh Kumar M	Aswini M	0	Divya V	2021-03-22 12:30:52	2021-03-22 12:44:23																												22-Mar-2021		22-Mar-2021
1	2021-03-22	fpsyt-12-623403	Completed	11:39:31	Muthulakshmi R	Muthu Kumar M	5	Divya V	2021-03-22 12:44:56	2021-03-22 15:05:27																												22-Mar-2021		22-Mar-2021
1	2021-03-22	fmed-08-625647	Completed	11:52:10	Uma Y	Kalaivani R	8	Maheswari D	2021-03-22 12:42:39	2021-03-22 12:55:08																												22-Mar-2021		22-Mar-2021
1	2021-03-22	fdgth-03-636082	Completed	12:25:32	Dinesh Kumar M	Punniyamoorthy K	2	Divya V	2021-03-22 12:37:14	2021-03-22 12:44:40																												22-Mar-2021		22-Mar-2021
1	2021-03-22	fpls-12-646144	Completed	12:26:13	Muthulakshmi R	Muthu Kumar M	5	Divya V	2021-03-22 12:51:48	2021-03-22 13:13:40																												22-Mar-2021		22-Mar-2021
1	2021-03-22	fmed-08-624924	Completed	12:27:15	Thomas S	Kalaivani R	5	Maheswari D	2021-03-22 12:55:20	2021-03-22 13:54:53																												22-Mar-2021		22-Mar-2021
1	2021-03-22	fncel-15-629279	Completed	12:29:55	Uma Y	Kalaivani R	8	Maheswari D	2021-03-22 13:19:49	2021-03-22 13:42:30																												22-Mar-2021		22-Mar-2021
1	2021-03-22	fped-09-648927	Completed	12:45:00	Ajith L	Kalaivani R	11	Divya V	2021-03-22 13:42:38	2021-03-22 14:25:53																												22-Mar-2021		22-Mar-2021
1	2021-03-22	fpsyg-12-639955	Completed	12:50:34	Gowthami L	Nathiya S	5	Maheswari D	2021-03-22 13:47:18	2021-03-22 13:51:13																												22-Mar-2021		22-Mar-2021
1	2021-03-22	fmicb-12-659907	Completed	12:50:45	Dinesh Kumar M	Muthu Kumar M	2	Divya V	2021-03-22 13:21:20	2021-03-22 13:36:41																												22-Mar-2021		22-Mar-2021
1	2021-03-22	fpsyg-12-635690	Completed	12:57:11	Muthulakshmi R	Muthu Kumar M	10	Divya V	2021-03-22 13:39:20	2021-03-22 14:37:43																												22-Mar-2021		22-Mar-2021
1	2021-03-22	fmed-08-656194	Completed	13:07:02	Prakash A	Kalaivani R	4	Divya V	2021-03-22 13:31:22	2021-03-22 13:45:21																												22-Mar-2021		22-Mar-2021
2	2021-03-22	fpsyg-12-583722	Completed	13:18:54	Sathya R	Kalaivani R	1	Maheswari D	2021-03-22 13:42:44	2021-03-22 13:47:10	13:53:29	Sathya R	Kalaivani R	1	Maheswari D	2021-03-22 14:14:18	2021-03-22 14:17:47																					22-Mar-2021		22-Mar-2021
1	2021-03-22	fmed-08-641633	Completed	13:36:33	Thomas S	Punniyamoorthy K	5	Maheswari D	2021-03-22 13:56:45	2021-03-22 13:58:28																												22-Mar-2021		22-Mar-2021
1	2021-03-22	fonc-11-647179	Completed	13:45:39	Gowthami L	Senthilkumar	5	Maheswari D	2021-03-22 13:58:35	2021-03-22 14:03:52																												22-Mar-2021		22-Mar-2021
1	2021-03-22	fchem-09-624511	Completed	13:48:36	Muthulakshmi R	Muthu Kumar M	20	Maheswari D	2021-03-22 14:10:59	2021-03-22 15:09:13																												22-Mar-2021		22-Mar-2021
2	2021-03-22	fphys-12-665568	Completed	14:12:24	Sathya R	Sridhar G	3	Gowtham M	2021-03-22 14:26:45	2021-03-22 14:31:51	19:19:53	Sathya R	Sridhar G	1	Gowtham M	2021-03-22 19:56:58	2021-03-22 20:01:21																					22-Mar-2021		22-Mar-2021
1	2021-03-22	fneur-12-630221	Completed	14:16:55	Manoj B	Muthu Kumar M	2	Gowtham M	2021-03-22 16:23:55	2021-03-22 16:35:09																												22-Mar-2021		22-Mar-2021
1	2021-03-22	fcvm-08-648265	Completed	14:20:48	Gowthami L	Sridhar G	4	Maheswari D	2021-03-22 14:26:02	2021-03-22 14:40:53																												22-Mar-2021		22-Mar-2021
1	2021-03-22	fpls-12-676617	Completed	14:23:24	Sathya R	Muthu Kumar M	3	Gowtham M	2021-03-22 14:32:04	2021-03-22 14:35:33																												22-Mar-2021		22-Mar-2021
1	2021-03-22	fneur-12-674626	Completed	14:27:17	Thomas S	Durga B	5	Maheswari D	2021-03-22 14:37:25	2021-03-22 14:38:36																												22-Mar-2021		22-Mar-2021
1	2021-03-22	fpls-12-660620	Completed	14:39:56	Gowthami L	Senthilkumar	4	Maheswari D	2021-03-22 14:41:05	2021-03-22 14:48:54																												22-Mar-2021		22-Mar-2021
1	2021-03-22	fpsyt-12-551924	Completed	14:51:56	Sathya R	Senthilkumar	3	Gowtham M	2021-03-22 15:48:59	2021-03-22 15:59:46																												22-Mar-2021		22-Mar-2021
1	2021-03-22	frwa-03-603531	Completed	14:57:17	Priyadharshini S	Punniyamoorthy K	5	Gowtham M	2021-03-22 15:27:14	2021-03-22 15:36:15																												22-Mar-2021		22-Mar-2021
1	2021-03-22	fpsyg-12-604291	Completed	15:06:10	Priyadharshini S	Punniyamoorthy K	5	Gowtham M	2021-03-22 15:36:20	2021-03-22 15:48:50																												22-Mar-2021		22-Mar-2021
1	2021-03-22	fphy-09-654271	Completed	15:14:40	Manoj B	Divya A	3	Gowtham M	2021-03-22 16:36:26	2021-03-22 16:47:14																												22-Mar-2021		22-Mar-2021
1	2021-03-22	fpsyt-12-642799	Completed	15:46:31	Mahalingam K	Kalaivani R	9	Santhosh Kumar L	2021-03-22 15:51:25	2021-03-22 15:54:21																												22-Mar-2021		22-Mar-2021
1	2021-03-22	fpsyt-12-630730	Completed	16:03:55	Siva Sankar Narayanan M	SenthilKumar P	5	Santhosh Kumar L	2021-03-22 16:17:28	2021-03-22 16:24:53																												22-Mar-2021		22-Mar-2021
1	2021-03-22	frym-09-553496	Completed	16:06:10	Sathya R	Nathiya S	3	Sanjay Kumar T	2021-03-22 19:48:07	2021-03-22 19:50:15																												22-Mar-2021		22-Mar-2021
1	2021-03-22	fphy-09-622303	Completed	16:07:46	Gowrishankar S	Sumithra P	5	Santhosh Kumar L	2021-03-22 16:25:02	2021-03-22 16:33:43																												22-Mar-2021		22-Mar-2021
1	2021-03-22	fimmu-12-626308	Completed	16:08:18	Priyadharshini S	Sridhar G	10	Gowtham M	2021-03-22 16:47:33	2021-03-22 17:01:53																												22-Mar-2021		22-Mar-2021
1	2021-03-22	fcvm-08-571076	Completed	16:28:21	Buvanenthiran P	Gopala Krishnan R	1	Santhosh Kumar L	2021-03-22 16:33:57	2021-03-22 16:52:52																												22-Mar-2021		22-Mar-2021
1	2021-03-22	frwa-03-641462	Completed	16:35:39	Mahalingam K	Muthu Kumar M	17	Santhosh Kumar L	2021-03-22 16:52:58	2021-03-22 17:08:53																												22-Mar-2021		22-Mar-2021
1	2021-03-22	fonc-11-621690	Completed	16:47:27	Manoj B	Divya A	3	Gowtham M	2021-03-22 17:42:35	2021-03-22 17:57:48																												22-Mar-2021		22-Mar-2021
1	2021-03-22	fncom-15-580107	Completed	16:49:11	Priyadharshini S	Sridhar G	10	Gowtham M	2021-03-22 17:02:24	2021-03-22 17:32:39																												22-Mar-2021		22-Mar-2021
1	2021-03-22	frym-09-570445	Completed	16:51:44	Sathya R	Nathiya S	3	Sanjay Kumar T	2021-03-22 19:50:50	2021-03-22 19:53:18																												22-Mar-2021		22-Mar-2021
1	2021-03-22	fpsyg-12-647821	Completed	17:06:09	Siva Sankar Narayanan M	Senthilkumar	5	Santhosh Kumar L	2021-03-22 17:09:03	2021-03-22 17:27:14																												22-Mar-2021		22-Mar-2021
1	2021-03-22	fcell-09-672685	Completed	17:19:18	Sathya R	Sumithra P	3	Gowtham M	2021-03-22 17:58:45	2021-03-22 18:05:50																												22-Mar-2021		22-Mar-2021
1	2021-03-22	fpsyt-12-611069	Completed	17:34:21	Siva Sankar Narayanan M	Sridhar G	5	Santhosh Kumar L	2021-03-22 17:45:45	2021-03-22 17:53:27																												22-Mar-2021		22-Mar-2021
1	2021-03-22	fsurg-08-662744	Completed	17:55:54	Siva Sankar Narayanan M	Sridhar G	5	Santhosh Kumar L	2021-03-22 17:57:35	2021-03-22 18:07:08																												22-Mar-2021		22-Mar-2021
1	2021-03-22	fnins-15-671836	Completed	18:00:17	Priyadharshini S	Durga B	10	Gowtham M	2021-03-22 18:06:25	2021-03-22 18:14:54																												22-Mar-2021		22-Mar-2021
1	2021-03-22	fcvm-08-638929	Completed	18:06:12	Mahalingam K	Sumithra P	7	Santhosh Kumar L	2021-03-22 18:07:14	2021-03-22 18:17:02																												22-Mar-2021		22-Mar-2021
1	2021-03-22	fcomm-06-627316	Completed	18:27:09	Gowrishankar S	Janani K	2	Santhosh Kumar L	2021-03-22 18:31:11	2021-03-22 18:36:47																												22-Mar-2021		22-Mar-2021
1	2021-03-22	fgene-12-612670	Completed	18:32:02	Mahalingam K	Muthu Kumar M	7	Santhosh Kumar L	2021-03-22 18:37:02	2021-03-22 18:39:55																												22-Mar-2021		22-Mar-2021
1	2021-03-22	fsurg-08-624124	Completed	18:37:59	Siva Sankar Narayanan M	Sumithra P	5	Santhosh Kumar L	2021-03-22 18:40:03	2021-03-22 18:58:41																												22-Mar-2021		22-Mar-2021
1	2021-03-22	fpubh-09-649447	Completed	19:03:14	Priyadharshini S	Durga B	10	Gowtham M	2021-03-22 19:27:39	2021-03-22 19:56:24																												22-Mar-2021		22-Mar-2021
1	2021-03-22	fped-09-597519	Completed	19:04:36	Sathya R	Divya A	3	Gowtham M	2021-03-22 19:05:36	2021-03-22 19:17:17																												22-Mar-2021		22-Mar-2021
1	2021-03-22	froh-02-638213	Completed	19:05:54	Siva Sankar Narayanan M	Sridhar G	5	Santhosh Kumar L	2021-03-22 19:09:39	2021-03-22 19:20:10																												22-Mar-2021		22-Mar-2021
1	2021-03-22	fpsyg-12-665606	Completed	19:13:44	Sathya R	Gopala Krishnan R	2	Gowtham M	2021-03-22 19:17:37	2021-03-22 19:27:23																												22-Mar-2021		22-Mar-2021
1	2021-03-22	fmed-08-653294	Completed	19:14:01	Mahalingam K	Kalaivani R	11	Santhosh Kumar L	2021-03-22 19:20:18	2021-03-22 19:36:42																												22-Mar-2021		22-Mar-2021
1	2021-03-22	fnhum-15-620439	Completed	19:37:43	Gowrishankar S	SenthilKumar P	7	Santhosh Kumar L	2021-03-22 19:42:27	2021-03-22 19:55:07																												22-Mar-2021		22-Mar-2021
1	2021-03-22	fpsyt-12-648475	Completed	19:47:52	Siva Sankar Narayanan M	Senthilkumar	5	Santhosh Kumar L	2021-03-22 19:55:16	2021-03-22 20:08:48																												22-Mar-2021		22-Mar-2021
1	2021-03-22	fsoc-06-617895	Completed	20:24:22	Priyadharshini S	Senthilkumar	10	Gowtham M	2021-03-22 20:41:48	2021-03-22 20:57:11																												22-Mar-2021		22-Mar-2021
1	2021-03-22	ffunb-02-655323	Completed	20:28:22	Buvanenthiran P	Durga B	4	Santhosh Kumar L	2021-03-22 20:40:30	2021-03-22 20:48:27																												22-Mar-2021		22-Mar-2021
2	2021-03-22	fnhum-15-630898	Completed	20:37:08	Mahalingam K	Kalaivani R	7	Santhosh Kumar L	2021-03-22 20:48:37	2021-03-22 20:51:54	21:04:09	Mahalingam K	Kalaivani R	11	Santhosh Kumar L	2021-03-22 21:04:36	2021-03-22 21:04:59																					22-Mar-2021		22-Mar-2021
1	2021-03-22	fmed-08-653861	Completed	20:43:51	Siva Sankar Narayanan M	Gopala Krishnan R	4	Santhosh Kumar L	2021-03-22 20:52:01	2021-03-22 20:54:27																												22-Mar-2021		22-Mar-2021
1	2021-03-22	fpsyt-12-557834	Completed	20:54:09	Gowrishankar S	Sridhar G	0	Santhosh Kumar L	2021-03-22 20:54:33	2021-03-22 21:03:18																												22-Mar-2021		22-Mar-2021
1	2021-03-22	fpubh-09-633606	Completed	21:03:29	Priyadharshini S	Sumithra P	1	Gowtham M	2021-03-22 21:21:06	2021-03-22 21:30:28																												22-Mar-2021		22-Mar-2021
1	2021-03-22	fneur-12-643576	Completed	21:33:19	Gowrishankar S	Saravanavel Murugan P	1	Santhosh Kumar L	2021-03-22 21:33:53	2021-03-22 21:36:59																												22-Mar-2021		22-Mar-2021
1	2021-03-23	fchem-09-668336	Completed	06:59:42	Ajith L	Kalaivani R	2	Gowtham M	2021-03-23 11:55:05	2021-03-23 12:02:26																												23-Mar-2021		23-Mar-2021
1	2021-03-23	fpsyt-12-645102	Completed	07:06:17	Ajith L	Kalaivani R	2	Gowtham M	2021-03-23 12:02:31	2021-03-23 12:08:18																												23-Mar-2021		23-Mar-2021
1	2021-03-23	fnbeh-15-641795	Completed	07:10:19	Thomas S	Divya A	5	Maheswari D	2021-03-23 07:11:31	2021-03-23 09:17:12																												23-Mar-2021		23-Mar-2021
1	2021-03-23	fphy-09-651316	Completed	07:13:29	Ajith L	Kalaivani R	2	Gowtham M	2021-03-23 12:08:28	2021-03-23 12:12:45																												23-Mar-2021		23-Mar-2021
1	2021-03-23	fneur-12-596006	Completed	07:14:49	Ajith L	Kalaivani R	12	Gowtham M	2021-03-23 12:13:01	2021-03-23 15:20:12																												23-Mar-2021		23-Mar-2021
1	2021-03-23	fped-09-613292	Completed	07:24:16	Muthulakshmi R	Aswini M	5	Gowtham M	2021-03-23 13:42:40	2021-03-23 14:03:28																												23-Mar-2021		23-Mar-2021
1	2021-03-23	fonc-11-607989	Completed	07:51:22	Muthulakshmi R	Aswini M	3	Gowtham M	2021-03-23 12:27:22	2021-03-23 12:32:39																												23-Mar-2021		23-Mar-2021
1	2021-03-23	fpsyg-12-643395	Completed	08:07:36	Dinesh Kumar M	Gopala Krishnan R	2	Muthu Kumar M	2021-03-23 11:15:58	2021-03-23 11:21:37																												23-Mar-2021		23-Mar-2021
1	2021-03-23	fpsyg-12-627841	Completed	08:24:24	Uma Y	SenthilKumar P	20	Maheswari D	2021-03-23 09:17:46	2021-03-23 12:20:21																												23-Mar-2021		23-Mar-2021
1	2021-03-23	frvir-02-647896	Completed	08:43:02	Uma Y	SenthilKumar P	2	Maheswari D	2021-03-23 10:35:20	2021-03-23 10:38:45																												23-Mar-2021		23-Mar-2021
1	2021-03-23	fevo-09-625519	Completed	09:00:49	Prakash A	SenthilKumar P	8	Muthu Kumar M	2021-03-23 10:33:39	2021-03-23 10:52:00																												23-Mar-2021		23-Mar-2021
1	2021-03-23	fpsyg-12-647065	Completed	09:06:02	Uma Y	SenthilKumar P	3	Maheswari D	2021-03-23 13:46:20	2021-03-23 13:49:03																												23-Mar-2021		23-Mar-2021
1	2021-03-23	fneur-12-631220	Completed	09:20:39	Prakash A	Saravanavel Murugan P	5	Muthu Kumar M	2021-03-23 10:55:08	2021-03-23 11:04:45																												23-Mar-2021		23-Mar-2021
1	2021-03-23	fnut-08-624283	Completed	09:25:26	Dinesh Kumar M	Gopala Krishnan R	2	Gowtham M	2021-03-23 12:18:35	2021-03-23 12:27:11																												23-Mar-2021		23-Mar-2021
1	2021-03-23	fchem-09-657246	Completed	09:40:40	Renganath K	Saravanavel Murugan P	10	Maheswari D	2021-03-23 10:39:47	2021-03-23 10:45:52																												23-Mar-2021		23-Mar-2021
1	2021-03-23	fneur-12-630221	Completed	10:12:53	Prakash A	Saravanavel Murugan P	4	Muthu Kumar M	2021-03-23 11:05:44	2021-03-23 11:12:29																												23-Mar-2021		23-Mar-2021
1	2021-03-23	fneur-12-640841	Completed	10:30:30	Prakash A	Sumithra P	4	Gowtham M	2021-03-23 12:53:07	2021-03-23 12:58:08																												23-Mar-2021		23-Mar-2021
1	2021-03-23	fsurg-08-652428	Completed	10:32:19	Gowthami L	Janani K	2	Maheswari D	2021-03-23 10:46:26	2021-03-23 11:10:39																												23-Mar-2021		23-Mar-2021
1	2021-03-23	fpsyg-12-628152	Completed	10:33:43	Thomas S	Senthilkumar	5	Maheswari D	2021-03-23 11:11:01	2021-03-23 11:14:39																												23-Mar-2021		23-Mar-2021
1	2021-03-23	fpubh-09-543750	Completed	10:36:25	Dinesh Kumar M	Divya A	3	Gowtham M	2021-03-23 12:32:56	2021-03-23 12:52:56																												23-Mar-2021		23-Mar-2021
3	2021-03-23	fchem-09-670767	Completed	10:43:15	Manoj B	Saravanavel Murugan P	2				15:28:28	Sathya R	Saravanavel Murugan P	3	Sanjay Kumar T	2021-03-23 15:34:09	2021-03-23 15:34:31	19:48:51	Sathya R	Gopala Krishnan R	5	Gowtham M	2021-03-23 19:54:18	2021-03-23 20:02:12														23-Mar-2021		00-Jan-1900
1	2021-03-23	fcvm-08-649181	Completed	10:54:54	Uma Y	Sridhar G	1	Maheswari D	2021-03-23 11:14:52	2021-03-23 11:18:57																												23-Mar-2021		23-Mar-2021
1	2021-03-23	fonc-11-638873	Completed	10:59:30	Gowthami L	Janani K	5	Maheswari D	2021-03-23 11:19:20	2021-03-23 11:26:42																												23-Mar-2021		23-Mar-2021
1	2021-03-23	fsurg-08-590245	Completed	11:12:18	Gowthami L	Janani K	2	Maheswari D	2021-03-23 12:21:55	2021-03-23 12:25:32																												23-Mar-2021		23-Mar-2021
1	2021-03-23	fsufs-05-534616	Completed	11:23:07	Gowthami L	Janani K	2	Maheswari D	2021-03-23 12:25:50	2021-03-23 12:27:19																												23-Mar-2021		23-Mar-2021
1	2021-03-23	fonc-11-621690	Completed	11:30:20	Prakash A	Divya A	5	Gowtham M	2021-03-23 13:03:09	2021-03-23 13:11:39																												23-Mar-2021		23-Mar-2021
1	2021-03-23	fsufs-05-646719	Completed	11:39:02	Renganath K	Muthu Kumar M	10	Maheswari D	2021-03-23 12:31:05	2021-03-23 13:07:37																												23-Mar-2021		23-Mar-2021
1	2021-03-23	fonc-11-628127	Completed	11:41:25	Gowrishankar S	Kalaivani R	7	Santhosh Kumar L	2021-03-23 14:11:29	2021-03-23 14:16:15																												23-Mar-2021		23-Mar-2021
2	2021-03-23	fphy-09-654271	Completed	12:02:53	Prakash A	Divya A	5				12:05:17	Prakash A	Divya A	5	Gowtham M	2021-03-23 13:11:46	2021-03-23 13:19:08																					23-Mar-2021		00-Jan-1900
1	2021-03-23	fneur-12-648702	Completed	12:04:53	Muthulakshmi R	Durga B	5	Gowtham M	2021-03-23 13:19:19	2021-03-23 13:24:21																												23-Mar-2021		23-Mar-2021
1	2021-03-23	fcell-09-641836	Completed	12:25:00	Prakash A	Divya A	4	Saravanavel Murugan P	2021-03-23 13:15:09	2021-03-23 13:20:55																												23-Mar-2021		23-Mar-2021
1	2021-03-23	fpubh-09-658876	Completed	12:26:42	Renganath K	Sumithra P	10	Maheswari D	2021-03-23 13:07:54	2021-03-23 13:11:36																												23-Mar-2021		23-Mar-2021
1	2021-03-23	fspor-03-662203	Completed	12:27:12	Manoj B	Senthilkumar	3	Sanjay Kumar T	2021-03-23 15:34:49	2021-03-23 15:34:58																												23-Mar-2021		23-Mar-2021
1	2021-03-23	fpsyg-12-566220	Completed	12:29:14	Amshaveni N	Kalaivani R	5	Maheswari D	2021-03-23 13:52:34	2021-03-23 13:57:42																												23-Mar-2021		23-Mar-2021
1	2021-03-23	fpsyt-12-517411	Completed	12:31:55	Muthulakshmi R	Durga B	4	Gowtham M	2021-03-23 13:24:26	2021-03-23 13:42:34																												23-Mar-2021		23-Mar-2021
1	2021-03-23	fneur-12-638574	Completed	12:42:38	Gowthami L	Gopala Krishnan R	2	Maheswari D	2021-03-23 14:11:25	2021-03-23 15:07:00																												23-Mar-2021		23-Mar-2021
1	2021-03-23	fpsyg-12-601200	Completed	12:48:52	Gowthami L	Gopala Krishnan R	2	Maheswari D	2021-03-23 15:08:02	2021-03-23 15:10:19																												23-Mar-2021		23-Mar-2021
1	2021-03-23	fneur-12-637198	Completed	12:55:37	Renganath K	Saravanavel Murugan P	10	Maheswari D	2021-03-23 14:19:13	2021-03-23 14:22:05																												23-Mar-2021		23-Mar-2021
1	2021-03-23	fphy-09-650353	Completed	13:00:38	Prakash A	Nathiya S	5	Saravanavel Murugan P	2021-03-23 14:02:52	2021-03-23 14:08:14																												23-Mar-2021		23-Mar-2021
1	2021-03-23	fpsyg-12-611228	Completed	13:03:09	Gowrishankar S	SenthilKumar P	8	Santhosh Kumar L	2021-03-23 14:16:21	2021-03-23 14:24:44																												23-Mar-2021		23-Mar-2021
1	2021-03-23	fragi-02-629164	Completed	13:25:17	Amshaveni N	Kalaivani R	5	Maheswari D	2021-03-23 13:58:05	2021-03-23 14:02:27																												23-Mar-2021		23-Mar-2021
1	2021-03-23	fpsyg-12-645926	Completed	13:28:35	Ajith L	Kalaivani R	2	Gowtham M	2021-03-23 17:19:15	2021-03-23 17:43:15																												23-Mar-2021		23-Mar-2021
1	2021-03-23	fpubh-09-615597	Completed	13:33:45	Gowthami L	Senthilkumar	4	Maheswari D	2021-03-23 15:10:40	2021-03-23 15:13:00																												23-Mar-2021		23-Mar-2021
1	2021-03-23	fenrg-09-640337	Completed	13:37:17	Gowrishankar S	Gopala Krishnan R	4	Santhosh Kumar L	2021-03-23 14:31:48	2021-03-23 14:35:19																												23-Mar-2021		23-Mar-2021
1	2021-03-23	fneur-12-634782	Completed	13:44:49	Ajith L	Kalaivani R	2	Santhosh Kumar L	2021-03-23 16:03:22	2021-03-23 16:05:27																												23-Mar-2021		23-Mar-2021
1	2021-03-23	fcvm-08-652761	Completed	14:04:49	Thomas S	SenthilKumar P	5	Maheswari D	2021-03-23 14:22:35	2021-03-23 14:26:02																												23-Mar-2021		23-Mar-2021
3	2021-03-23	fmed-08-654700	Completed	14:09:43	Manoj B	Divya A	4	Sanjay Kumar T	2021-03-23 15:35:15	2021-03-23 15:35:20	17:30:10	Sathya R	Divya A	3	Gowtham M	2021-03-23 19:40:38	2021-03-23 19:50:40	20:04:25	Sathya R	Divya A	1	Gowtham M	2021-03-23 20:41:49	2021-03-23 20:45:40														23-Mar-2021		23-Mar-2021
1	2021-03-23	fpsyg-12-644652	Completed	14:20:47	Gowrishankar S	Sumithra P	4	Santhosh Kumar L	2021-03-23 14:35:41	2021-03-23 15:11:27																												23-Mar-2021		23-Mar-2021
3	2021-03-23	fmed-08-661076	Completed	14:34:27	Manoj B	Janani M	3	Santhosh Kumar L	2021-03-23 15:32:06	2021-03-23 15:32:19	17:44:01	Sathya R	Janani M	3	Santhosh Kumar L	2021-03-23 17:53:16	2021-03-23 17:53:20	20:12:51	Sathya R	Janani M	1	Santhosh Kumar L	2021-03-23 20:33:35	2021-03-23 20:35:42														23-Mar-2021		23-Mar-2021
1	2021-03-23	fpsyg-12-650541	Completed	14:41:06	Priyadharshini S	Senthilkumar	2	Gowtham M	2021-03-23 16:06:58	2021-03-23 16:14:17																												23-Mar-2021		23-Mar-2021
1	2021-03-23	fpsyt-12-644114	Completed	15:06:27	Gowrishankar S	Gopala Krishnan R	4	Santhosh Kumar L	2021-03-23 15:11:36	2021-03-23 15:20:53																												23-Mar-2021		23-Mar-2021
1	2021-03-23	fmars-08-671064	Completed	15:41:37	Siva Sankar Narayanan M	SenthilKumar P	5	Santhosh Kumar L	2021-03-23 15:42:55	2021-03-23 15:48:06																												23-Mar-2021		23-Mar-2021
1	2021-03-23	fpsyt-12-626991	Completed	16:01:27	Priyadharshini S	Senthilkumar	10	Gowtham M	2021-03-23 16:14:59	2021-03-23 16:36:23																												23-Mar-2021		23-Mar-2021
1	2021-03-23	fpsyg-12-642347	Completed	16:01:44	Gowthami L	Senthilkumar	1	Gowtham M	2021-03-23 16:45:06	2021-03-23 16:48:25																												23-Mar-2021		23-Mar-2021
1	2021-03-23	fpsyt-12-653662	Completed	16:03:15	Gowrishankar S	Gopala Krishnan R	3	Santhosh Kumar L	2021-03-23 16:05:35	2021-03-23 16:16:53																												23-Mar-2021		23-Mar-2021
1	2021-03-23	fimmu-12-630380	Completed	16:17:05	Mahalingam K	Gopala Krishnan R	11	Gopala Krishnan R	2021-03-23 16:25:34	2021-03-23 16:25:39																												23-Mar-2021		23-Mar-2021
1	2021-03-23	fpsyt-12-582392	Completed	16:18:25	Gowthami L	Senthilkumar	1	Gowtham M	2021-03-23 16:48:38	2021-03-23 16:52:43																												23-Mar-2021		23-Mar-2021
1	2021-03-23	fspor-03-624475	Completed	16:28:06	Gowthami L	Senthilkumar	5	Gowtham M	2021-03-23 16:52:50	2021-03-23 17:07:52																												23-Mar-2021		23-Mar-2021
1	2021-03-23	fgene-12-649586	Completed	16:28:59	Siva Sankar Narayanan M	Muthu Kumar M	5	Santhosh Kumar L	2021-03-23 16:41:58	2021-03-23 16:43:45																												23-Mar-2021		23-Mar-2021
1	2021-03-23	fneur-12-655303	Completed	16:32:42	Mahalingam K	Janani M	7	Santhosh Kumar L	2021-03-23 16:43:58	2021-03-23 17:10:35																												23-Mar-2021		23-Mar-2021
1	2021-03-23	fpsyg-12-546476	Completed	16:34:42	Renganath K	Saravanavel Murugan P	10	Maheswari D	2021-03-24 06:54:17	2021-03-24 07:05:57																												23-Mar-2021		24-Mar-2021
1	2021-03-23	fphy-09-644815	Completed	16:35:40	Gowthami L	Senthilkumar	4	Gowtham M	2021-03-23 17:08:01	2021-03-23 17:18:28																												23-Mar-2021		23-Mar-2021
1	2021-03-23	fpls-12-643585	Completed	16:41:25	Ajith L	Kalaivani R	6	Santhosh Kumar L	2021-03-23 17:24:49	2021-03-23 17:31:16																												23-Mar-2021		23-Mar-2021
1	2021-03-23	fvets-08-616955	Completed	16:45:36	Gowrishankar S	Gopala Krishnan R	8	Santhosh Kumar L	2021-03-23 16:46:29	2021-03-23 16:52:11																												23-Mar-2021		23-Mar-2021
1	2021-03-23	fpsyg-12-639955	Completed	16:48:24	Gowthami L	Senthilkumar	1	Santhosh Kumar L	2021-03-23 17:45:20	2021-03-23 17:47:22																												23-Mar-2021		23-Mar-2021
2	2021-03-23	fcvm-08-631807	Completed	16:49:30	Ajith L	Kalaivani R	10	Santhosh Kumar L	2021-03-23 17:39:21	2021-03-23 17:42:56	18:11:39	Ajith L	SenthilKumar P	1	Santhosh Kumar L	2021-03-23 18:23:09	2021-03-23 18:24:52																					23-Mar-2021		23-Mar-2021
1	2021-03-23	fbioe-09-614325	Completed	16:59:44	Buvanenthiran P	Muthu Kumar M	3	Santhosh Kumar L	2021-03-23 17:10:42	2021-03-23 17:18:11																												23-Mar-2021		23-Mar-2021
1	2021-03-23	fpsyg-12-668717	Completed	17:11:32	Siva Sankar Narayanan M	Gopala Krishnan R	3	Santhosh Kumar L	2021-03-23 17:18:18	2021-03-23 17:23:57																												23-Mar-2021		23-Mar-2021
1	2021-03-23	fmed-08-606755	Completed	17:13:30	Ajith L	Kalaivani R	2	Santhosh Kumar L	2021-03-23 17:33:19	2021-03-23 17:37:20																												23-Mar-2021		23-Mar-2021
1	2021-03-23	fnbot-15-639999	Completed	17:14:03	Renganath K	Sumithra P	10	Maheswari D	2021-03-24 07:22:26	2021-03-24 07:31:44																												23-Mar-2021		24-Mar-2021
1	2021-03-23	fmed-08-656745	Completed	17:15:18	Priyadharshini S	Janani M	10	Gowtham M	2021-03-23 17:55:39	2021-03-23 18:14:20																												23-Mar-2021		23-Mar-2021
1	2021-03-23	fsurg-08-655755	Completed	17:24:49	Gowthami L	Gopala Krishnan R	4	Santhosh Kumar L	2021-03-23 17:48:26	2021-03-23 17:51:38																												23-Mar-2021		23-Mar-2021
1	2021-03-23	fmicb-12-670975	Completed	17:24:57	Priyadharshini S	Nathiya S	10	Gowtham M	2021-03-23 18:18:56	2021-03-23 18:27:53																												23-Mar-2021		23-Mar-2021
1	2021-03-23	fdgth-03-595704	Completed	17:29:05	Manoj B	Sridhar G	3	Maheswari D	2021-03-24 08:14:31	2021-03-24 08:22:53																												23-Mar-2021		24-Mar-2021
2	2021-03-23	fspor-03-607205	Completed	17:53:16	Ajith L	SenthilKumar P	1	Santhosh Kumar L	2021-03-23 17:55:32	2021-03-23 17:59:40	21:06:48	Ajith L	SenthilKumar P	2	Santhosh Kumar L	2021-03-23 21:18:09	2021-03-23 21:23:33																					23-Mar-2021		23-Mar-2021
1	2021-03-23	fnins-15-611962	Completed	17:56:11	Mahalingam K	Divya A	11	Santhosh Kumar L	2021-03-23 18:00:00	2021-03-23 18:15:02																												23-Mar-2021		23-Mar-2021
1	2021-03-23	fpubh-09-616191	Completed	17:59:22	Gowthami L	Gopala Krishnan R	3	Santhosh Kumar L	2021-03-23 18:25:55	2021-03-23 18:26:59																												23-Mar-2021		23-Mar-2021
1	2021-03-23	fpsyg-12-637776	Completed	18:01:55	Buvanenthiran P	Durga B	3	Santhosh Kumar L	2021-03-23 18:15:17	2021-03-23 18:16:56																												23-Mar-2021		23-Mar-2021
1	2021-03-23	fpsyt-12-585537	Completed	18:11:32	Priyadharshini S	Sridhar G	10	Gowtham M	2021-03-23 18:27:59	2021-03-23 18:33:01																												23-Mar-2021		23-Mar-2021
1	2021-03-23	fpls-12-650215	Completed	18:13:24	Siva Sankar Narayanan M	Saravanavel Murugan P	5	Santhosh Kumar L	2021-03-23 18:17:06	2021-03-23 18:22:31																												23-Mar-2021		23-Mar-2021
1	2021-03-23	fneur-12-638853	Completed	18:14:37	Renganath K	Janani M	10	Maheswari D	2021-03-24 08:23:14	2021-03-24 08:30:51																												23-Mar-2021		24-Mar-2021
1	2021-03-23	fneur-12-646613	Completed	18:16:21	Sathya R	Saravanavel Murugan P	5	Gowtham M	2021-03-23 20:45:46	2021-03-23 20:52:08																												23-Mar-2021		23-Mar-2021
1	2021-03-23	fpsyt-12-599905	Completed	18:31:46	Priyadharshini S	Janani M	10	Gowtham M	2021-03-23 20:24:32	2021-03-23 20:34:15																												23-Mar-2021		23-Mar-2021
1	2021-03-23	fpsyt-12-633523	Completed	18:31:58	Gowthami L	Divya A	5	Gowtham M	2021-03-23 18:33:13	2021-03-23 18:46:39																												23-Mar-2021		23-Mar-2021
1	2021-03-23	fped-09-648972	Completed	18:48:36	Mahalingam K	Saravanavel Murugan P	7	Santhosh Kumar L	2021-03-23 19:09:57	2021-03-23 19:12:25																												23-Mar-2021		23-Mar-2021
1	2021-03-23	fneur-12-626608	Completed	18:50:36	Ajith L	Janani M	2	Gowtham M	2021-03-23 21:18:45	2021-03-23 21:31:05																												23-Mar-2021		23-Mar-2021
1	2021-03-23	fsurg-08-657901	Completed	18:59:21	Siva Sankar Narayanan M	Senthilkumar	5	Santhosh Kumar L	2021-03-23 19:01:30	2021-03-23 19:09:45																												23-Mar-2021		23-Mar-2021
1	2021-03-23	fonc-11-625253	Completed	19:04:14	Ajith L	SenthilKumar P	7	Gowtham M	2021-03-23 21:31:12	2021-03-23 21:38:42																												23-Mar-2021		23-Mar-2021
1	2021-03-23	fphys-12-654053	Completed	19:05:58	Gowthami L	Saravanavel Murugan P	4	Gowtham M	2021-03-23 19:15:46	2021-03-23 19:39:01																												23-Mar-2021		23-Mar-2021
1	2021-03-23	fcvm-08-658400	Completed	19:07:21	Buvanenthiran P	Durga B	2	Santhosh Kumar L	2021-03-23 19:12:35	2021-03-23 19:14:51																												23-Mar-2021		23-Mar-2021
1	2021-03-23	fped-09-609389	Completed	19:14:51	Sathya R	Sridhar G	3	Gowtham M	2021-03-23 20:52:15	2021-03-23 20:57:34																												23-Mar-2021		23-Mar-2021
1	2021-03-23	fncel-15-617036	Completed	19:26:49	Mahalingam K	Durga B	11	Santhosh Kumar L	2021-03-23 19:29:08	2021-03-23 19:36:47																												23-Mar-2021		23-Mar-2021
1	2021-03-23	fcvccm-08-630471	Completed	19:29:08	Thomas S	SenthilKumar P	2	Maheswari D	2021-03-24 07:06:36	2021-03-24 07:21:56																												23-Mar-2021		24-Mar-2021
1	2021-03-23	fimmu-12-636118	Completed	19:38:50	Siva Sankar Narayanan M	SenthilKumar P	5	Santhosh Kumar L	2021-03-23 19:42:08	2021-03-23 19:45:56																												23-Mar-2021		23-Mar-2021
1	2021-03-23	frsen-02-645794	Completed	19:40:37	Sathya R	Gopala Krishnan R	2	Gowtham M	2021-03-23 20:57:40	2021-03-23 21:03:25																												23-Mar-2021		23-Mar-2021
1	2021-03-23	fpls-12-650582	Completed	19:46:55	Ajith L	Nathiya S	1	Santhosh Kumar L	2021-03-23 21:16:26	2021-03-23 21:17:58																												23-Mar-2021		23-Mar-2021
1	2021-03-23	frsus-02-633199	Completed	19:48:08	Priyadharshini S	Gopala Krishnan R	5	Gowtham M	2021-03-23 20:34:42	2021-03-23 20:37:23																												23-Mar-2021		23-Mar-2021
1	2021-03-23	fmed-08-620444	Completed	19:53:34	Buvanenthiran P	Kalaivani R	2	Santhosh Kumar L	2021-03-23 19:54:22	2021-03-23 19:59:39																												23-Mar-2021		23-Mar-2021
1	2021-03-23	fneur-12-648081	Completed	20:16:15	Buvanenthiran P	Janani M	2	Santhosh Kumar L	2021-03-23 20:31:15	2021-03-23 20:32:57																												23-Mar-2021		23-Mar-2021
1	2021-03-23	fspas-08-631582	Completed	20:17:24	Thomas S	SenthilKumar P	5	Maheswari D	2021-03-24 07:07:48	2021-03-24 07:22:08																												23-Mar-2021		24-Mar-2021
1	2021-03-23	fpsyt-12-639936	Completed	20:21:27	Ajith L	Muthu Kumar M	4	Santhosh Kumar L	2021-03-23 20:37:09	2021-03-23 20:38:56																												23-Mar-2021		23-Mar-2021
1	2021-03-23	fpsyg-12-646181	Completed	20:31:34	Priyadharshini S	Divya A	8	Gowtham M	2021-03-23 20:37:28	2021-03-23 20:41:36																												23-Mar-2021		23-Mar-2021
1	2021-03-23	fpls-12-645038	Completed	20:36:50	Mahalingam K	Sumithra P	7	Santhosh Kumar L	2021-03-23 20:39:16	2021-03-23 20:49:08																												23-Mar-2021		23-Mar-2021
1	2021-03-23	fpls-12-649147	Completed	20:40:28	Ajith L	Punniyamoorthy K	1	Santhosh Kumar L	2021-03-23 20:51:05	2021-03-23 20:52:37																												23-Mar-2021		23-Mar-2021
1	2021-03-23	fmed-08-651961	Completed	20:50:13	Ajith L	Divya A	1	Santhosh Kumar L	2021-03-23 20:57:25	2021-03-23 20:59:07																												23-Mar-2021		23-Mar-2021
1	2021-03-23	fpsyt-12-635813	Completed	20:57:01	Priyadharshini S	Senthilkumar	10	Gowtham M	2021-03-23 21:13:37	2021-03-23 21:18:33																												23-Mar-2021		23-Mar-2021
1	2021-03-23	fnut-08-624305	Completed	20:58:49	Buvanenthiran P	Sridhar G	4	Santhosh Kumar L	2021-03-23 21:02:47	2021-03-23 21:12:07																												23-Mar-2021		23-Mar-2021
1	2021-03-23	fneur-12-637199	Completed	21:02:57	Ajith L	Janani M	1	Santhosh Kumar L	2021-03-23 21:13:07	2021-03-23 21:15:22																												23-Mar-2021		23-Mar-2021
1	2021-03-23	fonc-11-564960	Completed	21:23:09	Buvanenthiran P	Muthu Kumar M	2	Santhosh Kumar L	2021-03-23 21:23:46	2021-03-23 21:26:37																												23-Mar-2021		23-Mar-2021
1	2021-03-23	fpls-12-671060	Completed	21:47:57	Buvanenthiran P	Kalaivani R	2	Santhosh Kumar L	2021-03-23 21:48:36	2021-03-23 21:51:52																												23-Mar-2021		23-Mar-2021
1	2021-03-24	fpsyg-12-667479	Completed	06:46:13	Thomas S	Muthu Kumar M	3	Divya V	2021-03-24 07:13:19	2021-03-24 07:20:27																												24-Mar-2021		24-Mar-2021
1	2021-03-24	frwa-03-670950	Completed	06:58:57	Sathya R	Gopala Krishnan R	3	Maheswari D	2021-03-24 07:09:37	2021-03-24 07:21:44																												24-Mar-2021		24-Mar-2021
1	2021-03-24	fpsyg-12-632948	Completed	07:07:17	Ajith L	SenthilKumar P	1	Divya V	2021-03-24 09:39:38	2021-03-24 09:40:44																												24-Mar-2021		24-Mar-2021
1	2021-03-24	feduc-06-635278	Completed	07:19:24	Ajith L	SenthilKumar P	5	Divya V	2021-03-24 09:41:17	2021-03-24 09:41:23																												24-Mar-2021		24-Mar-2021
1	2021-03-24	fmed-08-656926	Completed	07:25:44	Uma Y	SenthilKumar P	6	Maheswari D	2021-03-24 08:31:05	2021-03-24 08:50:43																												24-Mar-2021		24-Mar-2021
2	2021-03-24	fpubh-09-557431	Completed	07:25:57	Thomas S	Sumithra P	5	Maheswari D	2021-03-24 08:50:51	2021-03-24 08:55:20	09:32:16	Thomas S	Sumithra P	2	Maheswari D	2021-03-24 10:43:18	2021-03-24 10:54:04																					24-Mar-2021		24-Mar-2021
1	2021-03-24	fspor-03-662203	Completed	07:28:10	Sathya R	Senthilkumar	5	Maheswari D	2021-03-24 09:07:36	2021-03-24 09:14:28																												24-Mar-2021		24-Mar-2021
1	2021-03-24	fmars-08-673141	Completed	07:33:05	Muthulakshmi R	Kalaivani R	5	Divya V	2021-03-24 09:43:30	2021-03-24 09:48:47																												24-Mar-2021		24-Mar-2021
1	2021-03-24	fpsyg-12-645926	Completed	07:37:32	Ajith L	SenthilKumar P	5	Divya V	2021-03-24 09:41:50	2021-03-24 09:41:58																												24-Mar-2021		24-Mar-2021
1	2021-03-24	fmed-08-651961	Completed	07:43:37	Ajith L	SenthilKumar P	1	Divya V	2021-03-24 09:42:08	2021-03-24 09:42:59																												24-Mar-2021		24-Mar-2021
1	2021-03-24	fnins-15-648354	Completed	08:15:53	Uma Y	SenthilKumar P	2	Maheswari D	2021-03-24 08:55:37	2021-03-24 09:04:16																												24-Mar-2021		24-Mar-2021
1	2021-03-24	frwa-03-640544	Completed	08:25:24	Thomas S	Nathiya S	5	Maheswari D	2021-03-24 09:04:33	2021-03-24 13:06:34																												24-Mar-2021		24-Mar-2021
1	2021-03-24	fdgth-03-595704	Completed	08:30:56	Sathya R	Sridhar G	3	Maheswari D	2021-03-24 10:54:27	2021-03-24 10:56:42																												24-Mar-2021		24-Mar-2021
1	2021-03-24	fceng-03-631397	Completed	08:37:55	Muthulakshmi R	Kalaivani R	7	Divya V	2021-03-24 09:48:55	2021-03-24 10:20:42																												24-Mar-2021		24-Mar-2021
1	2021-03-24	fams-07-661388	Completed	08:55:52	Thomas S	Nathiya S	5	Maheswari D	2021-03-24 09:15:42	2021-03-24 10:33:14																												24-Mar-2021		24-Mar-2021
1	2021-03-24	fmed-08-598810	Completed	08:57:48	Sathya R	Kalaivani R	5	Maheswari D	2021-03-24 10:56:59	2021-03-24 11:24:27																												24-Mar-2021		24-Mar-2021
1	2021-03-24	fsoc-06-640384	Completed	09:06:26	Uma Y	SenthilKumar P	3	Maheswari D	2021-03-24 10:37:01	2021-03-24 10:42:47																												24-Mar-2021		24-Mar-2021
1	2021-03-24	fmed-08-626909	Completed	09:37:28	Sathya R	Kalaivani R	3	Maheswari D	2021-03-24 11:49:33	2021-03-24 11:52:35																												24-Mar-2021		24-Mar-2021
1	2021-03-24	fpsyg-12-599063	Completed	09:48:23	Ajith L	Kalaivani R	15	Divya V	2021-03-24 10:22:24	2021-03-24 11:01:29																												24-Mar-2021		24-Mar-2021
1	2021-03-24	fmed-08-650581	Completed	09:52:29	Uma Y	SenthilKumar P	5	Maheswari D	2021-03-24 11:24:37	2021-03-24 11:40:34																												24-Mar-2021		24-Mar-2021
1	2021-03-24	fonc-11-637431	Completed	10:00:05	Prakash A	SenthilKumar P	5	Divya V	2021-03-24 10:12:45	2021-03-24 10:32:22																												24-Mar-2021		24-Mar-2021
1	2021-03-24	frph-03-661360	Completed	10:15:53	Uma Y	SenthilKumar P	2	Maheswari D	2021-03-24 11:52:55	2021-03-24 12:12:28																												24-Mar-2021		24-Mar-2021
1	2021-03-24	fmed-08-631048	Completed	10:36:51	Sathya R	Kalaivani R	5	Divya V	2021-03-24 11:43:41	2021-03-24 11:51:33																												24-Mar-2021		24-Mar-2021
1	2021-03-24	fneur-12-654890	Completed	10:42:16	Sathya R	Aswini M	5	Divya V	2021-03-24 11:24:44	2021-03-24 11:40:11																												24-Mar-2021		24-Mar-2021
1	2021-03-24	fpls-12-629903	Completed	10:56:03	Ajith L	Muthu Kumar M	6	Divya V	2021-03-24 11:01:57	2021-03-24 11:08:54																												24-Mar-2021		24-Mar-2021
1	2021-03-24	frai-04-618469	Completed	11:04:09	Renganath K	Nathiya S	10	Maheswari D	2021-03-24 12:12:40	2021-03-24 12:23:55																												24-Mar-2021		24-Mar-2021
1	2021-03-24	fcvm-08-616568	Completed	11:04:11	Prakash A	SenthilKumar P	6	Divya V	2021-03-24 11:05:36	2021-03-24 11:08:07																												24-Mar-2021		24-Mar-2021
1	2021-03-24	fpsyt-12-632519	Completed	11:21:55	Uma Y	SenthilKumar P	5	Maheswari D	2021-03-24 12:24:08	2021-03-24 12:40:23																												24-Mar-2021		24-Mar-2021
1	2021-03-24	fmed-08-645589	Completed	11:24:40	Muthulakshmi R	Kalaivani R	5	Divya V	2021-03-24 12:28:19	2021-03-24 12:30:46																												24-Mar-2021		24-Mar-2021
1	2021-03-24	fnbeh-15-646337	Completed	11:29:48	Manoj B	Divya A	4	Maheswari D	2021-03-24 15:21:19	2021-03-24 15:49:06																												24-Mar-2021		24-Mar-2021
1	2021-03-24	fgene-12-597635	Completed	11:35:02	Prakash A	Sumithra P	5	Divya V	2021-03-24 12:13:20	2021-03-24 12:28:05																												24-Mar-2021		24-Mar-2021
1	2021-03-24	fpsyg-12-619887	Completed	11:46:34	Prakash A	Sumithra P	2	Divya V	2021-03-24 12:23:52	2021-03-24 12:31:08																												24-Mar-2021		24-Mar-2021
1	2021-03-24	fvets-08-637271	Completed	12:11:18	Renganath K	Durga B	10	Maheswari D	2021-03-24 13:06:46	2021-03-24 13:15:30																												24-Mar-2021		24-Mar-2021
1	2021-03-24	fpsyg-12-647740	Completed	12:16:42	Ajith L	SenthilKumar P	7	Divya V	2021-03-24 12:56:58	2021-03-24 13:08:25																												24-Mar-2021		24-Mar-2021
1	2021-03-24	fpsyt-12-631518	Completed	12:19:30	Prakash A	Senthilkumar	4	Divya V	2021-03-24 13:18:16	2021-03-24 13:30:35																												24-Mar-2021		24-Mar-2021
1	2021-03-24	fncel-15-596953	Completed	12:21:30	Muthulakshmi R	Kalaivani R	5	Divya V	2021-03-24 12:32:10	2021-03-24 16:04:56																												24-Mar-2021		24-Mar-2021
1	2021-03-24	fpls-12-641924	Completed	12:36:39	Manoj B	Divya A	2	Santhosh Kumar L	2021-03-24 15:04:55	2021-03-24 15:10:37																												24-Mar-2021		24-Mar-2021
1	2021-03-24	fevo-09-588292	Completed	12:44:01	Prakash A	Durga B	4	Divya V	2021-03-24 13:28:29	2021-03-24 13:41:48																												24-Mar-2021		24-Mar-2021
1	2021-03-24	frobt-08-637301	Completed	12:49:54	Ajith L	SenthilKumar P	6	Divya V	2021-03-24 13:07:44	2021-03-24 13:21:03																												24-Mar-2021		24-Mar-2021
1	2021-03-24	fpsyg-12-653034	Completed	12:55:08	Renganath K	Divya A	10	Maheswari D	2021-03-24 13:15:45	2021-03-24 13:27:58																												24-Mar-2021		24-Mar-2021
1	2021-03-24	fmed-08-604894	Completed	13:05:04	Ajith L	Gopala Krishnan R	1	Divya V	2021-03-24 13:42:08	2021-03-24 14:21:47																												24-Mar-2021		24-Mar-2021
2	2021-03-24	fcell-09-651145	Completed	13:09:45	Thomas S	Senthilkumar	5	Maheswari D	2021-03-24 13:28:12	2021-03-24 13:42:25	15:46:22	Thomas S	Senthilkumar	0	Maheswari D	2021-03-24 15:47:05	2021-03-24 15:47:10																					24-Mar-2021		24-Mar-2021
1	2021-03-24	fpsyg-12-652702	Completed	13:10:10	Renganath K	SenthilKumar P	10	Maheswari D	2021-03-24 13:42:36	2021-03-24 13:44:37																												24-Mar-2021		24-Mar-2021
1	2021-03-24	fnut-08-617721	Completed	13:22:15	Ajith L	SenthilKumar P	1	Divya V	2021-03-24 13:57:35	2021-03-24 14:22:08																												24-Mar-2021		24-Mar-2021
1	2021-03-24	fonc-11-621422	Completed	13:39:45	Renganath K	Kalaivani R	10	Maheswari D	2021-03-24 14:01:50	2021-03-24 14:06:30																												24-Mar-2021		24-Mar-2021
1	2021-03-24	fimmu-12-638446	Completed	13:44:44	Muthulakshmi R	Kalaivani R	3	Divya V	2021-03-24 14:00:44	2021-03-24 15:12:12																												24-Mar-2021		24-Mar-2021
1	2021-03-24	fpls-12-642199	Completed	13:57:00	Thomas S	Senthilkumar	5	Maheswari D	2021-03-24 14:06:38	2021-03-24 14:12:08																												24-Mar-2021		24-Mar-2021
1	2021-03-24	fspor-03-618990	Completed	13:58:38	Ajith L	Senthilkumar	1	Maheswari D	2021-03-24 14:20:41	2021-03-24 14:22:33																												24-Mar-2021		24-Mar-2021
1	2021-03-24	fpsyt-12-632496	Completed	14:23:50	Dinesh Kumar M	Gopala Krishnan R	2	Maheswari D	2021-03-24 15:16:31	2021-03-24 15:20:46																												24-Mar-2021		24-Mar-2021
1	2021-03-24	fagro-03-648080	Completed	14:46:25	Dinesh Kumar M	Muthu Kumar M	2	Maheswari D	2021-03-24 15:49:46	2021-03-24 16:01:29																												24-Mar-2021		24-Mar-2021
1	2021-03-24	fcell-09-638548	Completed	14:51:27	Thomas S	Kalaivani R	5	Maheswari D	2021-03-24 15:14:00	2021-03-24 15:14:10																												24-Mar-2021		24-Mar-2021
1	2021-03-24	fneur-12-649849	Completed	15:08:49	Manoj B	Sridhar G	2	Santhosh Kumar L	2021-03-24 15:12:09	2021-03-24 15:40:12																												24-Mar-2021		24-Mar-2021
1	2021-03-24	fnagi-13-627919	Completed	15:46:26	Dinesh Kumar M	Gopala Krishnan R	2	Maheswari D	2021-03-24 16:06:24	2021-03-24 16:24:03																												24-Mar-2021		24-Mar-2021
1	2021-03-24	fvets-08-643220	Completed	16:06:28	Priyadharshini S	Gopala Krishnan R	10	Maheswari D	2021-03-24 16:24:14	2021-03-24 16:36:19																												24-Mar-2021		24-Mar-2021
1	2021-03-24	fmedt-03-662697	Completed	16:09:21	Manoj B	Janani M	2	Santhosh Kumar L	2021-03-24 16:20:10	2021-03-24 16:25:38																												24-Mar-2021		24-Mar-2021
2	2021-03-24	fphy-09-639010	Completed	16:17:29	Priyadharshini S	Nathiya S	10	Maheswari D	2021-03-24 16:53:44	2021-03-24 17:00:06	21:40:04	Priyadharshini S	Nathiya S	2	Divya V	2021-03-24 21:55:10	2021-03-24 22:02:56																					24-Mar-2021		24-Mar-2021
1	2021-03-24	fpubh-09-641882	Completed	16:31:32	Mahalingam K	Durga B	7	Santhosh Kumar L	2021-03-24 16:42:41	2021-03-24 16:46:29																												24-Mar-2021		24-Mar-2021
1	2021-03-24	fnano-03-644023	Completed	16:40:27	Dinesh Kumar M	Saravanavel Murugan P	2	Maheswari D	2021-03-24 17:00:17	2021-03-24 17:20:35																												24-Mar-2021		24-Mar-2021
1	2021-03-24	fgeed-03-618378	Completed	16:46:10	Buvanenthiran P	Senthilkumar	2	Santhosh Kumar L	2021-03-24 16:46:35	2021-03-24 17:05:53																												24-Mar-2021		24-Mar-2021
1	2021-03-24	fpos-03-627982	Completed	16:54:59	Priyadharshini S	Sumithra P	8	Maheswari D	2021-03-24 17:28:56	2021-03-24 17:41:32																												24-Mar-2021		24-Mar-2021
1	2021-03-24	fneur-12-598777	Completed	17:15:59	Manoj B	Janani K	3	Santhosh Kumar L	2021-03-24 17:24:59	2021-03-24 17:29:38																												24-Mar-2021		24-Mar-2021
1	2021-03-24	fpsyg-12-678894	Completed	17:19:34	Priyadharshini S	Gopala Krishnan R	10	Maheswari D	2021-03-24 17:20:47	2021-03-24 17:28:23																												24-Mar-2021		24-Mar-2021
1	2021-03-24	fpubh-09-652610	Completed	17:21:35	Mahalingam K	Janani M	7	Santhosh Kumar L	2021-03-24 17:29:50	2021-03-24 17:46:48																												24-Mar-2021		24-Mar-2021
1	2021-03-24	fneur-12-518133	Completed	17:28:30	Dinesh Kumar M	Gopala Krishnan R	2	Maheswari D	2021-03-24 17:54:37	2021-03-24 17:54:46																												24-Mar-2021		24-Mar-2021
1	2021-03-24	fnut-08-647782	Completed	17:33:31	Buvanenthiran P	Gopala Krishnan R	2	Santhosh Kumar L	2021-03-24 17:48:45	2021-03-24 17:49:43																												24-Mar-2021		24-Mar-2021
1	2021-03-24	fsoc-06-667576	Completed	17:41:46	Siva Sankar Narayanan M	Gopala Krishnan R	4	Santhosh Kumar L	2021-03-24 17:49:55	2021-03-24 18:01:34																												24-Mar-2021		24-Mar-2021
1	2021-03-24	feart-09-661337	Completed	17:59:31	Buvanenthiran P	Gopala Krishnan R	2	Santhosh Kumar L	2021-03-24 18:01:39	2021-03-24 18:04:45																												24-Mar-2021		24-Mar-2021
1	2021-03-24	frsc-03-648473	Completed	18:06:03	Dinesh Kumar M	Saravanavel Murugan P	2	Divya V	2021-03-24 18:33:15	2021-03-24 19:02:12																												24-Mar-2021		24-Mar-2021
1	2021-03-24	frobt-08-619390	Completed	18:21:15	Mahalingam K	Senthilkumar	7	Santhosh Kumar L	2021-03-24 18:22:03	2021-03-24 18:26:31																												24-Mar-2021		24-Mar-2021
1	2021-03-24	fncom-15-641335	Completed	18:25:08	Siva Sankar Narayanan M	Durga B	5	Santhosh Kumar L	2021-03-24 18:26:37	2021-03-24 18:34:32																												24-Mar-2021		24-Mar-2021
1	2021-03-24	fpsyt-12-650989	Completed	18:28:35	Dinesh Kumar M	SenthilKumar P	2	Divya V	2021-03-24 18:54:29	2021-03-24 18:56:35																												24-Mar-2021		24-Mar-2021
1	2021-03-24	fpsyt-12-601742	Completed	19:14:04	Siva Sankar Narayanan M	Divya A	5	Santhosh Kumar L	2021-03-24 19:16:08	2021-03-24 19:23:11																												24-Mar-2021		24-Mar-2021
1	2021-03-24	fenrg-09-675042	Completed	19:14:31	Mahalingam K	Muthu Kumar M	7	Santhosh Kumar L	2021-03-24 19:23:23	2021-03-24 19:25:15																												24-Mar-2021		24-Mar-2021
2	2021-03-24	fmed-08-636547	Completed	19:20:40	Priyadharshini S	Kalaivani R	10	Divya V	2021-03-24 19:23:00	2021-03-24 19:56:48	21:47:09	Priyadharshini S	Kalaivani R	2	Divya V	2021-03-24 21:59:46	2021-03-24 22:08:25																					24-Mar-2021		24-Mar-2021
1	2021-03-24	fpsyt-12-637789	Completed	19:33:21	Siva Sankar Narayanan M	Gopala Krishnan R	5	Santhosh Kumar L	2021-03-24 19:36:58	2021-03-24 19:38:32																												24-Mar-2021		24-Mar-2021
1	2021-03-24	fimmu-12-616713	Completed	19:44:20	Buvanenthiran P	Sridhar G	2	Santhosh Kumar L	2021-03-24 19:54:11	2021-03-24 19:56:26																												24-Mar-2021		24-Mar-2021
1	2021-03-24	fpsyt-12-656822	Completed	19:51:02	Siva Sankar Narayanan M	Aswini M	5	Santhosh Kumar L	2021-03-24 19:56:43	2021-03-24 20:02:59																												24-Mar-2021		24-Mar-2021
1	2021-03-24	fped-09-650326	Completed	20:05:58	Buvanenthiran P	Janani K	2	Santhosh Kumar L	2021-03-24 20:06:19	2021-03-24 20:09:34																												24-Mar-2021		24-Mar-2021
1	2021-03-24	fneur-12-647167	Completed	20:07:34	Mahalingam K	Kalaivani R	9	Santhosh Kumar L	2021-03-24 20:09:42	2021-03-24 20:11:35																												24-Mar-2021		24-Mar-2021
1	2021-03-24	fmed-08-651904	Completed	20:24:36	Priyadharshini S	Sumithra P	10	Divya V	2021-03-24 21:22:17	2021-03-24 21:37:50																												24-Mar-2021		24-Mar-2021
1	2021-03-24	fphy-09-606011	Completed	20:28:14	Buvanenthiran P	Aswini M	2	Santhosh Kumar L	2021-03-24 20:29:05	2021-03-24 20:36:44																												24-Mar-2021		24-Mar-2021
1	2021-03-24	fpsyg-12-600335	Completed	20:34:32	Siva Sankar Narayanan M	Janani M	5	Santhosh Kumar L	2021-03-24 20:36:57	2021-03-24 20:45:10																												24-Mar-2021		24-Mar-2021
1	2021-03-24	fnbot-15-650118	Completed	20:35:49	Dinesh Kumar M	Kalaivani R	2	Divya V	2021-03-24 20:48:05	2021-03-24 21:20:41																												24-Mar-2021		24-Mar-2021
1	2021-03-24	fpubh-09-671316	Completed	20:58:52	Siva Sankar Narayanan M	Kalaivani R	5	Santhosh Kumar L	2021-03-24 20:59:07	2021-03-24 21:10:47																												24-Mar-2021		24-Mar-2021
1	2021-03-24	fpsyt-12-634933	Completed	21:09:06	Buvanenthiran P	Durga B	2	Santhosh Kumar L	2021-03-24 21:10:52	2021-03-24 21:29:21																												24-Mar-2021		24-Mar-2021
1	2021-03-24	fped-09-584736	Completed	21:30:43	Priyadharshini S	Sridhar G	10	Divya V	2021-03-24 21:38:50	2021-03-24 21:54:14																												24-Mar-2021		24-Mar-2021
1	2021-03-24	fpubh-09-617521	Completed	21:30:45	Buvanenthiran P	Senthilkumar	2	Santhosh Kumar L	2021-03-24 21:31:33	2021-03-24 21:55:17																												24-Mar-2021		24-Mar-2021
1	2021-03-24	fnbeh-15-601698	Completed	21:33:12	Priyadharshini S	Muthu Kumar M	10	Divya V	2021-03-24 21:46:43	2021-03-24 21:59:28																												24-Mar-2021		24-Mar-2021
1	2021-03-25	fenrg-09-653542	Completed	06:53:46	Ajith L	Senthilkumar	1	Divya V	2021-03-25 08:06:42	2021-03-25 08:06:48																												25-Mar-2021		25-Mar-2021
1	2021-03-25	fgene-12-617935	Completed	07:33:47	Ajith L	SenthilKumar P	2	Divya V	2021-03-25 08:14:26	2021-03-25 08:31:05																												25-Mar-2021		25-Mar-2021
1	2021-03-25	fphy-09-652536	Completed	07:45:54	Dinesh Kumar M	Sumithra P	2	Divya V	2021-03-25 08:24:52	2021-03-25 08:37:51																												25-Mar-2021		25-Mar-2021
1	2021-03-25	fneur-12-648532	Completed	07:59:06	Uma Y	Aswini M	8	Maheswari D	2021-03-25 08:38:38	2021-03-25 09:07:11																												25-Mar-2021		25-Mar-2021
1	2021-03-25	fpls-12-646020	Completed	08:25:29	Prakash A	Gopala Krishnan R	7	Divya V	2021-03-25 08:33:54	2021-03-25 08:54:45																												25-Mar-2021		25-Mar-2021
2	2021-03-25	fpls-12-660620	Completed	08:39:23	Gowthami L	Saravanavel Murugan P	2	Maheswari D	2021-03-25 09:07:59	2021-03-25 09:11:59	10:11:46	Gowthami L	Saravanavel Murugan P	2	Maheswari D	2021-03-25 10:15:10	2021-03-25 10:22:30																					25-Mar-2021		25-Mar-2021
1	2021-03-25	fpsyg-12-636109	Completed	08:43:48	Dinesh Kumar M	Sumithra P	2	Divya V	2021-03-25 09:31:03	2021-03-25 10:02:58																												25-Mar-2021		25-Mar-2021
1	2021-03-25	fneur-12-638267	Completed	09:03:52	Ajith L	Nathiya S	15	Divya V	2021-03-25 09:44:15	2021-03-25 11:06:10																												25-Mar-2021		25-Mar-2021
1	2021-03-25	fvets-08-650143	Completed	09:05:14	Dinesh Kumar M	Sridhar G	2	Divya V	2021-03-25 09:37:53	2021-03-25 09:42:46																												25-Mar-2021		25-Mar-2021
1	2021-03-25	fneur-12-629414	Completed	09:21:11	Uma Y	Aswini M	15	Maheswari D	2021-03-25 09:23:36	2021-03-25 10:01:02																												25-Mar-2021		25-Mar-2021
1	2021-03-25	fpsyg-12-657671	Completed	09:22:03	Prakash A	Janani K	6	Divya V	2021-03-25 11:03:38	2021-03-25 11:19:45																												25-Mar-2021		25-Mar-2021
1	2021-03-25	fsurg-08-663364	Completed	09:26:10	Dinesh Kumar M	Janani K	2	Divya V	2021-03-25 09:41:21	2021-03-25 09:50:08																												25-Mar-2021		25-Mar-2021
1	2021-03-25	fpsyg-12-639955	Completed	09:31:02	Gowthami L	Saravanavel Murugan P	2	Maheswari D	2021-03-25 10:03:23	2021-03-25 10:35:40																												25-Mar-2021		25-Mar-2021
1	2021-03-25	fcvm-08-652852	Completed	09:38:00	Ajith L	Janani K	4	Divya V	2021-03-25 10:08:30	2021-03-25 10:25:29																												25-Mar-2021		25-Mar-2021
1	2021-03-25	fspor-03-659990	Completed	09:45:48	Dinesh Kumar M	Sridhar G	2	Divya V	2021-03-25 11:21:46	2021-03-25 11:33:44																												25-Mar-2021		25-Mar-2021
1	2021-03-25	fcvm-08-648349	Completed	10:27:32	Thomas S	Aswini M	5	Maheswari D	2021-03-25 10:35:16	2021-03-25 10:45:49																												25-Mar-2021		25-Mar-2021
1	2021-03-25	fsufs-05-651476	Completed	10:28:25	Prakash A	Divya A	6	Divya V	2021-03-25 11:12:05	2021-03-25 11:21:35																												25-Mar-2021		25-Mar-2021
1	2021-03-25	fphys-12-663677	Completed	10:29:16	Manoj B	Kalaivani R	2	Gowtham M	2021-03-25 14:11:44	2021-03-25 14:14:33																												25-Mar-2021		25-Mar-2021
1	2021-03-25	fmars-08-658384	Completed	10:33:59	Ajith L	Senthilkumar	7	Divya V	2021-03-25 12:00:14	2021-03-25 15:00:32																												25-Mar-2021		25-Mar-2021
1	2021-03-25	fpsyg-12-635148	Completed	10:34:21	Dinesh Kumar M	Janani M	2	Divya V	2021-03-25 11:30:58	2021-03-25 11:39:45																												25-Mar-2021		25-Mar-2021
1	2021-03-25	fsurg-08-626143	Completed	10:56:09	Prakash A	SenthilKumar P	2	Divya V	2021-03-25 11:19:55	2021-03-25 11:28:36																												25-Mar-2021		25-Mar-2021
1	2021-03-25	fbioe-09-674507	Completed	11:01:27	Uma Y	Sumithra P	1	Maheswari D	2021-03-25 11:10:28	2021-03-25 11:15:44																												25-Mar-2021		25-Mar-2021
1	2021-03-25	fpsyg-12-636859	Completed	11:01:51	Ajith L	Gopala Krishnan R	3	Divya V	2021-03-25 11:50:43	2021-03-25 12:05:48																												25-Mar-2021		25-Mar-2021
1	2021-03-25	fevo-09-670212	Completed	11:02:05	Priyadharshini S	Kalaivani R	2	Maheswari D	2021-03-25 11:05:43	2021-03-25 11:10:20																												25-Mar-2021		25-Mar-2021
1	2021-03-25	fnagi-13-631599	Completed	11:03:32	Renganath K	Nathiya S	10	Maheswari D	2021-03-25 11:15:58	2021-03-25 11:40:01																												25-Mar-2021		25-Mar-2021
1	2021-03-25	fcvm-08-670964	Completed	11:03:43	Thomas S	Janani K	5	Maheswari D	2021-03-25 11:40:27	2021-03-25 11:45:02																												25-Mar-2021		25-Mar-2021
1	2021-03-25	fsurg-08-652958	Completed	11:09:50	Prakash A	Kalaivani R	3	Divya V	2021-03-25 12:06:34	2021-03-25 12:16:48																												25-Mar-2021		25-Mar-2021
1	2021-03-25	fpsyg-12-644050	Completed	11:12:39	Dinesh Kumar M	Nathiya S	2	Divya V	2021-03-25 11:34:53	2021-03-25 11:45:13																												25-Mar-2021		25-Mar-2021
1	2021-03-25	fnins-15-651762	Completed	11:15:24	Thomas S	Divya A	5	Maheswari D	2021-03-25 11:51:07	2021-03-25 11:56:57																												25-Mar-2021		25-Mar-2021
1	2021-03-25	fonc-11-644994	Completed	11:22:30	Gowthami L	Nathiya S	4	Maheswari D	2021-03-25 11:57:13	2021-03-25 12:05:12																												25-Mar-2021		25-Mar-2021
1	2021-03-25	fvets-08-656391	Completed	11:32:01	Prakash A	Kalaivani R	4	Divya V	2021-03-25 12:25:17	2021-03-25 12:35:57																												25-Mar-2021		25-Mar-2021
1	2021-03-25	fsufs-05-642244	Completed	11:34:03	Ajith L	Senthilkumar	1	Divya V	2021-03-25 11:40:08	2021-03-25 11:50:33																												25-Mar-2021		25-Mar-2021
1	2021-03-25	fvets-08-639848	Completed	11:37:43	Renganath K	Sumithra P	10	Maheswari D	2021-03-25 12:05:20	2021-03-25 12:08:32																												25-Mar-2021		25-Mar-2021
1	2021-03-25	fbinf-01-638255	Completed	11:41:07	Manoj B	Janani K	2	Gowtham M	2021-03-25 14:14:51	2021-03-25 14:18:12																												25-Mar-2021		25-Mar-2021
1	2021-03-25	fevo-09-637954	Completed	11:47:06	Renganath K	Gopala Krishnan R	10	Maheswari D	2021-03-25 12:08:40	2021-03-25 12:18:44																												25-Mar-2021		25-Mar-2021
1	2021-03-25	fnut-08-600756	Completed	11:49:59	Thomas S	Senthilkumar	5	Maheswari D	2021-03-25 12:30:31	2021-03-25 12:34:18																												25-Mar-2021		25-Mar-2021
1	2021-03-25	fcvm-08-634774	Completed	11:54:48	Uma Y	Sumithra P	3	Maheswari D	2021-03-25 12:34:29	2021-03-25 12:40:47																												25-Mar-2021		25-Mar-2021
1	2021-03-25	fvets-08-651160	Completed	12:01:50	Renganath K	Divya A	10	Maheswari D	2021-03-25 12:40:56	2021-03-25 12:46:07																												25-Mar-2021		25-Mar-2021
1	2021-03-25	froh-02-635055	Completed	12:10:15	Renganath K	SenthilKumar P	10	Maheswari D	2021-03-25 12:46:17	2021-03-25 12:54:33																												25-Mar-2021		25-Mar-2021
1	2021-03-25	fpubh-09-651179	Completed	12:15:58	Renganath K	Janani M	10	Maheswari D	2021-03-25 12:54:46	2021-03-25 12:58:53																												25-Mar-2021		25-Mar-2021
1	2021-03-25	fvets-08-609348	Completed	12:16:42	Ajith L	Senthilkumar	8	Divya V	2021-03-25 12:23:36	2021-03-25 15:20:26																												25-Mar-2021		25-Mar-2021
1	2021-03-25	fpubh-09-632800	Completed	12:20:19	Dinesh Kumar M	Senthilkumar	2	Divya V	2021-03-25 12:34:39	2021-03-25 13:40:47																												25-Mar-2021		25-Mar-2021
1	2021-03-25	fchem-09-661723	Completed	12:21:40	Prakash A	Divya A	4	Divya V	2021-03-25 12:27:35	2021-03-25 12:38:01																												25-Mar-2021		25-Mar-2021
1	2021-03-25	fonc-11-647253	Completed	12:22:13	Thomas S	Senthilkumar	5	Maheswari D	2021-03-25 13:02:00	2021-03-25 13:04:38																												25-Mar-2021		25-Mar-2021
1	2021-03-25	fpsyt-12-602244	Completed	12:24:44	Renganath K	Sridhar G	10	Maheswari D	2021-03-25 13:05:10	2021-03-25 13:08:50																												25-Mar-2021		25-Mar-2021
2	2021-03-25	fpubh-09-561873	Completed	12:30:44	Gowthami L	Nathiya S	5	Maheswari D	2021-03-25 13:08:59	2021-03-25 13:24:42	14:37:37	Gowthami L	Nathiya S	1	Maheswari D	2021-03-25 14:40:49	2021-03-25 14:46:21																					25-Mar-2021		25-Mar-2021
1	2021-03-25	fped-09-590969	Completed	12:44:55	Gowthami L	Sumithra P	4	Maheswari D	2021-03-25 13:24:55	2021-03-25 13:37:12																												25-Mar-2021		25-Mar-2021
2	2021-03-25	fdmed-02-632055	Completed	12:55:50	Gowthami L	Janani K	4	Maheswari D	2021-03-25 13:37:39	2021-03-25 13:51:35	14:45:58	Gowthami L	Sumithra P	1	Maheswari D	2021-03-25 14:47:09	2021-03-25 14:48:07																					25-Mar-2021		25-Mar-2021
1	2021-03-25	fpsyg-12-611279	Completed	12:56:14	Thomas S	Senthilkumar	5	Maheswari D	2021-03-25 14:10:58	2021-03-25 14:14:23																												25-Mar-2021		25-Mar-2021
1	2021-03-25	fvets-08-656814	Completed	13:16:53	Uma Y	SenthilKumar P	1	Maheswari D	2021-03-25 13:51:46	2021-03-25 13:58:57																												25-Mar-2021		25-Mar-2021
1	2021-03-25	fvets-08-613203	Completed	13:27:17	Amshaveni N	Senthilkumar	5	Gowtham M	2021-03-25 14:27:35	2021-03-25 14:41:45																												25-Mar-2021		25-Mar-2021
3	2021-03-25	fchem-09-638832	Completed	13:30:29	Gowthami L	Janani M	6	Maheswari D	2021-03-25 14:25:42	2021-03-25 14:40:42	14:55:41	Gowthami L	Sumithra P	5	Gowtham M	2021-03-25 15:11:58	2021-03-25 15:22:48	16:02:15	Gowthami L	Gopala Krishnan R	1	Gowtham M	2021-03-25 16:18:54	2021-03-25 16:23:03														25-Mar-2021		25-Mar-2021
1	2021-03-25	frcmn-02-656786	Completed	13:30:39	Amshaveni N	Divya A	5	Divya V	2021-03-25 14:55:23	2021-03-25 15:06:53																												25-Mar-2021		25-Mar-2021
1	2021-03-25	fmed-08-605912	Completed	13:35:17	Uma Y	SenthilKumar P	5	Maheswari D	2021-03-25 13:59:11	2021-03-25 14:05:40																												25-Mar-2021		25-Mar-2021
1	2021-03-25	fmed-08-626580	Completed	13:46:42	Uma Y	SenthilKumar P	2	Maheswari D	2021-03-25 14:05:51	2021-03-25 14:10:17																												25-Mar-2021		25-Mar-2021
1	2021-03-25	fpsyg-12-569115	Completed	13:54:49	Thomas S	Janani M	5	Maheswari D	2021-03-25 14:17:46	2021-03-25 14:25:24																												25-Mar-2021		25-Mar-2021
1	2021-03-25	froh-02-666895	Completed	14:10:21	Gowthami L	Sumithra P	5	Gowtham M	2021-03-25 14:19:57	2021-03-25 14:24:27																												25-Mar-2021		25-Mar-2021
1	2021-03-25	fneur-12-634065	Completed	14:48:31	Siva Sankar Narayanan M	SenthilKumar P	5	Santhosh Kumar L	2021-03-25 15:02:40	2021-03-25 15:11:41																												25-Mar-2021		25-Mar-2021
1	2021-03-25	fpsyt-12-579566	Completed	14:59:32	Priyadharshini S	Gopala Krishnan R	2	Gowtham M	2021-03-25 15:03:04	2021-03-25 15:03:50																												25-Mar-2021		25-Mar-2021
1	2021-03-25	fbloc-04-661238	Completed	15:53:24	Siva Sankar Narayanan M	Muthu Kumar M	5	Santhosh Kumar L	2021-03-25 16:20:54	2021-03-25 16:25:57																												25-Mar-2021		25-Mar-2021
1	2021-03-25	fphys-12-636997	Completed	15:59:03	Gowthami L	Gopala Krishnan R	5	Gowtham M	2021-03-25 16:01:53	2021-03-25 16:18:42																												25-Mar-2021		25-Mar-2021
1	2021-03-25	fneur-12-612569	Completed	16:13:45	Mahalingam K	Durga B	7	Santhosh Kumar L	2021-03-25 16:26:27	2021-03-25 16:28:27																												25-Mar-2021		25-Mar-2021
1	2021-03-25	fimmu-12-642167	Completed	17:00:14	Priyadharshini S	Nathiya S	10	Gowtham M	2021-03-25 17:03:27	2021-03-25 17:23:24																												25-Mar-2021		25-Mar-2021
1	2021-03-25	fpsyg-12-623037	Completed	17:22:02	Buvanenthiran P	SenthilKumar P	2	Santhosh Kumar L	2021-03-25 17:23:54	2021-03-25 17:38:25																												25-Mar-2021		25-Mar-2021
1	2021-03-25	fncom-15-630271	Completed	17:58:09	Dinesh Kumar M	Sumithra P	2	Gowtham M	2021-03-25 17:59:37	2021-03-25 18:09:17																												25-Mar-2021		25-Mar-2021
1	2021-03-25	fcvm-08-655598	Completed	18:16:30	Siva Sankar Narayanan M	Saravanavel Murugan P	5	Santhosh Kumar L	2021-03-25 18:51:59	2021-03-25 18:55:42																												25-Mar-2021		25-Mar-2021
1	2021-03-25	fpsyt-12-644271	Completed	18:23:00	Dinesh Kumar M	Divya A	2	Gowtham M	2021-03-25 19:19:32	2021-03-25 19:25:57																												25-Mar-2021		25-Mar-2021
1	2021-03-25	fpsyt-12-626944	Completed	18:32:13	Siva Sankar Narayanan M	Punniyamoorthy K	3	Santhosh Kumar L	2021-03-25 18:55:55	2021-03-25 18:58:28																												25-Mar-2021		25-Mar-2021
1	2021-03-25	fneur-12-658266	Completed	18:34:34	Mahalingam K	Aswini M	9	Santhosh Kumar L	2021-03-25 18:58:37	2021-03-25 19:00:12																												25-Mar-2021		25-Mar-2021
1	2021-03-25	fpsyt-12-656560	Completed	18:34:38	Buvanenthiran P	Kalaivani R	4	Santhosh Kumar L	2021-03-25 19:00:21	2021-03-25 19:02:30																												25-Mar-2021		25-Mar-2021
1	2021-03-25	fsoc-06-568962	Completed	18:45:22	Dinesh Kumar M	Sumithra P	2	Gowtham M	2021-03-25 19:26:04	2021-03-25 19:39:33																												25-Mar-2021		25-Mar-2021
1	2021-03-25	fcvm-08-607104	Completed	18:45:47	Buvanenthiran P	Punniyamoorthy K	2	Santhosh Kumar L	2021-03-25 19:02:46	2021-03-25 19:03:58																												25-Mar-2021		25-Mar-2021
1	2021-03-25	feart-09-636156	Completed	18:55:41	Siva Sankar Narayanan M	Nathiya S	5	Santhosh Kumar L	2021-03-25 19:04:09	2021-03-25 19:27:44																												25-Mar-2021		25-Mar-2021
2	2021-03-25	fneur-12-632672	Completed	19:24:20	Gowrishankar S	Nathiya S	3	Santhosh Kumar L	2021-03-25 19:27:50	2021-03-25 19:33:03	20:43:48	Gowrishankar S	Nathiya S	3	Santhosh Kumar L	2021-03-25 20:45:19	2021-03-25 20:49:31																					25-Mar-2021		25-Mar-2021
1	2021-03-25	fmed-08-635706	Completed	19:24:58	Siva Sankar Narayanan M	Nathiya S	5	Santhosh Kumar L	2021-03-25 19:33:10	2021-03-25 19:41:24																												25-Mar-2021		25-Mar-2021
1	2021-03-25	fpls-12-639508	Completed	19:25:04	Mahalingam K	Sridhar G	7	Santhosh Kumar L	2021-03-25 19:41:32	2021-03-25 19:44:26																												25-Mar-2021		25-Mar-2021
1	2021-03-25	fpubh-09-662166	Completed	19:51:16	Gowrishankar S	Durga B	0	Santhosh Kumar L	2021-03-25 19:52:57	2021-03-25 19:57:12																												25-Mar-2021		25-Mar-2021
1	2021-03-25	fphy-09-656253	Completed	19:52:46	Siva Sankar Narayanan M	Divya A	5	Santhosh Kumar L	2021-03-25 19:59:15	2021-03-25 20:05:10																												25-Mar-2021		25-Mar-2021
1	2021-03-25	fvets-08-662370	Completed	19:54:00	Mahalingam K	Kalaivani R	3	Gowtham M	2021-03-25 19:56:53	2021-03-25 20:01:46																												25-Mar-2021		25-Mar-2021
1	2021-03-25	ffgc-04-673325	Completed	19:57:49	Buvanenthiran P	Gopala Krishnan R	2	Gowtham M	2021-03-25 20:02:19	2021-03-25 20:06:30																												25-Mar-2021		25-Mar-2021
1	2021-03-25	fpsyg-12-633771	Completed	20:02:41	Priyadharshini S	Janani M	10	Gowtham M	2021-03-25 20:06:44	2021-03-25 20:38:16																												25-Mar-2021		25-Mar-2021
1	2021-03-25	fphy-09-636001	Completed	20:17:14	Priyadharshini S	Punniyamoorthy K	10	Gowtham M	2021-03-25 20:42:11	2021-03-25 20:48:06																												25-Mar-2021		25-Mar-2021
1	2021-03-25	fgene-12-535340	Completed	20:27:16	Buvanenthiran P	Aswini M	3	Santhosh Kumar L	2021-03-25 20:27:45	2021-03-25 20:29:36																												25-Mar-2021		25-Mar-2021
1	2021-03-25	fpsyt-12-638359	Completed	20:28:07	Gowrishankar S	Sumithra P	1	Santhosh Kumar L	2021-03-25 20:29:44	2021-03-25 20:37:19																												25-Mar-2021		25-Mar-2021
1	2021-03-25	fonc-11-582676	Completed	20:30:10	Priyadharshini S	Sridhar G	2	Gowtham M	2021-03-25 20:48:12	2021-03-25 20:58:53																												25-Mar-2021		25-Mar-2021
1	2021-03-25	fneur-12-655746	Completed	20:48:57	Siva Sankar Narayanan M	Sridhar G	5	Santhosh Kumar L	2021-03-25 20:49:40	2021-03-25 20:52:36																												25-Mar-2021		25-Mar-2021
1	2021-03-25	fmed-08-625647	Completed	20:50:20	Mahalingam K	Sumithra P	7	Santhosh Kumar L	2021-03-25 20:52:43	2021-03-25 20:57:35																												25-Mar-2021		25-Mar-2021
1	2021-03-25	fphy-09-669736	Completed	20:51:12	Priyadharshini S	Aswini M	8	Gowtham M	2021-03-25 20:59:00	2021-03-25 21:04:33																												25-Mar-2021		25-Mar-2021
1	2021-03-25	fpsyg-12-647821	Completed	20:59:36	Siva Sankar Narayanan M	Sridhar G	5	Santhosh Kumar L	2021-03-25 21:00:37	2021-03-25 21:17:30																												25-Mar-2021		25-Mar-2021
1	2021-03-25	fmats-08-647229	Completed	21:16:13	Buvanenthiran P	Sumithra P	2	Santhosh Kumar L	2021-03-25 21:17:35	2021-03-25 21:18:37																												25-Mar-2021		25-Mar-2021
1	2021-03-25	fpsyg-12-659403	Completed	21:28:03	Buvanenthiran P	Sumithra P	2	Santhosh Kumar L	2021-03-25 21:28:33	2021-03-25 21:35:35																												25-Mar-2021		25-Mar-2021
1	2021-03-25	fimmu-12-634497	Completed	21:29:34	Priyadharshini S	Durga B	10	Gowtham M	2021-03-25 21:32:43	2021-03-25 22:16:54																												25-Mar-2021		25-Mar-2021
1	2021-03-25	fneur-12-598777	Completed	21:42:19	Gowrishankar S	Janani K	9	Santhosh Kumar L	2021-03-25 21:43:41	2021-03-25 21:50:02																												25-Mar-2021		25-Mar-2021
1	2021-03-25	fpsyt-12-622562	Completed	22:28:08	Gowrishankar S	Divya A	5	Santhosh Kumar L	2021-03-25 22:30:10	2021-03-25 22:35:18																												25-Mar-2021		25-Mar-2021
1	2021-03-25	fmedt-03-662697	Completed	22:33:13	Buvanenthiran P	Janani M	2	Santhosh Kumar L	2021-03-25 22:35:26	2021-03-25 22:36:56																												25-Mar-2021		25-Mar-2021
1	2021-03-25	fonc-11-605853	Completed	22:39:01	Mahalingam K	Nathiya S	3	Santhosh Kumar L	2021-03-25 22:49:32	2021-03-25 22:52:30																												25-Mar-2021		25-Mar-2021
1	2021-03-25	fimmu-12-639217	Completed	23:02:37	Siva Sankar Narayanan M	Janani M	5	Santhosh Kumar L	2021-03-25 23:03:19	2021-03-25 23:05:37																												25-Mar-2021		25-Mar-2021
1	2021-03-25	fped-09-597926	Completed	23:05:04	Mahalingam K	Saravanavel Murugan P	7	Santhosh Kumar L	2021-03-25 23:05:45	2021-03-25 23:08:18																												25-Mar-2021		25-Mar-2021
1	2021-03-25	fnbeh-15-646337	Completed	23:07:12	Buvanenthiran P	Divya A	3	Santhosh Kumar L	2021-03-25 23:08:43	2021-03-25 23:11:13																												25-Mar-2021		25-Mar-2021
1	2021-03-25	fpsyt-12-641912	Completed	23:14:32	Gowrishankar S	Divya A	5	Santhosh Kumar L	2021-03-25 23:15:53	2021-03-25 23:18:48																												25-Mar-2021		25-Mar-2021
1	2021-03-25	fneur-12-647338	Completed	23:21:54	Siva Sankar Narayanan M	SenthilKumar P	5	Santhosh Kumar L	2021-03-25 23:22:24	2021-03-25 23:30:15																												25-Mar-2021		25-Mar-2021
1	2021-03-25	fped-09-646517	Completed	23:36:37	Mahalingam K	SenthilKumar P	7	Santhosh Kumar L	2021-03-25 23:42:47	2021-03-25 23:44:54																												25-Mar-2021		25-Mar-2021
1	2021-03-25	fmolb-08-645845	Completed	23:52:19	Siva Sankar Narayanan M	Saravanavel Murugan P	5	Santhosh Kumar L	2021-03-25 23:53:02	2021-03-25 23:57:10																												25-Mar-2021		25-Mar-2021
1	2021-03-25	fneur-12-649849	Completed	23:53:51	Buvanenthiran P	Sridhar G	2	Santhosh Kumar L	2021-03-25 23:59:24	2021-03-26 00:01:38																												25-Mar-2021		25-Mar-2021
1	2021-03-26	frai-04-644712	Completed	00:01:45	Gowrishankar S	SenthilKumar P	3	Santhosh Kumar L	2021-03-26 00:04:32	2021-03-26 00:09:39																												26-Mar-2021		26-Mar-2021
1	2021-03-26	fphys-12-663677	Completed	00:05:38	Buvanenthiran P	Kalaivani R	2	Santhosh Kumar L	2021-03-26 00:09:47	2021-03-26 00:11:12																												26-Mar-2021		26-Mar-2021
1	2021-03-26	fevo-09-619682	Completed	00:21:30	Gowrishankar S	SenthilKumar P	2	Santhosh Kumar L	2021-03-26 00:24:40	2021-03-26 00:25:54																												26-Mar-2021		26-Mar-2021
1	2021-03-26	fped-09-651297	Completed	00:22:13	Mahalingam K	Sridhar G	7	Santhosh Kumar L	2021-03-26 00:26:07	2021-03-26 00:28:07																												26-Mar-2021		26-Mar-2021
1	2021-03-26	fpsyg-12-662646	Completed	06:58:51	Uma Y	SenthilKumar P	2	Maheswari D	2021-03-26 07:52:40	2021-03-26 07:52:46																												26-Mar-2021		26-Mar-2021
1	2021-03-26	fmolb-07-585245	Completed	07:45:45	Renganath K	Gopala Krishnan R	10	Maheswari D	2021-03-26 07:56:47	2021-03-26 08:02:41																												26-Mar-2021		26-Mar-2021
1	2021-03-26	fbloc-04-506436	Completed	07:51:22	Uma Y	SenthilKumar P	10	Maheswari D	2021-03-26 08:02:49	2021-03-26 08:21:54																												26-Mar-2021		26-Mar-2021
1	2021-03-26	fneur-12-646015	Completed	07:52:47	Muthulakshmi R	SenthilKumar P	8	Divya V	2021-03-26 08:39:56	2021-03-26 09:47:21																												26-Mar-2021		26-Mar-2021
1	2021-03-26	fpsyg-12-635447	Completed	07:57:54	Prakash A	Aswini M	6	Divya V	2021-03-26 08:27:24	2021-03-26 08:41:15																												26-Mar-2021		26-Mar-2021
1	2021-03-26	fpls-12-641924	Completed	08:13:26	Thomas S	Divya A	3	Maheswari D	2021-03-26 08:22:06	2021-03-26 08:34:38																												26-Mar-2021		26-Mar-2021
1	2021-03-26	fneur-12-660909	Completed	08:28:53	Uma Y	SenthilKumar P	8	Maheswari D	2021-03-26 08:34:46	2021-03-26 08:59:11																												26-Mar-2021		26-Mar-2021
1	2021-03-26	fbinf-01-638255	Completed	08:36:15	Prakash A	Janani K	4	Divya V	2021-03-26 09:47:34	2021-03-26 10:06:16																												26-Mar-2021		26-Mar-2021
1	2021-03-26	fncel-15-631485	Completed	09:00:49	Thomas S	Kalaivani R	5	Maheswari D	2021-03-26 09:05:20	2021-03-26 11:18:02																												26-Mar-2021		26-Mar-2021
1	2021-03-26	fneur-12-645822	Completed	09:02:56	Prakash A	Janani M	4	Divya V	2021-03-26 09:57:27	2021-03-26 10:10:45																												26-Mar-2021		26-Mar-2021
1	2021-03-26	fneur-12-620757	Completed	09:08:42	Muthulakshmi R	SenthilKumar P	10	Divya V	2021-03-26 10:23:52	2021-03-26 11:39:13																												26-Mar-2021		26-Mar-2021
1	2021-03-26	fphy-09-651147	Completed	09:32:23	Thomas S	Sridhar G	5	Maheswari D	2021-03-26 10:48:23	2021-03-26 11:17:35																												26-Mar-2021		26-Mar-2021
1	2021-03-26	fnhum-15-625888	Completed	09:42:33	Renganath K	Sridhar G	10	Maheswari D	2021-03-26 11:18:31	2021-03-26 11:32:13																												26-Mar-2021		26-Mar-2021
1	2021-03-26	fpsyg-12-651398	Completed	10:21:08	Renganath K	Divya A	10	Maheswari D	2021-03-26 11:32:22	2021-03-26 11:37:23																												26-Mar-2021		26-Mar-2021
1	2021-03-26	fneur-12-613441	Completed	10:30:49	Muthulakshmi R	SenthilKumar P	5	Divya V	2021-03-26 11:20:34	2021-03-26 11:39:29																												26-Mar-2021		26-Mar-2021
1	2021-03-26	fpls-12-644881	Completed	10:33:08	Priyadharshini S	Durga B	2	Maheswari D	2021-03-26 11:37:32	2021-03-26 11:55:30																												26-Mar-2021		26-Mar-2021
1	2021-03-26	feart-09-626720	Completed	10:55:53	Priyadharshini S	Durga B	2	Maheswari D	2021-03-26 14:14:23	2021-03-26 14:19:05																												26-Mar-2021		26-Mar-2021
1	2021-03-26	fneur-12-652177	Completed	10:59:19	Prakash A	Janani M	6	Divya V	2021-03-26 12:03:07	2021-03-26 12:51:57																												26-Mar-2021		26-Mar-2021
1	2021-03-26	fpubh-09-587459	Completed	11:22:58	Renganath K	Nathiya S	10	Maheswari D	2021-03-26 11:55:38	2021-03-26 12:23:46																												26-Mar-2021		26-Mar-2021
1	2021-03-26	fnagi-13-617611	Completed	11:28:12	Muthulakshmi R	SenthilKumar P	8	Divya V	2021-03-26 13:12:03	2021-03-26 13:42:53																												26-Mar-2021		26-Mar-2021
1	2021-03-26	fmed-08-621861	Completed	11:36:16	Prakash A	Divya A	4	Divya V	2021-03-26 12:48:41	2021-03-26 13:00:33																												26-Mar-2021		26-Mar-2021
1	2021-03-26	fnbeh-15-639372	Completed	11:51:37	Renganath K	Senthilkumar	10	Maheswari D	2021-03-26 12:24:08	2021-03-26 12:58:28																												26-Mar-2021		26-Mar-2021
1	2021-03-26	fcvm-08-574360	Completed	11:59:30	Priyadharshini S	Aswini M	10	Gowtham M	2021-03-26 14:16:55	2021-03-26 14:37:58																												26-Mar-2021		26-Mar-2021
1	2021-03-26	fped-09-624524	Completed	12:02:33	Uma Y	SenthilKumar P	8	Maheswari D	2021-03-26 13:00:02	2021-03-26 13:21:59																												26-Mar-2021		26-Mar-2021
1	2021-03-26	fpsyg-12-660080	Completed	12:30:49	Prakash A	Senthilkumar	5	Divya V	2021-03-26 12:54:16	2021-03-26 13:09:01																												26-Mar-2021		26-Mar-2021
1	2021-03-26	fphys-12-655971	Completed	12:43:38	Thomas S	Nathiya S	5	Maheswari D	2021-03-26 13:22:08	2021-03-26 13:26:40																												26-Mar-2021		26-Mar-2021
1	2021-03-26	fpsyt-12-665721	Completed	12:48:40	Prakash A	Senthilkumar	4	Divya V	2021-03-26 13:00:49	2021-03-26 13:11:39																												26-Mar-2021		26-Mar-2021
1	2021-03-26	fpsyg-12-643653	Completed	12:50:36	Renganath K	Janani M	10	Maheswari D	2021-03-26 13:27:31	2021-03-26 13:44:24																												26-Mar-2021		26-Mar-2021
1	2021-03-26	fimmu-12-625181	Completed	12:58:36	Prakash A	Durga B	1	Divya V	2021-03-26 13:34:40	2021-03-26 13:48:46																												26-Mar-2021		26-Mar-2021
1	2021-03-26	fpsyg-12-554100	Completed	13:07:40	Priyadharshini S	Durga B	10	Divya V	2021-03-26 14:23:04	2021-03-26 14:43:47																												26-Mar-2021		26-Mar-2021
1	2021-03-26	fneur-12-661740	Completed	13:09:21	Uma Y	SenthilKumar P	5	Maheswari D	2021-03-26 13:44:32	2021-03-26 13:52:42																												26-Mar-2021		26-Mar-2021
1	2021-03-26	fpsyg-12-597534	Completed	13:12:18	Muthulakshmi R	SenthilKumar P	20	Divya V	2021-03-26 13:43:14	2021-03-26 14:28:19																												26-Mar-2021		26-Mar-2021
1	2021-03-26	fnut-08-649640	Completed	13:17:51	Thomas S	Divya A	5	Maheswari D	2021-03-26 13:54:16	2021-03-26 14:09:30																												26-Mar-2021		26-Mar-2021
1	2021-03-26	fvets-08-660177	Completed	13:55:51	Priyadharshini S	Durga B	5	Santhosh Kumar L	2021-03-26 14:25:53	2021-03-26 14:28:10																												26-Mar-2021		26-Mar-2021
1	2021-03-26	fonc-11-647236	Completed	14:38:33	Thomas S	Senthilkumar	5	Gowtham M	2021-03-26 14:40:07	2021-03-26 14:48:15																												26-Mar-2021		26-Mar-2021
1	2021-03-26	fphy-09-620331	Completed	15:33:13	Muthulakshmi R	Kalaivani R	5	Gowtham M	2021-03-26 15:36:03	2021-03-26 15:47:15																												26-Mar-2021		26-Mar-2021
1	2021-03-26	fpsyg-12-647065	Completed	15:57:09	Mahalingam K	Kalaivani R	7	Santhosh Kumar L	2021-03-26 16:15:26	2021-03-26 16:47:51																												26-Mar-2021		26-Mar-2021
1	2021-03-26	fphy-09-637964	Completed	16:09:45	Muthulakshmi R	Kalaivani R	4	Gowtham M	2021-03-26 16:22:20	2021-03-26 16:31:25																												26-Mar-2021		26-Mar-2021
1	2021-03-26	fvets-08-641818	Completed	16:25:59	Gowrishankar S	Punniyamoorthy K	6	Santhosh Kumar L	2021-03-26 16:48:06	2021-03-26 16:56:51																												26-Mar-2021		26-Mar-2021
1	2021-03-26	fnbot-15-665055	Completed	16:38:03	Priyadharshini S	Gopala Krishnan R	10	Gowtham M	2021-03-26 16:46:33	2021-03-26 17:15:20																												26-Mar-2021		26-Mar-2021
1	2021-03-26	fnbot-15-625479	Completed	16:39:41	Mahalingam K	Nathiya S	7	Santhosh Kumar L	2021-03-26 16:57:52	2021-03-26 17:08:33																												26-Mar-2021		26-Mar-2021
1	2021-03-26	fpls-12-675690	Completed	17:04:26	Priyadharshini S	Gopala Krishnan R	5	Gowtham M	2021-03-26 17:58:53	2021-03-26 18:02:45																												26-Mar-2021		26-Mar-2021
1	2021-03-26	fpsyg-12-643670	Completed	17:08:04	Muthulakshmi R	Kalaivani R	5	Gowtham M	2021-03-26 17:15:33	2021-03-26 17:29:00																												26-Mar-2021		26-Mar-2021
1	2021-03-26	fphys-12-646666	Completed	17:40:39	Mahalingam K	Sumithra P	11	Santhosh Kumar L	2021-03-26 17:42:22	2021-03-26 17:57:58																												26-Mar-2021		26-Mar-2021
1	2021-03-26	fpsyg-12-647682	Completed	17:51:10	Priyadharshini S	Janani K	10	Gowtham M	2021-03-26 18:02:50	2021-03-26 18:39:28																												26-Mar-2021		26-Mar-2021
1	2021-03-26	fped-09-663228	Completed	17:57:10	Mahalingam K	Sridhar G	7	Santhosh Kumar L	2021-03-26 17:58:40	2021-03-26 18:02:17																												26-Mar-2021		26-Mar-2021
1	2021-03-26	fmed-08-585578	Completed	18:00:01	Gowrishankar S	Janani K	5	Santhosh Kumar L	2021-03-26 18:02:29	2021-03-26 18:21:59																												26-Mar-2021		26-Mar-2021
1	2021-03-26	fimmu-12-642860	Completed	18:37:35	Renganath K	SenthilKumar P	15	Gowtham M	2021-03-26 18:39:45	2021-03-26 18:55:07																												26-Mar-2021		26-Mar-2021
1	2021-03-26	fpsyt-12-596821	Completed	18:43:48	Priyadharshini S	Sumithra P	20	Gowtham M	2021-03-26 19:37:17	2021-03-26 20:46:01																												26-Mar-2021		26-Mar-2021
1	2021-03-26	fped-09-636638	Completed	18:52:30	Gowrishankar S	Divya A	5	Santhosh Kumar L	2021-03-26 18:57:45	2021-03-26 19:15:33																												26-Mar-2021		26-Mar-2021
1	2021-03-26	fpsyt-12-661488	Completed	19:05:34	Mahalingam K	Saravanavel Murugan P	3	Santhosh Kumar L	2021-03-26 19:15:38	2021-03-26 19:27:52																												26-Mar-2021		26-Mar-2021
1	2021-03-26	fimmu-12-594270	Completed	19:19:28	Buvanenthiran P	Gopala Krishnan R	2	Santhosh Kumar L	2021-03-26 19:27:59	2021-03-26 19:29:00																												26-Mar-2021		26-Mar-2021
1	2021-03-26	fpubh-09-676498	Completed	19:21:19	Mahalingam K	Aswini M	2	Santhosh Kumar L	2021-03-26 19:29:17	2021-03-26 19:30:48																												26-Mar-2021		26-Mar-2021
1	2021-03-26	fnagi-13-654509	Completed	19:26:38	Priyadharshini S	Aswini M	10	Gowtham M	2021-03-26 19:48:23	2021-03-26 20:11:21																												26-Mar-2021		26-Mar-2021
1	2021-03-26	fpsyt-12-623499	Completed	19:26:58	Gowrishankar S	Janani K	5	Santhosh Kumar L	2021-03-26 19:31:03	2021-03-26 19:42:11																												26-Mar-2021		26-Mar-2021
1	2021-03-26	fpsyt-12-651871	Completed	19:58:53	Gowrishankar S	Nathiya S	5	Santhosh Kumar L	2021-03-26 20:03:49	2021-03-26 20:20:11																												26-Mar-2021		26-Mar-2021
1	2021-03-26	fnano-03-660563	Completed	20:18:10	Buvanenthiran P	Janani K	2	Santhosh Kumar L	2021-03-26 20:20:24	2021-03-26 20:31:57																												26-Mar-2021		26-Mar-2021
1	2021-03-26	fpsyg-12-608413	Completed	20:23:52	Priyadharshini S	Aswini M	10	Gowtham M	2021-03-26 20:47:27	2021-03-26 21:41:11																												26-Mar-2021		26-Mar-2021
1	2021-03-26	fped-09-629824	Completed	20:28:21	Mahalingam K	Sridhar G	7	Santhosh Kumar L	2021-03-26 20:32:05	2021-03-26 20:39:09																												26-Mar-2021		26-Mar-2021
1	2021-03-26	fpsyt-12-634332	Completed	20:34:59	Buvanenthiran P	Kalaivani R	2	Santhosh Kumar L	2021-03-26 20:39:15	2021-03-26 20:40:14																												26-Mar-2021		26-Mar-2021
1	2021-03-26	fneur-12-648702	Completed	20:36:46	Gowrishankar S	Punniyamoorthy K	6	Santhosh Kumar L	2021-03-26 20:40:22	2021-03-26 20:52:56																												26-Mar-2021		26-Mar-2021
1	2021-03-26	frsus-02-654769	Completed	20:57:21	Priyadharshini S	Janani K	10	Gowtham M	2021-03-26 20:58:27	2021-03-26 21:20:59																												26-Mar-2021		26-Mar-2021
1	2021-03-26	fneur-12-643576	Completed	20:59:01	Gowrishankar S	Punniyamoorthy K	2	Santhosh Kumar L	2021-03-26 21:01:17	2021-03-26 21:19:42																												26-Mar-2021		26-Mar-2021
1	2021-03-26	fpubh-09-621433	Completed	21:10:34	Buvanenthiran P	Janani M	2	Santhosh Kumar L	2021-03-26 21:20:24	2021-03-26 21:21:54																												26-Mar-2021		26-Mar-2021
1	2021-03-26	fneur-12-673264	Completed	21:15:04	Priyadharshini S	Gopala Krishnan R	5	Gowtham M	2021-03-26 21:21:06	2021-03-26 21:28:06																												26-Mar-2021		26-Mar-2021
1	2021-03-26	fmicb-12-659907	Completed	21:33:20	Buvanenthiran P	Punniyamoorthy K	2	Santhosh Kumar L	2021-03-26 21:33:47	2021-03-26 21:42:22																												26-Mar-2021		26-Mar-2021
1	2021-03-26	frvir-02-647896	Completed	21:53:35	Buvanenthiran P	Punniyamoorthy K	2	Santhosh Kumar L	2021-03-26 21:54:34	2021-03-26 21:57:04																												26-Mar-2021		26-Mar-2021
1	2021-03-26	frsus-02-645843	Completed	22:30:27	Mahalingam K	Kalaivani R	7	Maheswari D	2021-03-27 07:00:21	2021-03-27 07:10:34																												26-Mar-2021		27-Mar-2021
1	2021-03-26	falgy-02-618713	Completed	23:24:55	Mahalingam K	Aswini M	7	Maheswari D	2021-03-27 08:35:02	2021-03-27 08:38:28																												26-Mar-2021		27-Mar-2021
1	2021-03-27	fceng-03-617701	Completed	00:12:50	Mahalingam K	Durga B	9	Maheswari D	2021-03-27 08:43:41	2021-03-27 08:58:50																												27-Mar-2021		27-Mar-2021
1	2021-03-27	fchem-09-665877	Completed	00:48:39	Mahalingam K	Saravanavel Murugan P	9	Maheswari D	2021-03-27 08:38:52	2021-03-27 08:43:18																												27-Mar-2021		27-Mar-2021
1	2021-03-27	fcvm-08-646832	Completed	01:35:35	Mahalingam K	Kalaivani R	9	Maheswari D	2021-03-27 08:59:21	2021-03-27 09:06:18																												27-Mar-2021		27-Mar-2021
1	2021-03-27	fcvm-08-658915	Completed	01:46:56	Mahalingam K	Divya A	7	Maheswari D	2021-03-27 09:06:58	2021-03-27 09:48:17																												27-Mar-2021		27-Mar-2021
1	2021-03-27	fmed-08-649326	Completed	01:54:31	Mahalingam K	Sridhar G	11	Maheswari D	2021-03-27 09:48:28	2021-03-27 10:57:34																												27-Mar-2021		27-Mar-2021
1	2021-03-27	fcvm-08-649181	Completed	01:59:13	Mahalingam K	SenthilKumar P	3	Maheswari D	2021-03-27 10:57:46	2021-03-27 11:05:16																												27-Mar-2021		27-Mar-2021
2	2021-03-27	fneur-12-627981	Completed	06:19:59	Ajith L	SenthilKumar P	15	Santhosh Kumar L	2021-03-27 11:31:21		17:16:15	Ajith L	SenthilKumar P	5	Santhosh Kumar L	2021-03-27 17:56:05	2021-03-27 17:56:10																					27-Mar-2021		27-Mar-2021
1	2021-03-27	fmed-08-604894	Completed	06:45:15	Ajith L	SenthilKumar P	1	Divya V	2021-03-27 07:56:48	2021-03-27 07:57:06																												27-Mar-2021		27-Mar-2021
1	2021-03-27	fpsyg-12-645967	Completed	07:04:09	Uma Y	Aswini M	4	Maheswari D	2021-03-27 07:44:18	2021-03-27 07:51:55																												27-Mar-2021		27-Mar-2021
1	2021-03-27	fnagi-13-650371	Completed	07:12:33	Ajith L	Sridhar G	1	Santhosh Kumar L	2021-03-27 11:05:29	2021-03-27 11:08:28																												27-Mar-2021		27-Mar-2021
1	2021-03-27	fpubh-09-577079	Completed	07:22:27	Uma Y	Aswini M	4	Maheswari D	2021-03-27 07:52:09	2021-03-27 08:01:38																												27-Mar-2021		27-Mar-2021
1	2021-03-27	fphys-12-656411	Completed	07:25:52	Ajith L	Kalaivani R	1	Divya V	2021-03-27 07:57:28	2021-03-27 08:38:46																												27-Mar-2021		27-Mar-2021
2	2021-03-27	fmed-08-635436	Completed	07:29:15	Muthulakshmi R	Muthu Kumar M	8	Gowtham M	2021-03-27 11:20:42	2021-03-27 11:32:27	13:42:22	Muthulakshmi R	Janani K	8	Gowtham M	2021-03-27 13:46:06	2021-03-27 13:56:11																					27-Mar-2021		27-Mar-2021
1	2021-03-27	fpsyg-12-592930	Completed	07:48:31	Ajith L	Saravanavel Murugan P	2	Divya V	2021-03-27 08:30:02	2021-03-27 10:10:21																												27-Mar-2021		27-Mar-2021
1	2021-03-27	fpubh-09-647230	Completed	07:54:23	Uma Y	Aswini M	3	Maheswari D	2021-03-27 08:01:51	2021-03-27 08:34:39																												27-Mar-2021		27-Mar-2021
1	2021-03-27	fpls-12-618524	Completed	07:58:54	Prakash A	SenthilKumar P	5	Santhosh Kumar L	2021-03-27 10:49:18	2021-03-27 10:52:54																												27-Mar-2021		27-Mar-2021
1	2021-03-27	frym-09-633011	Completed	08:04:17	Sathya R	Nathiya S	3	Vignesh V	2021-03-27 09:23:06	2021-03-27 10:16:38																												27-Mar-2021		27-Mar-2021
1	2021-03-27	fpsyt-12-636961	Completed	08:05:16	Ajith L	Janani M	7	Maheswari D	2021-03-27 09:55:16	2021-03-27 11:13:50																												27-Mar-2021		27-Mar-2021
1	2021-03-27	fsufs-05-664169	Completed	08:14:17	Sathya R	SenthilKumar P	3	Maheswari D	2021-03-27 09:51:22	2021-03-27 09:55:04																												27-Mar-2021		27-Mar-2021
1	2021-03-27	fmed-08-645651	Completed	08:23:00	Dinesh Kumar M	Punniyamoorthy K	2	Gowtham M	2021-03-27 10:39:02	2021-03-27 10:51:12																												27-Mar-2021		27-Mar-2021
1	2021-03-27	fpsyg-12-646047	Completed	08:26:03	Muthulakshmi R	Muthu Kumar M	5	Gowtham M	2021-03-27 11:32:33	2021-03-27 11:42:29																												27-Mar-2021		27-Mar-2021
2	2021-03-27	fpsyt-12-659568	Completed	08:36:12	Ajith L	Divya A	1	Santhosh Kumar L	2021-03-27 11:14:40	2021-03-27 11:15:26	12:19:31	Ajith L	Divya A	1	Santhosh Kumar L	2021-03-27 12:20:30	2021-03-27 12:25:42																					27-Mar-2021		27-Mar-2021
1	2021-03-27	fpsyt-12-592443	Completed	08:37:09	Dinesh Kumar M	Punniyamoorthy K	2	Gowtham M	2021-03-27 10:51:18	2021-03-27 10:57:51																												27-Mar-2021		27-Mar-2021
1	2021-03-27	fpubh-09-640454	Completed	08:52:52	Dinesh Kumar M	Senthilkumar	2	Gowtham M	2021-03-27 10:57:57	2021-03-27 11:02:54																												27-Mar-2021		27-Mar-2021
1	2021-03-27	fphy-09-513969	Completed	09:08:05	Sathya R	Janani K	3	Maheswari D	2021-03-27 09:55:55	2021-03-27 10:16:11																												27-Mar-2021		27-Mar-2021
2	2021-03-27	fvets-08-652351	Completed	09:09:58	Prakash A	Senthilkumar	5	Santhosh Kumar L	2021-03-27 10:53:00	2021-03-27 11:02:09	12:47:02	Prakash A	Divya A	4	Santhosh Kumar L	2021-03-27 12:51:31	2021-03-27 12:51:36																					27-Mar-2021		27-Mar-2021
1	2021-03-27	fnrgo-02-625343	Completed	09:13:40	Dinesh Kumar M	Durga B	2	Gowtham M	2021-03-27 11:03:01	2021-03-27 11:20:31																												27-Mar-2021		27-Mar-2021
1	2021-03-27	fphys-12-646903	Completed	09:18:14	Ajith L	Durga B	1	Santhosh Kumar L	2021-03-27 11:16:46	2021-03-27 11:17:34																												27-Mar-2021		27-Mar-2021
1	2021-03-27	fmedt-03-640569	Completed	09:39:11	Ajith L	Durga B	2	Santhosh Kumar L	2021-03-27 11:22:35	2021-03-27 11:31:08																												27-Mar-2021		27-Mar-2021
1	2021-03-27	fspor-03-638139	Completed	09:54:53	Ajith L	Nathiya S	1	Santhosh Kumar L	2021-03-27 11:26:18	2021-03-27 11:29:47																												27-Mar-2021		27-Mar-2021
1	2021-03-27	fpsyg-12-648667	Completed	09:56:35	Muthulakshmi R	Muthu Kumar M	10	Gowtham M	2021-03-27 11:42:37	2021-03-27 12:04:32																												27-Mar-2021		27-Mar-2021
1	2021-03-27	fpls-12-646144	Completed	09:58:05	Prakash A	Janani K	2	Santhosh Kumar L	2021-03-27 11:02:15	2021-03-27 11:04:08																												27-Mar-2021		27-Mar-2021
1	2021-03-27	fcell-09-662761	Completed	10:25:48	Uma Y	Aswini M	1	Maheswari D	2021-03-27 11:07:58	2021-03-27 11:09:59																												27-Mar-2021		27-Mar-2021
1	2021-03-27	fpubh-09-593553	Completed	10:26:41	Dinesh Kumar M	Sridhar G	2	Gowtham M	2021-03-27 12:04:44	2021-03-27 12:19:46																												27-Mar-2021		27-Mar-2021
1	2021-03-27	fimmu-12-620427	Completed	10:33:56	Renganath K	Durga B	10	Maheswari D	2021-03-27 11:21:03	2021-03-27 11:25:23																												27-Mar-2021		27-Mar-2021
1	2021-03-27	fpsyt-12-610457	Completed	10:48:44	Muthulakshmi R	Muthu Kumar M	8	Gowtham M	2021-03-27 12:39:05	2021-03-27 13:04:00																												27-Mar-2021		27-Mar-2021
1	2021-03-27	fpsyg-12-635202	Completed	10:51:34	Renganath K	Janani M	10	Maheswari D	2021-03-27 11:31:59	2021-03-27 11:37:11																												27-Mar-2021		27-Mar-2021
1	2021-03-27	fncel-15-653688	Completed	10:59:27	Buvanenthiran P	Saravanavel Murugan P	2	Santhosh Kumar L	2021-03-27 12:08:15	2021-03-27 12:09:13																												27-Mar-2021		27-Mar-2021
1	2021-03-27	fpsyg-12-647967	Completed	11:11:53	Renganath K	Kalaivani R	10	Maheswari D	2021-03-27 11:38:14	2021-03-27 11:40:29																												27-Mar-2021		27-Mar-2021
1	2021-03-27	fninf-15-630172	Completed	11:17:21	Prakash A	Janani K	6	Santhosh Kumar L	2021-03-27 11:41:45	2021-03-27 12:00:23																												27-Mar-2021		27-Mar-2021
1	2021-03-27	fneur-12-574649	Completed	11:37:42	Buvanenthiran P	Janani M	2	Santhosh Kumar L	2021-03-27 12:10:15	2021-03-27 12:12:38																												27-Mar-2021		27-Mar-2021
1	2021-03-27	fneur-12-632572	Completed	11:43:25	Dinesh Kumar M	Saravanavel Murugan P	2	Gowtham M	2021-03-27 12:20:18	2021-03-27 12:29:20																												27-Mar-2021		27-Mar-2021
1	2021-03-27	fpsyt-12-609020	Completed	11:53:47	Muthulakshmi R	Muthu Kumar M	6	Gowtham M	2021-03-27 13:04:05	2021-03-27 13:11:57																												27-Mar-2021		27-Mar-2021
1	2021-03-27	fneur-12-628296	Completed	11:54:26	Ajith L	Gopala Krishnan R	6	Santhosh Kumar L	2021-03-27 12:01:07	2021-03-27 12:06:40																												27-Mar-2021		27-Mar-2021
1	2021-03-27	fsoil-01-656591	Completed	12:06:45	Prakash A	Nathiya S	4	Santhosh Kumar L	2021-03-27 12:12:53	2021-03-27 12:17:07																												27-Mar-2021		27-Mar-2021
1	2021-03-27	fgene-12-638191	Completed	12:09:01	Dinesh Kumar M	SenthilKumar P	2	Gowtham M	2021-03-27 12:29:32	2021-03-27 12:38:25																												27-Mar-2021		27-Mar-2021
1	2021-03-27	fneur-12-637890	Completed	12:12:10	Buvanenthiran P	Divya A	2	Santhosh Kumar L	2021-03-27 12:17:47	2021-03-27 12:51:25																												27-Mar-2021		27-Mar-2021
1	2021-03-27	fmed-08-652638	Completed	12:21:11	Thomas S	Divya A	5	Maheswari D	2021-03-27 12:21:45	2021-03-27 12:26:17																												27-Mar-2021		27-Mar-2021
1	2021-03-27	fpsyt-12-581449	Completed	12:34:15	Renganath K	Gopala Krishnan R	10	Maheswari D	2021-03-27 12:34:39	2021-03-27 12:40:38																												27-Mar-2021		27-Mar-2021
1	2021-03-27	fmed-08-661358	Completed	12:35:35	Prakash A	Divya A	5	Santhosh Kumar L	2021-03-27 12:53:07	2021-03-27 13:11:05																												27-Mar-2021		27-Mar-2021
1	2021-03-27	fpubh-09-618962	Completed	12:39:25	Uma Y	Aswini M	6	Maheswari D	2021-03-27 12:40:47	2021-03-27 13:02:33																												27-Mar-2021		27-Mar-2021
1	2021-03-27	fneur-12-652059	Completed	12:59:45	Buvanenthiran P	Divya A	2	Santhosh Kumar L	2021-03-27 13:12:03	2021-03-27 13:18:02																												27-Mar-2021		27-Mar-2021
1	2021-03-27	fpsyt-12-633234	Completed	13:00:59	Renganath K	Divya A	10	Maheswari D	2021-03-27 13:02:41	2021-03-27 13:14:46																												27-Mar-2021		27-Mar-2021
1	2021-03-27	fmed-08-618185	Completed	13:02:37	Dinesh Kumar M	Sridhar G	2	Gowtham M	2021-03-27 13:12:11	2021-03-27 13:23:31																												27-Mar-2021		27-Mar-2021
2	2021-03-27	fmed-08-660688	Completed	13:10:05	Thomas S	Divya A	5	Maheswari D	2021-03-27 13:24:19	2021-03-27 13:32:26	14:42:55	Thomas S	Divya A	2	Maheswari D	2021-03-27 15:11:27	2021-03-27 15:48:08																					27-Mar-2021		27-Mar-2021
1	2021-03-27	fpsyg-12-659994	Completed	13:18:25	Prakash A	Janani M	5	Santhosh Kumar L	2021-03-27 13:29:05	2021-03-27 13:34:22																												27-Mar-2021		27-Mar-2021
1	2021-03-27	fmed-08-524059	Completed	13:19:39	Renganath K	Sridhar G	10	Maheswari D	2021-03-27 13:34:08	2021-03-27 13:38:54																												27-Mar-2021		27-Mar-2021
1	2021-03-27	fnut-08-639425	Completed	13:28:50	Uma Y	Aswini M	1	Maheswari D	2021-03-27 13:39:10	2021-03-27 13:45:21																												27-Mar-2021		27-Mar-2021
1	2021-03-27	fneur-12-661952	Completed	13:40:13	Buvanenthiran P	Saravanavel Murugan P	2	Santhosh Kumar L	2021-03-27 13:41:15	2021-03-27 13:42:11																												27-Mar-2021		27-Mar-2021
1	2021-03-27	fsens-02-657920	Completed	13:41:09	Thomas S	Senthilkumar	5	Maheswari D	2021-03-27 13:45:32	2021-03-27 13:52:11																												27-Mar-2021		27-Mar-2021
1	2021-03-27	fpubh-09-593176	Completed	13:45:02	Uma Y	Aswini M	3	Maheswari D	2021-03-27 13:52:23	2021-03-27 13:58:51																												27-Mar-2021		27-Mar-2021
1	2021-03-27	fpsyt-12-608231	Completed	13:52:27	Renganath K	Janani M	10	Gowtham M	2021-03-27 13:57:53	2021-03-27 14:04:27																												27-Mar-2021		27-Mar-2021
1	2021-03-27	fmats-08-669862	Completed	13:57:58	Thomas S	Kalaivani R	5	Maheswari D	2021-03-27 13:59:48	2021-03-27 14:04:12																												27-Mar-2021		27-Mar-2021
1	2021-03-27	fnmol-14-650498	Completed	14:09:56	Thomas S	Kalaivani R	5	Gowtham M	2021-03-27 14:51:46	2021-03-27 14:59:39																												27-Mar-2021		27-Mar-2021
1	2021-03-27	fpsyg-12-608413	Completed	14:21:05	Priyadharshini S	Aswini M	2	Gowtham M	2021-03-27 14:34:52	2021-03-27 14:48:03																												27-Mar-2021		27-Mar-2021
1	2021-03-27	fpsyg-12-543303	Completed	14:35:56	Amshaveni N	Sumithra P	5	Maheswari D	2021-03-27 15:15:21	2021-03-27 15:23:16																												27-Mar-2021		27-Mar-2021
1	2021-03-27	fnut-08-604296	Completed	14:40:07	Amshaveni N	Sumithra P	4	Maheswari D	2021-03-27 15:23:54	2021-03-27 15:35:57																												27-Mar-2021		27-Mar-2021
1	2021-03-27	fvets-08-641871	Completed	14:44:28	Uma Y	Durga B	4	Maheswari D	2021-03-27 15:50:15	2021-03-27 15:54:29																												27-Mar-2021		27-Mar-2021
1	2021-03-27	fmed-08-637872	Completed	14:44:32	Dinesh Kumar M	Aswini M	2	Gowtham M	2021-03-27 14:59:52	2021-03-27 15:06:48																												27-Mar-2021		27-Mar-2021
1	2021-03-27	fpsyt-12-640832	Completed	15:03:06	Sathya R	SenthilKumar P	5	Gowtham M	2021-03-27 15:07:08	2021-03-27 15:28:39																												27-Mar-2021		27-Mar-2021
1	2021-03-27	fneur-12-674626	Completed	15:14:15	Uma Y	Durga B	1	Maheswari D	2021-03-27 15:54:52	2021-03-27 15:56:59																												27-Mar-2021		27-Mar-2021
1	2021-03-27	fnagi-13-651973	Completed	15:15:46	Prakash A	Janani M	5	Santhosh Kumar L	2021-03-27 16:58:23	2021-03-27 17:00:16																												27-Mar-2021		27-Mar-2021
1	2021-03-27	fpsyt-12-659044	Completed	15:17:18	Dinesh Kumar M	Sridhar G	2	Gowtham M	2021-03-27 15:35:25	2021-03-27 15:54:48																												27-Mar-2021		27-Mar-2021
1	2021-03-27	fvets-08-552465	Completed	15:20:46	Priyadharshini S	Gopala Krishnan R	10	Gowtham M	2021-03-27 15:56:26	2021-03-27 16:37:54																												27-Mar-2021		27-Mar-2021
1	2021-03-27	fmed-08-656840	Completed	15:31:23	Sathya R	Divya A	5	Santhosh Kumar L	2021-03-27 15:39:40	2021-03-27 15:46:31																												27-Mar-2021		27-Mar-2021
1	2021-03-27	fsufs-05-504063	Completed	15:43:21	Muthulakshmi R	Kalaivani R	8	Gowtham M	2021-03-27 16:13:56	2021-03-27 16:32:33																												27-Mar-2021		27-Mar-2021
1	2021-03-27	fmed-08-659188	Completed	16:03:04	Sathya R	Divya A	5	Santhosh Kumar L	2021-03-27 16:54:40	2021-03-27 16:56:57																												27-Mar-2021		27-Mar-2021
1	2021-03-27	fped-09-598063	Completed	16:04:23	Ajith L	Sumithra P	2	Maheswari D	2021-03-27 16:35:41	2021-03-27 16:37:12																												27-Mar-2021		27-Mar-2021
1	2021-03-27	fpsyg-12-634722	Completed	16:04:25	Prakash A	Janani M	4	Santhosh Kumar L	2021-03-27 16:13:08	2021-03-27 16:15:19																												27-Mar-2021		27-Mar-2021
2	2021-03-27	fnut-08-609217	Completed	16:05:13	Ajith L	Aswini M	2	Maheswari D	2021-03-27 16:35:10	2021-03-27 16:35:16	16:44:42	Ajith L	Aswini M	1	Maheswari D	2021-03-27 16:52:37	2021-03-27 16:52:43																					27-Mar-2021		27-Mar-2021
1	2021-03-27	fonc-11-578928	Completed	16:06:18	Amshaveni N	SenthilKumar P	2	Maheswari D	2021-03-27 16:59:40	2021-03-27 17:14:23																												27-Mar-2021		27-Mar-2021
1	2021-03-27	fpsyt-12-595706	Completed	16:06:22	Prakash A	Janani M	4	Santhosh Kumar L	2021-03-27 16:09:43	2021-03-27 16:12:58																												27-Mar-2021		27-Mar-2021
1	2021-03-27	fpsyg-12-649195	Completed	16:18:37	Priyadharshini S	Aswini M	10	Gowtham M	2021-03-27 17:53:14	2021-03-27 18:10:06																												27-Mar-2021		27-Mar-2021
1	2021-03-27	fcvm-08-638954	Completed	16:20:34	Muthulakshmi R	Kalaivani R	6	Gowtham M	2021-03-27 17:31:38	2021-03-27 17:40:41																												27-Mar-2021		27-Mar-2021
1	2021-03-27	fmed-08-624924	Completed	16:22:04	Uma Y	Durga B	1	Maheswari D	2021-03-27 16:42:02	2021-03-27 16:58:08																												27-Mar-2021		27-Mar-2021
1	2021-03-27	fneur-12-620799	Completed	16:24:17	Sathya R	Divya A	5	Gowtham M	2021-03-27 19:07:11	2021-03-27 19:17:55																												27-Mar-2021		27-Mar-2021
1	2021-03-27	fpsyt-12-643957	Completed	16:29:21	Ajith L	Divya A	2	Maheswari D	2021-03-27 16:37:27	2021-03-27 16:39:33																												27-Mar-2021		27-Mar-2021
1	2021-03-27	fpsyg-12-612127	Completed	16:33:32	Dinesh Kumar M	Nathiya S	2	Gowtham M	2021-03-27 16:52:03	2021-03-27 17:06:50																												27-Mar-2021		27-Mar-2021
1	2021-03-27	fgwh-02-613338	Completed	16:39:04	Devilakshmi R	Saravanavel Murugan P	2	Gowtham M	2021-03-27 17:41:28	2021-03-27 17:51:54																												27-Mar-2021		27-Mar-2021
1	2021-03-27	fpubh-09-608810	Completed	16:43:49	Amshaveni N	Durga B	3	Maheswari D	2021-03-27 17:44:01	2021-03-27 17:50:23																												27-Mar-2021		27-Mar-2021
1	2021-03-27	fphys-12-658583	Completed	16:53:23	Prakash A	Janani M	5	Maheswari D	2021-03-27 17:14:39	2021-03-27 17:36:11																												27-Mar-2021		27-Mar-2021
1	2021-03-27	fpsyt-12-633730	Completed	16:57:27	Priyadharshini S	Aswini M	10	Gowtham M	2021-03-27 18:26:48	2021-03-27 18:39:09																												27-Mar-2021		27-Mar-2021
1	2021-03-27	fonc-11-646499	Completed	16:58:58	Buvanenthiran P	Divya A	2	Santhosh Kumar L	2021-03-27 17:02:06	2021-03-27 17:18:03																												27-Mar-2021		27-Mar-2021
1	2021-03-27	fimmu-12-638444	Completed	17:08:54	Sathya R	Punniyamoorthy K	5	Santhosh Kumar L	2021-03-27 18:13:47	2021-03-27 18:17:17																												27-Mar-2021		27-Mar-2021
1	2021-03-27	fchem-09-624511	Completed	17:27:52	Thomas S	Aswini M	2	Maheswari D	2021-03-27 17:50:33	2021-03-27 17:52:35																												27-Mar-2021		27-Mar-2021
1	2021-03-27	frwa-03-623476	Completed	17:49:17	Gowrishankar S	Senthilkumar	10	Santhosh Kumar L	2021-03-27 17:56:23	2021-03-27 18:11:15																												27-Mar-2021		27-Mar-2021
1	2021-03-27	fneur-12-543866	Completed	17:50:06	Devilakshmi R	Nathiya S	1	Gowtham M	2021-03-27 19:19:12	2021-03-27 19:23:33																												27-Mar-2021		27-Mar-2021
1	2021-03-27	fmolb-08-626827	Completed	17:53:59	Priyadharshini S	Kalaivani R	10	Gowtham M	2021-03-27 18:39:15	2021-03-27 19:05:26																												27-Mar-2021		27-Mar-2021
1	2021-03-27	fpubh-09-652197	Completed	17:54:26	Amshaveni N	Kalaivani R	5	Maheswari D	2021-03-27 18:13:34	2021-03-27 18:23:46																												27-Mar-2021		27-Mar-2021
1	2021-03-27	fnut-08-665482	Completed	17:59:42	Buvanenthiran P	Janani M	2	Santhosh Kumar L	2021-03-27 18:11:22	2021-03-27 18:13:39																												27-Mar-2021		27-Mar-2021
1	2021-03-27	fenvs-09-676011	Completed	18:05:17	Muthulakshmi R	Saravanavel Murugan P	5	Gowtham M	2021-03-27 18:10:30	2021-03-27 18:23:31																												27-Mar-2021		27-Mar-2021
1	2021-03-27	fchem-09-658548	Completed	18:12:26	Thomas S	Sumithra P	5	Maheswari D	2021-03-27 18:23:55	2021-03-27 18:28:46																												27-Mar-2021		27-Mar-2021
1	2021-03-27	fsoc-06-640384	Completed	18:17:41	Sathya R	Saravanavel Murugan P	2	Santhosh Kumar L	2021-03-27 18:18:47	2021-03-27 18:18:53																												27-Mar-2021		27-Mar-2021
1	2021-03-27	ffunb-02-655323	Completed	18:29:53	Devilakshmi R	Kalaivani R	3	Santhosh Kumar L	2021-03-27 19:16:44	2021-03-27 19:20:27																												27-Mar-2021		27-Mar-2021
1	2021-03-27	frwa-03-574684	Completed	18:36:03	Devilakshmi R	Aswini M	1	Santhosh Kumar L	2021-03-27 19:14:56	2021-03-27 19:15:46																												27-Mar-2021		27-Mar-2021
1	2021-03-27	fpsyg-12-603225	Completed	18:37:04	Buvanenthiran P	Janani M	2	Santhosh Kumar L	2021-03-27 18:46:47	2021-03-27 18:57:09																												27-Mar-2021		27-Mar-2021
1	2021-03-27	fsoil-01-630851	Completed	18:48:57	Gowrishankar S	Aswini M	3	Santhosh Kumar L	2021-03-27 18:57:15	2021-03-27 19:10:51																												27-Mar-2021		27-Mar-2021
1	2021-03-27	fpsyg-12-651817	Completed	19:05:15	Buvanenthiran P	Janani M	2	Santhosh Kumar L	2021-03-27 19:10:57	2021-03-27 19:14:50																												27-Mar-2021		27-Mar-2021
1	2021-03-27	fimmu-12-612271	Completed	19:20:06	Gowrishankar S	Durga B	7	Santhosh Kumar L	2021-03-27 19:20:49	2021-03-27 19:28:18																												27-Mar-2021		27-Mar-2021
1	2021-03-27	fpsyt-12-632519	Completed	19:24:03	Sathya R	Durga B	3	Santhosh Kumar L	2021-03-27 19:40:32	2021-03-27 19:43:30																												27-Mar-2021		27-Mar-2021
1	2021-03-27	fpsyt-12-607339	Completed	19:26:42	Buvanenthiran P	Sumithra P	2	Santhosh Kumar L	2021-03-27 19:28:23	2021-03-27 19:37:21																												27-Mar-2021		27-Mar-2021
1	2021-03-27	fchem-09-640665	Completed	19:36:58	Gowrishankar S	Durga B	3	Santhosh Kumar L	2021-03-27 19:37:37	2021-03-27 19:40:26																												27-Mar-2021		27-Mar-2021
1	2021-03-27	fpsyg-12-641770	Completed	19:40:46	Priyadharshini S	SenthilKumar P	10	Gowtham M	2021-03-27 19:58:44	2021-03-27 20:26:19																												27-Mar-2021		27-Mar-2021
1	2021-03-27	fmed-08-668709	Completed	20:01:35	Priyadharshini S	Kalaivani R	5	Gowtham M	2021-03-27 20:26:47	2021-03-27 20:56:33																												27-Mar-2021		27-Mar-2021
1	2021-03-27	fsufs-05-544072	Completed	20:03:33	Buvanenthiran P	Kalaivani R	4	Santhosh Kumar L	2021-03-27 20:10:48	2021-03-27 20:23:02																												27-Mar-2021		27-Mar-2021
1	2021-03-27	fcomm-06-599661	Completed	20:39:38	Gowrishankar S	Divya A	4	Santhosh Kumar L	2021-03-27 20:42:43	2021-03-27 20:47:32																												27-Mar-2021		27-Mar-2021
1	2021-03-27	fnhum-15-620439	Completed	20:53:39	Buvanenthiran P	Punniyamoorthy K	2	Santhosh Kumar L	2021-03-27 20:56:11	2021-03-27 21:24:58																												27-Mar-2021		27-Mar-2021
1	2021-03-27	fmed-08-630870	Completed	21:00:27	Priyadharshini S	Muthu Kumar M	10	Gowtham M	2021-03-27 21:29:14	2021-03-27 21:43:49																												27-Mar-2021		27-Mar-2021
1	2021-03-27	fcvm-08-655226	Completed	21:09:59	Priyadharshini S	Gopala Krishnan R	8	Gowtham M	2021-03-27 21:43:54	2021-03-27 21:48:16																												27-Mar-2021		27-Mar-2021
1	2021-03-27	fcvm-08-653648	Completed	21:59:37	Gowrishankar S	Janani M	6	Santhosh Kumar L	2021-03-27 22:01:17	2021-03-27 22:04:30																												27-Mar-2021		27-Mar-2021
1	2021-03-29	fpsyt-12-591934	Completed	06:10:00	Gowthami L	SenthilKumar P	2	Usha Nandhini S	2021-03-29 07:20:10	2021-03-29 07:20:21																												29-Mar-2021		29-Mar-2021
2	2021-03-29	frma-06-630124	Completed	06:24:56	Gowthami L	SenthilKumar P	1	Usha Nandhini S	2021-03-29 07:20:53	2021-03-29 07:22:24	09:10:01	Gowthami L	Janani K	1	Usha Nandhini S	2021-03-29 09:19:16	2021-03-29 09:19:28																					29-Mar-2021		29-Mar-2021
1	2021-03-29	fpsyt-12-623765	Completed	06:33:53	Ajith L	SenthilKumar P	3	Usha Nandhini S	2021-03-29 07:31:04	2021-03-29 07:37:48																												29-Mar-2021		29-Mar-2021
2	2021-03-29	fonc-11-644994	Completed	06:41:53	Gowthami L	SenthilKumar P	1	Usha Nandhini S	2021-03-29 07:24:26	2021-03-29 07:27:07	09:36:09	Gowthami L	Janani K	2	Usha Nandhini S	2021-03-29 09:41:56	2021-03-29 09:44:36																					29-Mar-2021		29-Mar-2021
1	2021-03-29	fpsyt-12-639936	Completed	06:46:11	Ajith L	SenthilKumar P	3	Usha Nandhini S	2021-03-29 07:38:21	2021-03-29 07:44:34																												29-Mar-2021		29-Mar-2021
2	2021-03-29	fpsyg-12-673092	Completed	06:48:30	Thomas S	Nathiya S	5				06:53:20	Thomas S	Nathiya S	0	Usha Nandhini S	2021-03-29 07:50:08	2021-03-29 07:50:15																					29-Mar-2021		00-Jan-1900
1	2021-03-29	fpubh-09-561873	Completed	06:59:41	Gowthami L	SenthilKumar P	2	Usha Nandhini S	2021-03-29 07:27:37	2021-03-29 07:30:28																												29-Mar-2021		29-Mar-2021
1	2021-03-29	fneur-12-627981	Completed	07:19:32	Ajith L	SenthilKumar P	12	Usha Nandhini S	2021-03-29 09:53:04	2021-03-29 10:17:25																												29-Mar-2021		29-Mar-2021
1	2021-03-29	fchem-09-679332	Completed	07:23:32	Mohan R	Durga B	5	Usha Nandhini S	2021-03-29 07:52:16	2021-03-29 07:57:59																												29-Mar-2021		29-Mar-2021
1	2021-03-29	fnagi-13-658605	Completed	07:24:37	Uma Y	SenthilKumar P	15	Gopala Krishnan R	2021-03-29 20:04:50	2021-03-29 20:05:01																												29-Mar-2021		29-Mar-2021
1	2021-03-29	fpsyt-12-557299	Completed	07:46:50	Uma Y	SenthilKumar P	8	Usha Nandhini S	2021-03-29 10:23:25	2021-03-29 10:40:31																												29-Mar-2021		29-Mar-2021
1	2021-03-29	fnins-15-651141	Completed	07:58:08	Ajith L	SenthilKumar P	4	Usha Nandhini S	2021-03-29 08:05:01	2021-03-29 08:25:46																												29-Mar-2021		29-Mar-2021
1	2021-03-29	fpubh-09-655447	Completed	07:59:52	Muthulakshmi R	Saravanavel Murugan P	25	Nathiya S	2021-03-29 08:51:50																													29-Mar-2021		29-Mar-2021
1	2021-03-29	fnins-15-549322	Completed	08:02:39	Sathya R	Saravanavel Murugan P	5	Usha Nandhini S	2021-03-29 08:27:39	2021-03-29 08:37:01																												29-Mar-2021		29-Mar-2021
1	2021-03-29	fmed-08-641633	Completed	08:27:52	Gowthami L	Janani K	5	Usha Nandhini S	2021-03-29 08:37:37	2021-03-29 09:07:02																												29-Mar-2021		29-Mar-2021
1	2021-03-29	fphys-12-674951	Completed	08:52:40	Sathya R	Gopala Krishnan R	2	Usha Nandhini S	2021-03-29 09:09:23	2021-03-29 09:19:05																												29-Mar-2021		29-Mar-2021
1	2021-03-29	feduc-06-618323	Completed	08:59:00	Mohan R	SenthilKumar P	10	Usha Nandhini S	2021-03-29 09:24:30	2021-03-29 09:32:02																												29-Mar-2021		29-Mar-2021
1	2021-03-29	fped-09-646684	Completed	08:59:46	Ajith L	Kalaivani R	4	Usha Nandhini S	2021-03-29 09:33:48	2021-03-29 09:40:44																												29-Mar-2021		29-Mar-2021
1	2021-03-29	fmars-08-673141	Completed	09:11:31	Dinesh Kumar M	Gopala Krishnan R	0	Usha Nandhini S	2021-03-29 09:20:49	2021-03-29 09:23:58																												29-Mar-2021		29-Mar-2021
1	2021-03-29	fneur-12-638574	Completed	09:13:26	Gowthami L	Janani K	1	Usha Nandhini S	2021-03-29 09:19:39	2021-03-29 09:19:44																												29-Mar-2021		29-Mar-2021
1	2021-03-29	fnbeh-15-639372	Completed	09:15:00	Renganath K	Sridhar G	5	Usha Nandhini S	2021-03-29 10:45:38	2021-03-29 10:49:47																												29-Mar-2021		29-Mar-2021
1	2021-03-29	fnagi-13-643685	Completed	09:23:01	Sathya R	Saravanavel Murugan P	5	Usha Nandhini S	2021-03-29 10:41:06	2021-03-29 10:45:02																												29-Mar-2021		29-Mar-2021
2	2021-03-29	fneur-12-651157	Completed	09:29:59	Ajith L	SenthilKumar P	1	Usha Nandhini S	2021-03-29 10:50:53	2021-03-29 10:54:23	11:23:51	Ajith L	SenthilKumar P	1	Usha Nandhini S	2021-03-29 11:36:21	2021-03-29 11:37:41																					29-Mar-2021		29-Mar-2021
1	2021-03-29	fpsyg-12-648013	Completed	09:56:02	Uma Y	SenthilKumar P	20	Nathiya S	2021-03-29 15:22:27	2021-03-29 15:53:58																												29-Mar-2021		29-Mar-2021
1	2021-03-29	fbioe-09-614325	Completed	10:00:00	Dinesh Kumar M	SenthilKumar P	2	Usha Nandhini S	2021-03-29 10:17:58	2021-03-29 10:21:55																												29-Mar-2021		29-Mar-2021
1	2021-03-29	fmed-08-592357	Completed	10:24:24	Uma Y	SenthilKumar P	1	Usha Nandhini S	2021-03-29 10:55:59	2021-03-29 11:09:39																												29-Mar-2021		29-Mar-2021
1	2021-03-29	fimmu-12-659621	Completed	10:56:26	Gowthami L	Nathiya S	3	Usha Nandhini S	2021-03-29 11:01:42	2021-03-29 11:05:17																												29-Mar-2021		29-Mar-2021
1	2021-03-29	fvets-08-642809	Completed	11:00:54	Muthulakshmi R	Saravanavel Murugan P	2	Usha Nandhini S	2021-03-29 11:16:32	2021-03-29 15:10:30																												29-Mar-2021		29-Mar-2021
1	2021-03-29	fmed-08-626000	Completed	11:03:47	Dinesh Kumar M	Aswini M	2	Usha Nandhini S	2021-03-29 13:35:30	2021-03-29 13:38:26																												29-Mar-2021		29-Mar-2021
1	2021-03-29	fpubh-09-578200	Completed	11:07:22	Mohan R	SenthilKumar P	10	Usha Nandhini S	2021-03-29 11:39:01	2021-03-29 11:53:29																												29-Mar-2021		29-Mar-2021
1	2021-03-29	fmars-08-611742	Completed	11:15:28	Uma Y	SenthilKumar P	2	Nathiya S	2021-03-29 13:36:44	2021-03-29 14:12:11																												29-Mar-2021		29-Mar-2021
1	2021-03-29	fnut-08-605396	Completed	11:16:19	Ajith L	Sridhar G	4	Usha Nandhini S	2021-03-29 11:54:39	2021-03-29 12:05:52																												29-Mar-2021		29-Mar-2021
1	2021-03-29	ffgc-04-654032	Completed	11:21:33	Mohan R	Divya A	6	Usha Nandhini S	2021-03-29 12:38:31	2021-03-29 12:42:16																												29-Mar-2021		29-Mar-2021
1	2021-03-29	fphys-12-676826	Completed	11:35:13	Ajith L	SenthilKumar P	1	Usha Nandhini S	2021-03-29 12:45:00	2021-03-29 12:49:09																												29-Mar-2021		29-Mar-2021
1	2021-03-29	fpsyt-12-629904	Completed	11:39:11	Renganath K	Gopala Krishnan R	10	Nathiya S	2021-03-29 12:56:54	2021-03-29 13:02:16																												29-Mar-2021		29-Mar-2021
1	2021-03-29	fmed-08-662358	Completed	11:51:19	Dinesh Kumar M	Kalaivani R	2	Usha Nandhini S	2021-03-29 12:17:29	2021-03-29 12:21:43																												29-Mar-2021		29-Mar-2021
1	2021-03-29	fnut-08-624283	Completed	11:53:46	Renganath K	Gopala Krishnan R	5	Nathiya S	2021-03-29 12:51:46	2021-03-29 12:54:30																												29-Mar-2021		29-Mar-2021
2	2021-03-29	fnbeh-15-586159	Completed	11:58:08	Gowthami L	Janani K	5	Usha Nandhini S	2021-03-29 12:22:26	2021-03-29 12:28:33	15:06:09	Gowthami L	Janani K	1	Usha Nandhini S	2021-03-29 15:10:38	2021-03-29 15:14:23																					29-Mar-2021		29-Mar-2021
1	2021-03-29	fneur-12-646014	Completed	11:59:24	Priyadharshini S	Janani M	10	Usha Nandhini S	2021-03-29 12:49:55	2021-03-29 13:11:06																												29-Mar-2021		29-Mar-2021
1	2021-03-29	fimmu-12-653836	Completed	12:00:43	Mohan R	Sridhar G	6	Usha Nandhini S	2021-03-29 13:01:30	2021-03-29 13:09:07																												29-Mar-2021		29-Mar-2021
1	2021-03-29	fmed-08-645589	Completed	12:04:37	Renganath K	Janani K	5	Nathiya S	2021-03-29 12:33:25	2021-03-29 12:36:38																												29-Mar-2021		29-Mar-2021
1	2021-03-29	fpsyt-12-653674	Completed	12:05:56	Manoj B	Aswini M	4	Gowtham M	2021-03-29 15:10:11	2021-03-29 15:27:37																												29-Mar-2021		29-Mar-2021
1	2021-03-29	fpsyt-12-642976	Completed	12:14:01	Muthulakshmi R	Saravanavel Murugan P	6	Nathiya S	2021-03-29 12:36:54	2021-03-29 12:50:41																												29-Mar-2021		29-Mar-2021
1	2021-03-29	fnut-08-661455	Completed	12:21:49	Uma Y	SenthilKumar P	8	Nathiya S	2021-03-29 13:07:57	2021-03-29 13:52:51																												29-Mar-2021		29-Mar-2021
1	2021-03-29	fpsyt-12-631589	Completed	12:24:00	Gowthami L	Saravanavel Murugan P	4	Usha Nandhini S	2021-03-29 13:58:27	2021-03-29 14:31:26																												29-Mar-2021		29-Mar-2021
1	2021-03-29	fphy-09-677808	Completed	12:25:15	Dinesh Kumar M	Gopala Krishnan R	2	Usha Nandhini S	2021-03-29 13:24:28	2021-03-29 13:26:10																												29-Mar-2021		29-Mar-2021
1	2021-03-29	fcomm-06-627316	Completed	12:25:11	Renganath K	Gopala Krishnan R	5	Nathiya S	2021-03-29 12:29:10	2021-03-29 12:33:09																												29-Mar-2021		29-Mar-2021
1	2021-03-29	fpsyt-12-630697	Completed	12:41:28	Thomas S	SenthilKumar P	5	Gowtham M	2021-03-29 15:29:34	2021-03-29 15:42:08																												29-Mar-2021		29-Mar-2021
1	2021-03-29	fpsyg-12-576943	Completed	12:44:12	Ajith L	Muthu Kumar M	7	Usha Nandhini S	2021-03-29 13:45:03	2021-03-29 13:54:09																												29-Mar-2021		29-Mar-2021
1	2021-03-29	fneur-12-653833	Completed	12:45:46	Priyadharshini S	Sridhar G	10	Gowtham M	2021-03-29 14:14:22	2021-03-29 14:25:32																												29-Mar-2021		29-Mar-2021
1	2021-03-29	fmed-08-605639	Completed	12:46:10	Mohan R	Janani M	2	Usha Nandhini S	2021-03-29 13:11:16	2021-03-29 13:13:24																												29-Mar-2021		29-Mar-2021
1	2021-03-29	fneur-12-658695	Completed	12:46:45	Renganath K	Muthu Kumar M	10	Nathiya S	2021-03-29 13:02:49	2021-03-29 13:07:40																												29-Mar-2021		29-Mar-2021
1	2021-03-29	fsoc-06-610432	Completed	12:55:52	Muthulakshmi R	Saravanavel Murugan P	10	Nathiya S	2021-03-29 14:12:46	2021-03-29 14:56:13																												29-Mar-2021		29-Mar-2021
1	2021-03-29	fmed-08-656926	Completed	13:01:45	Gowthami L	Sumithra P	5	Gowtham M	2021-03-29 14:53:49	2021-03-29 15:05:58																												29-Mar-2021		29-Mar-2021
1	2021-03-29	fpubh-09-638964	Completed	13:02:05	Manoj B	Gopala Krishnan R	3	Santhosh Kumar L	2021-03-29 15:05:33	2021-03-29 15:13:47																												29-Mar-2021		29-Mar-2021
1	2021-03-29	fdmed-02-654911	Completed	13:03:11	Mohan R	Janani K	5	Usha Nandhini S	2021-03-29 13:14:09	2021-03-29 13:23:57																												29-Mar-2021		29-Mar-2021
1	2021-03-29	fneur-12-627712	Completed	13:10:47	Renganath K	Durga B	10	SenthilKumar P	2021-03-29 18:15:53	2021-03-29 18:33:03																												29-Mar-2021		29-Mar-2021
1	2021-03-29	frobt-08-652417	Completed	13:19:42	Dinesh Kumar M	Sumithra P	2	Usha Nandhini S	2021-03-29 13:26:44	2021-03-29 13:32:03																												29-Mar-2021		29-Mar-2021
1	2021-03-29	fneur-12-623913	Completed	13:19:54	Mohan R	Kalaivani R	2	Usha Nandhini S	2021-03-29 13:39:48	2021-03-29 13:42:08																												29-Mar-2021		29-Mar-2021
1	2021-03-29	fpsyg-12-645793	Completed	13:22:34	Ajith L	Sridhar G	2	Santhosh Kumar L	2021-03-29 14:35:55	2021-03-29 14:37:54																												29-Mar-2021		29-Mar-2021
1	2021-03-29	fneur-12-666438	Completed	13:29:29	Priyadharshini S	Janani M	10	Gowtham M	2021-03-29 14:25:52	2021-03-29 14:34:29																												29-Mar-2021		29-Mar-2021
3	2021-03-29	fmed-08-650581	Completed	13:34:32	Gowthami L	Kalaivani R	5	Santhosh Kumar L	2021-03-29 14:39:43	2021-03-29 14:48:06	15:18:40	Gowthami L	Sumithra P	3	Santhosh Kumar L	2021-03-29 15:19:52	2021-03-29 15:42:30	16:38:05	Gowthami L	Saravanavel Murugan P	1	Santhosh Kumar L	2021-03-29 16:41:48	2021-03-29 16:43:56														29-Mar-2021		29-Mar-2021
1	2021-03-29	fpsyg-12-662604	Completed	13:36:12	Ajith L	Kalaivani R	1	Santhosh Kumar L	2021-03-29 14:32:50	2021-03-29 14:34:36																												29-Mar-2021		29-Mar-2021
1	2021-03-29	fncel-15-634020	Completed	13:36:59	Renganath K	Gopala Krishnan R	10	Santhosh Kumar L	2021-03-29 14:58:45	2021-03-29 15:00:00																												29-Mar-2021		29-Mar-2021
1	2021-03-29	fpsyt-12-652254	Completed	13:45:34	Uma Y	Aswini M	4	Gowtham M	2021-03-29 14:41:56	2021-03-29 14:49:13																												29-Mar-2021		29-Mar-2021
1	2021-03-29	fcell-09-678589	Completed	14:43:19	Gowthami L	Gopala Krishnan R	2	Gowtham M	2021-03-29 14:50:55	2021-03-29 14:53:43																												29-Mar-2021		29-Mar-2021
2	2021-03-29	fchem-09-668553	Completed	15:10:43	Manoj B	Vignesh V	2	Santhosh Kumar L	2021-03-29 15:13:56	2021-03-29 15:19:40	19:46:30	Sathya R	Vignesh V	3	Gowtham M	2021-03-29 19:55:27	2021-03-29 19:58:39																					29-Mar-2021		29-Mar-2021
1	2021-03-29	fspas-08-656907	Completed	15:26:16	Renganath K	Saravanavel Murugan P	10	SenthilKumar P	2021-03-29 17:44:16	2021-03-29 19:35:41																												29-Mar-2021		29-Mar-2021
1	2021-03-29	fimmu-12-640251	Completed	15:26:28	Muthulakshmi R	Aswini M	3	Gowtham M	2021-03-29 19:13:20	2021-03-29 19:21:21																												29-Mar-2021		29-Mar-2021
1	2021-03-29	fneur-12-643964	Completed	15:30:50	Uma Y	Sridhar G	2	Gowtham M	2021-03-29 17:30:30	2021-03-29 17:38:28																												29-Mar-2021		29-Mar-2021
1	2021-03-29	fneur-12-631134	Completed	15:33:35	Priyadharshini S	Gopala Krishnan R	10	Gowtham M	2021-03-29 20:52:28	2021-03-29 21:02:02																												29-Mar-2021		29-Mar-2021
1	2021-03-29	fmed-08-648727	Completed	15:48:04	Renganath K	SenthilKumar P	10	SenthilKumar P	2021-03-29 17:38:38	2021-03-29 17:44:10																												29-Mar-2021		29-Mar-2021
2	2021-03-29	fpubh-09-581497	Completed	15:49:22	Ajith L	Durga B	2	Santhosh Kumar L	2021-03-29 16:39:12	2021-03-29 16:41:17	17:07:08	Ajith L	Durga B	1	Santhosh Kumar L	2021-03-29 17:08:25	2021-03-29 17:21:03																					29-Mar-2021		29-Mar-2021
1	2021-03-29	fpsyg-12-632641	Completed	16:10:45	Priyadharshini S	Durga B	10	Gowtham M	2021-03-29 21:02:10	2021-03-29 21:14:51																												29-Mar-2021		29-Mar-2021
1	2021-03-29	fpubh-09-650392	Completed	16:20:56	Ajith L	Sridhar G	1	Santhosh Kumar L	2021-03-29 16:36:55	2021-03-29 16:37:59																												29-Mar-2021		29-Mar-2021
1	2021-03-29	fmed-08-655530	Completed	16:27:15	Renganath K	SenthilKumar P	10	Santhosh Kumar L	2021-03-29 17:24:38	2021-03-29 17:27:37																												29-Mar-2021		29-Mar-2021
1	2021-03-29	fpsyg-12-655154	Completed	16:32:46	Priyadharshini S	Kalaivani R	10	Santhosh Kumar L	2021-03-29 18:03:32	2021-03-29 18:10:09																												29-Mar-2021		29-Mar-2021
1	2021-03-29	fmech-07-651149	Completed	16:53:28	Ajith L	Muthu Kumar M	5	Usha Nandhini S	2021-03-30 07:42:27	2021-03-30 07:49:32																												29-Mar-2021		30-Mar-2021
1	2021-03-29	fpsyg-12-665728	Completed	16:54:52	Priyadharshini S	Nathiya S	5	Santhosh Kumar L	2021-03-29 21:35:22	2021-03-29 21:36:11																												29-Mar-2021		29-Mar-2021
1	2021-03-29	fnagi-13-652575	Completed	17:14:19	Sathya R	Saravanavel Murugan P	5	Gowtham M	2021-03-29 19:58:46	2021-03-29 20:03:15																												29-Mar-2021		29-Mar-2021
1	2021-03-29	fpsyg-12-616471	Completed	17:21:28	Dinesh Kumar M	Kalaivani R	2	SenthilKumar P	2021-03-29 18:33:19	2021-03-29 19:11:07																												29-Mar-2021		29-Mar-2021
1	2021-03-29	fncom-15-654315	Completed	17:26:44	Gowrishankar S	Sumithra P	6	Santhosh Kumar L	2021-03-29 17:35:02	2021-03-29 17:41:10																												29-Mar-2021		29-Mar-2021
1	2021-03-29	fcomm-06-610920	Completed	17:33:16	Manoj B	Aswini M	3	Gowtham M	2021-03-29 21:29:02	2021-03-29 22:00:24																												29-Mar-2021		29-Mar-2021
1	2021-03-29	fsufs-05-618453	Completed	17:37:41	Amshaveni N	Sumithra P	7	Santhosh Kumar L	2021-03-29 17:42:39	2021-03-29 17:45:33																												29-Mar-2021		29-Mar-2021
1	2021-03-29	fpubh-09-657784	Completed	17:51:57	Priyadharshini S	Kalaivani R	8	Santhosh Kumar L	2021-03-29 18:01:11	2021-03-29 18:02:01																												29-Mar-2021		29-Mar-2021
1	2021-03-29	fneur-12-658661	Completed	18:01:08	Sathya R	Muthu Kumar M	5	Santhosh Kumar L	2021-03-29 18:16:10	2021-03-29 18:16:55																												29-Mar-2021		29-Mar-2021
1	2021-03-29	fpsyg-12-653941	Completed	18:14:27	Gowrishankar S	Janani K	4	Santhosh Kumar L	2021-03-29 18:17:16	2021-03-29 18:18:46																												29-Mar-2021		29-Mar-2021
1	2021-03-29	fpubh-09-628630	Completed	18:25:07	Sathya R	Muthu Kumar M	5	Santhosh Kumar L	2021-03-29 20:11:19	2021-03-29 20:12:12																												29-Mar-2021		29-Mar-2021
1	2021-03-29	fsufs-05-650727	Completed	18:46:38	Gowthami L	Divya A	5	Gowtham M	2021-03-29 19:32:41	2021-03-29 19:52:39																												29-Mar-2021		29-Mar-2021
1	2021-03-29	fmicb-12-618169	Completed	19:10:25	Gowrishankar S	Janani M	3	Santhosh Kumar L	2021-03-29 19:51:57	2021-03-29 19:53:23																												29-Mar-2021		29-Mar-2021
1	2021-03-29	fonc-11-607989	Completed	19:23:56	Sathya R	Gopala Krishnan R	2	Santhosh Kumar L	2021-03-29 20:13:20	2021-03-29 20:15:16																												29-Mar-2021		29-Mar-2021
1	2021-03-29	fmed-08-605912	Completed	19:28:08	Sathya R	Saravanavel Murugan P	2	Santhosh Kumar L	2021-03-29 20:16:21	2021-03-29 20:19:03																												29-Mar-2021		29-Mar-2021
1	2021-03-29	fpls-12-609975	Completed	19:39:13	Priyadharshini S	Saravanavel Murugan P	10	Gowtham M	2021-03-29 21:15:01	2021-03-29 21:28:36																												29-Mar-2021		29-Mar-2021
1	2021-03-29	fneur-12-648532	Completed	19:42:52	Amshaveni N	Durga B	3	Santhosh Kumar L	2021-03-29 20:37:45	2021-03-29 20:41:53																												29-Mar-2021		29-Mar-2021
1	2021-03-29	fcvm-08-634774	Completed	19:45:00	Amshaveni N	Muthu Kumar M	2	Santhosh Kumar L	2021-03-29 20:43:26	2021-03-29 20:45:11																												29-Mar-2021		29-Mar-2021
1	2021-03-29	fped-09-645814	Completed	19:46:00	Mahalingam K	Janani K	7	Santhosh Kumar L	2021-03-29 19:53:36	2021-03-29 20:10:05																												29-Mar-2021		29-Mar-2021
1	2021-03-29	fmed-08-642864	Completed	19:59:03	Gowthami L	Punniyamoorthy K	5	Gowtham M	2021-03-29 20:04:17	2021-03-29 20:30:25																												29-Mar-2021		29-Mar-2021
1	2021-03-29	fnano-03-638442	Completed	20:03:00	Buvanenthiran P	Nathiya S	2	Santhosh Kumar L	2021-03-29 20:19:26	2021-03-29 20:31:53																												29-Mar-2021		29-Mar-2021
1	2021-03-29	fnut-08-645099	Completed	20:10:03	Gowrishankar S	Sridhar G	3	Santhosh Kumar L	2021-03-29 20:25:19	2021-03-29 20:27:15																												29-Mar-2021		29-Mar-2021
1	2021-03-29	fnhum-15-617943	Completed	20:30:41	Mahalingam K	Durga B	9	Santhosh Kumar L	2021-03-29 20:32:21	2021-03-29 20:45:27																												29-Mar-2021		29-Mar-2021
1	2021-03-29	fmed-08-611989	Completed	20:41:24	Buvanenthiran P	Kalaivani R	2	Santhosh Kumar L	2021-03-29 20:45:37	2021-03-29 21:04:07																												29-Mar-2021		29-Mar-2021
1	2021-03-29	fsufs-05-602350	Completed	21:03:24	Mahalingam K	Kalaivani R	9	Santhosh Kumar L	2021-03-29 21:04:16	2021-03-29 21:06:31																												29-Mar-2021		29-Mar-2021
1	2021-03-29	fneur-12-645138	Completed	21:04:15	Buvanenthiran P	Saravanavel Murugan P	3	Santhosh Kumar L	2021-03-29 21:06:38	2021-03-29 21:12:33																												29-Mar-2021		29-Mar-2021
1	2021-03-29	fped-09-602552	Completed	21:04:55	Gowrishankar S	Vignesh V	3	Santhosh Kumar L	2021-03-29 21:12:49	2021-03-29 21:26:23																												29-Mar-2021		29-Mar-2021
1	2021-03-29	fmolb-08-645216	Completed	21:48:34	Gowrishankar S	Saravanavel Murugan P	3	Santhosh Kumar L	2021-03-29 21:48:51	2021-03-29 21:50:27																												29-Mar-2021		29-Mar-2021
1	2021-03-29	fpls-12-631117	Completed	21:50:01	Buvanenthiran P	Kalaivani R	3	Santhosh Kumar L	2021-03-29 21:50:34	2021-03-29 21:54:03																												29-Mar-2021		29-Mar-2021
1	2021-03-29	fenrg-09-636782	Completed	22:07:25	Priyadharshini S	Saravanavel Murugan P	20	Gowtham M	2021-03-29 22:08:18	2021-03-29 22:28:20																												29-Mar-2021		29-Mar-2021
1	2021-03-29	fpsyg-12-619036	Completed	22:09:20	Buvanenthiran P	Sridhar G	3	Santhosh Kumar L	2021-03-29 22:10:06	2021-03-29 22:11:27																												29-Mar-2021		29-Mar-2021
1	2021-03-29	fsufs-05-646980	Completed	22:37:10	Mahalingam K	Sumithra P	11	Santhosh Kumar L	2021-03-29 22:43:47	2021-03-29 22:52:27																												29-Mar-2021		29-Mar-2021
1	2021-03-29	fneur-12-645088	Completed	22:40:47	Gowrishankar S	Janani M	3	Santhosh Kumar L	2021-03-29 22:52:41	2021-03-29 22:53:55																												29-Mar-2021		29-Mar-2021
1	2021-03-29	fvets-08-647108	Completed	23:11:27	Mahalingam K	Durga B	7	Santhosh Kumar L	2021-03-29 23:13:22	2021-03-29 23:28:42																												29-Mar-2021		29-Mar-2021
1	2021-03-29	fpsyg-12-627095	Completed	23:47:23	Gowrishankar S	Durga B	5	Santhosh Kumar L	2021-03-29 23:49:03	2021-03-29 23:56:18																												29-Mar-2021		29-Mar-2021
1	2021-03-29	frsus-02-648138	Completed	23:52:35	Thomas S	Sridhar G	5	Santhosh Kumar L	2021-03-30 00:57:49	2021-03-30 01:00:48																												29-Mar-2021		30-Mar-2021
1	2021-03-30	fvets-08-665072	Completed	00:06:25	Mahalingam K	Gopala Krishnan R	7	Santhosh Kumar L	2021-03-30 00:08:00	2021-03-30 00:13:08																												30-Mar-2021		30-Mar-2021
1	2021-03-30	fpsyt-12-579566	Completed	00:19:44	Mahalingam K	Gopala Krishnan R	1	Santhosh Kumar L	2021-03-30 00:23:45	2021-03-30 00:26:19																												30-Mar-2021		30-Mar-2021
1	2021-03-30	fpsyg-12-627968	Completed	00:32:22	Gowrishankar S	SenthilKumar P	11	Santhosh Kumar L	2021-03-30 00:33:19	2021-03-30 00:40:21																												30-Mar-2021		30-Mar-2021
1	2021-03-30	fcell-09-662761	Completed	00:33:49	Mahalingam K	Gopala Krishnan R	3	Santhosh Kumar L	2021-03-30 00:40:38	2021-03-30 00:44:49																												30-Mar-2021		30-Mar-2021
2	2021-03-30	fsoc-06-614713	Completed	00:52:13	Thomas S	Muthu Kumar M	5	Maheswari D	2021-03-30 07:24:45	2021-03-30 07:32:47	09:19:19	Thomas S	Muthu Kumar M	5	Maheswari D	2021-03-30 11:31:41	2021-03-30 11:38:57																					30-Mar-2021		30-Mar-2021
1	2021-03-30	fpsyt-12-498096	Completed	01:27:36	Thomas S	Durga B	5	Maheswari D	2021-03-30 07:32:55	2021-03-30 09:47:02																												30-Mar-2021		30-Mar-2021
1	2021-03-30	fpubh-09-632024	Completed	01:37:42	Thomas S	Gopala Krishnan R	5	Maheswari D	2021-03-30 07:44:05	2021-03-30 07:48:19																												30-Mar-2021		30-Mar-2021
1	2021-03-30	fpubh-09-658544	Completed	02:16:04	Thomas S	Saravanavel Murugan P	5	Maheswari D	2021-03-30 07:48:31	2021-03-30 11:31:27																												30-Mar-2021		30-Mar-2021
1	2021-03-30	fpsyt-12-557834	Completed	06:42:14	Amshaveni N	Sumithra P	2	Maheswari D	2021-03-30 07:21:53	2021-03-30 07:24:35																												30-Mar-2021		30-Mar-2021
1	2021-03-30	fspor-03-618990	Completed	06:45:24	Ajith L	Sridhar G	3	Usha Nandhini S	2021-03-30 07:29:21	2021-03-30 07:29:26																												30-Mar-2021		30-Mar-2021
1	2021-03-30	fpsyg-12-638004	Completed	06:51:46	Gowthami L	Kalaivani R	1	Maheswari D	2021-03-30 07:04:34	2021-03-30 07:11:45																												30-Mar-2021		30-Mar-2021
1	2021-03-30	frobt-08-645956	Completed	06:59:52	Gowthami L	Kalaivani R	2	Maheswari D	2021-03-30 07:11:54	2021-03-30 07:21:42																												30-Mar-2021		30-Mar-2021
1	2021-03-30	fcell-09-631011	Completed	07:11:12	Ajith L	Sridhar G	6	Usha Nandhini S	2021-03-30 07:30:06	2021-03-30 07:52:36																												30-Mar-2021		30-Mar-2021
1	2021-03-30	fpubh-09-630449	Completed	07:13:49	Uma Y	Nathiya S	1	Usha Nandhini S	2021-03-30 09:11:47	2021-03-30 09:14:35																												30-Mar-2021		30-Mar-2021
1	2021-03-30	fped-09-647937	Completed	07:20:09	Thomas S	Janani M	5	Maheswari D	2021-03-30 08:33:12	2021-03-30 08:43:31																												30-Mar-2021		30-Mar-2021
1	2021-03-30	frym-09-585489	Completed	07:23:37	Sathya R	Nathiya S	2	Nathiya S	2021-03-30 09:47:44	2021-03-30 09:52:51																												30-Mar-2021		30-Mar-2021
2	2021-03-30	fmars-08-658384	Completed	07:41:28	Ajith L	Sridhar G	3	Usha Nandhini S	2021-03-30 07:53:12	2021-03-30 08:16:58	09:52:34	Ajith L	Kalaivani R	1	Usha Nandhini S	2021-03-30 10:06:55	2021-03-30 10:07:01																					30-Mar-2021		30-Mar-2021
1	2021-03-30	fped-09-658347	Completed	07:56:14	Thomas S	Kalaivani R	5	Maheswari D	2021-03-30 08:43:46	2021-03-30 08:46:40																												30-Mar-2021		30-Mar-2021
1	2021-03-30	frym-09-569850	Completed	07:56:53	Sathya R	Vignesh V	3	Nathiya S	2021-03-30 09:53:01	2021-03-30 10:01:38																												30-Mar-2021		30-Mar-2021
1	2021-03-30	fmed-08-641633	Completed	08:02:26	Gowthami L	Janani K	3	Maheswari D	2021-03-30 08:04:15	2021-03-30 08:27:34																												30-Mar-2021		30-Mar-2021
1	2021-03-30	fnut-08-623698	Completed	08:07:07	Muthulakshmi R	Aswini M	2	Usha Nandhini S	2021-03-30 08:19:00	2021-03-30 08:23:12																												30-Mar-2021		30-Mar-2021
1	2021-03-30	fmed-08-649402	Completed	08:41:19	Gowthami L	Sridhar G	5	Gowtham M	2021-03-30 11:33:41	2021-03-30 11:41:36																												30-Mar-2021		30-Mar-2021
1	2021-03-30	fceng-03-631397	Completed	08:44:47	Sathya R	SenthilKumar P	5	Maheswari D	2021-03-30 10:09:14	2021-03-30 10:17:31																												30-Mar-2021		30-Mar-2021
1	2021-03-30	fpsyt-12-650759	Completed	08:50:11	Prakash A	Sridhar G	6	Usha Nandhini S	2021-03-30 09:02:15	2021-03-30 09:07:45																												30-Mar-2021		30-Mar-2021
1	2021-03-30	fpsyg-12-586713	Completed	08:54:48	Uma Y	Nathiya S	7	Usha Nandhini S	2021-03-30 09:15:19	2021-03-30 09:29:31																												30-Mar-2021		30-Mar-2021
1	2021-03-30	fvets-08-656814	Completed	08:54:56	Dinesh Kumar M	Kalaivani R	0	Usha Nandhini S	2021-03-30 09:08:32	2021-03-30 09:10:54																												30-Mar-2021		30-Mar-2021
1	2021-03-30	fncel-15-596953	Completed	08:56:14	Sathya R	Saravanavel Murugan P	3	Maheswari D	2021-03-30 10:01:21	2021-03-30 10:08:39																												30-Mar-2021		30-Mar-2021
1	2021-03-30	fmed-08-626580	Completed	09:22:44	Sathya R	Saravanavel Murugan P	3	Maheswari D	2021-03-30 09:56:48	2021-03-30 10:01:06																												30-Mar-2021		30-Mar-2021
1	2021-03-30	fpsyt-12-656822	Completed	09:25:50	Siva Sankar Narayanan M	Gopala Krishnan R	1	Usha Nandhini S	2021-03-30 09:30:00	2021-03-30 09:31:54																												30-Mar-2021		30-Mar-2021
1	2021-03-30	fphy-09-643602	Completed	09:30:18	Prakash A	Saravanavel Murugan P	4	Usha Nandhini S	2021-03-30 09:32:24	2021-03-30 09:36:28																												30-Mar-2021		30-Mar-2021
1	2021-03-30	fcvm-08-636718	Completed	09:36:08	Ajith L	Kalaivani R	4	Usha Nandhini S	2021-03-30 09:36:56	2021-03-30 09:42:01																												30-Mar-2021		30-Mar-2021
1	2021-03-30	fclim-03-602962	Completed	09:36:26	Renganath K	Punniyamoorthy K	10	Maheswari D	2021-03-30 11:39:12	2021-03-30 12:09:36																												30-Mar-2021		30-Mar-2021
1	2021-03-30	fclim-03-580556	Completed	09:38:41	Dinesh Kumar M	Aswini M	2	Usha Nandhini S	2021-03-30 09:42:40	2021-03-30 09:48:13																												30-Mar-2021		30-Mar-2021
1	2021-03-30	fmed-08-649263	Completed	09:41:04	Gowthami L	Sarbudeen P	3	Gowtham M	2021-03-30 11:41:42	2021-03-30 11:50:39																												30-Mar-2021		30-Mar-2021
1	2021-03-30	fcomm-06-610807	Completed	09:54:50	Sathya R	Aswini M	3	Maheswari D	2021-03-30 10:17:44	2021-03-30 10:26:15																												30-Mar-2021		30-Mar-2021
1	2021-03-30	fagro-03-664034	Completed	10:08:52	Prakash A	Sridhar G	2	Usha Nandhini S	2021-03-30 10:14:22	2021-03-30 10:19:31																												30-Mar-2021		30-Mar-2021
1	2021-03-30	fpsyg-12-621454	Completed	10:28:20	Buvanenthiran P	Aswini M	2	Gowtham M	2021-03-30 12:04:58	2021-03-30 12:16:36																												30-Mar-2021		30-Mar-2021
1	2021-03-30	fimmu-12-653464	Completed	10:29:25	Siva Sankar Narayanan M	Durga B	5	Gowtham M	2021-03-30 11:16:56	2021-03-30 11:26:13																												30-Mar-2021		30-Mar-2021
1	2021-03-30	fmed-08-647494	Completed	10:30:09	Gowthami L	Sarbudeen P	5	Gowtham M	2021-03-30 11:50:45	2021-03-30 12:01:35																												30-Mar-2021		30-Mar-2021
1	2021-03-30	fped-09-584736	Completed	10:31:58	Priyadharshini S	Saravanavel Murugan P	2	Gowtham M	2021-03-30 11:07:28	2021-03-30 11:12:17																												30-Mar-2021		30-Mar-2021
1	2021-03-30	fcvm-08-655869	Completed	10:32:58	Uma Y	Nathiya S	10	Maheswari D	2021-03-30 12:09:55	2021-03-30 12:32:31																												30-Mar-2021		30-Mar-2021
1	2021-03-30	fpsyt-12-633730	Completed	10:33:44	Priyadharshini S	Saravanavel Murugan P	2	Gowtham M	2021-03-30 11:12:23	2021-03-30 11:15:46																												30-Mar-2021		30-Mar-2021
1	2021-03-30	fpsyt-12-646925	Completed	10:35:34	Prakash A	Saravanavel Murugan P	4	Usha Nandhini S	2021-03-30 10:43:13	2021-03-30 10:50:18																												30-Mar-2021		30-Mar-2021
1	2021-03-30	fenrg-09-664891	Completed	10:41:02	Manoj B	Sarbudeen P	3	Gowtham M	2021-03-30 13:55:01	2021-03-30 14:08:46																												30-Mar-2021		30-Mar-2021
1	2021-03-30	fncel-15-658972	Completed	10:46:51	Thomas S	Gopala Krishnan R	5	Usha Nandhini S	2021-03-30 10:55:45	2021-03-30 10:58:05																												30-Mar-2021		30-Mar-2021
1	2021-03-30	fneur-12-608491	Completed	10:49:16	Renganath K	Nathiya S	10	Maheswari D	2021-03-30 12:32:50	2021-03-30 12:44:03																												30-Mar-2021		30-Mar-2021
1	2021-03-30	fphy-09-675488	Completed	10:49:36	Dinesh Kumar M	SenthilKumar P	2	Usha Nandhini S	2021-03-30 10:50:59	2021-03-30 10:52:34																												30-Mar-2021		30-Mar-2021
1	2021-03-30	fnins-15-648354	Completed	10:54:15	Siva Sankar Narayanan M	Janani K	3	Gowtham M	2021-03-30 11:26:20	2021-03-30 11:31:03																												30-Mar-2021		30-Mar-2021
2	2021-03-30	fmed-08-652505	Completed	11:00:15	Manoj B	Sarbudeen P	3	Gowtham M	2021-03-30 14:48:59	2021-03-30 15:14:27	16:29:12	Manoj B	Sarbudeen P	1	Gowtham M	2021-03-30 16:31:38	2021-03-30 16:39:32																					30-Mar-2021		30-Mar-2021
1	2021-03-30	fspas-08-626398	Completed	11:02:17	Muthulakshmi R	Kalaivani R	3	Usha Nandhini S	2021-03-30 11:08:01	2021-03-30 11:39:17																												30-Mar-2021		30-Mar-2021
1	2021-03-30	fmed-08-578233	Completed	11:02:27	Ajith L	Sarbudeen P	1	Usha Nandhini S	2021-03-30 11:03:40	2021-03-30 11:07:15																												30-Mar-2021		30-Mar-2021
1	2021-03-30	fncom-15-616748	Completed	11:08:59	Thomas S	Gopala Krishnan R	5	Maheswari D	2021-03-30 12:54:51	2021-03-30 12:59:20																												30-Mar-2021		30-Mar-2021
1	2021-03-30	fpsyg-12-666382	Completed	11:25:03	Dinesh Kumar M	Sumithra P	2	Usha Nandhini S	2021-03-30 11:40:58	2021-03-30 11:44:41																												30-Mar-2021		30-Mar-2021
1	2021-03-30	fmed-08-635847	Completed	11:27:37	Ajith L	Muthu Kumar M	1	Usha Nandhini S	2021-03-30 11:45:10	2021-03-30 12:06:35																												30-Mar-2021		30-Mar-2021
2	2021-03-30	fpsyt-12-653674	Completed	11:30:44	Prakash A	Aswini M	4	Usha Nandhini S	2021-03-30 12:00:16		13:06:02	Prakash A	Muthu Kumar M	5	Usha Nandhini S	2021-03-30 13:43:40	2021-03-30 13:52:45																					30-Mar-2021		30-Mar-2021
1	2021-03-30	fpsyt-12-637861	Completed	11:48:12	Muthulakshmi R	Kalaivani R	3	Usha Nandhini S	2021-03-30 11:58:02	2021-03-30 11:59:56																												30-Mar-2021		30-Mar-2021
1	2021-03-30	fpubh-09-638964	Completed	11:51:36	Prakash A	Gopala Krishnan R	2	Usha Nandhini S	2021-03-30 11:54:26	2021-03-30 11:57:25																												30-Mar-2021		30-Mar-2021
1	2021-03-30	fpsyg-12-654336	Completed	11:54:40	Uma Y	Nathiya S	6	Maheswari D	2021-03-30 12:44:19	2021-03-30 12:54:35																												30-Mar-2021		30-Mar-2021
1	2021-03-30	fdgth-03-662811	Completed	11:58:34	Priyadharshini S	Kalaivani R	10	Gowtham M	2021-03-30 12:23:03	2021-03-30 12:31:55																												30-Mar-2021		30-Mar-2021
1	2021-03-30	fpsyt-12-632596	Completed	12:00:10	Buvanenthiran P	Muthu Kumar M	2	Gowtham M	2021-03-30 12:17:12	2021-03-30 12:22:52																												30-Mar-2021		30-Mar-2021
2	2021-03-30	fmed-08-654524	Completed	12:00:52	Ajith L	Durga B	12	Usha Nandhini S	2021-03-30 12:15:13	2021-03-30 12:59:07	13:47:28	Ajith L	Durga B	2	Usha Nandhini S	2021-03-30 13:54:04	2021-03-30 13:56:47																					30-Mar-2021		30-Mar-2021
1	2021-03-30	fmed-08-638306	Completed	12:02:02	Gowthami L	Sarbudeen P	5	Gowtham M	2021-03-30 12:50:25	2021-03-30 12:56:29																												30-Mar-2021		30-Mar-2021
1	2021-03-30	frvir-02-648575	Completed	12:11:44	Renganath K	Durga B	10	Maheswari D	2021-03-30 12:59:42	2021-03-30 13:04:11																												30-Mar-2021		30-Mar-2021
1	2021-03-30	fped-09-653230	Completed	12:13:17	Siva Sankar Narayanan M	Aswini M	5	Gowtham M	2021-03-30 12:32:54	2021-03-30 12:42:35																												30-Mar-2021		30-Mar-2021
1	2021-03-30	fcell-09-643942	Completed	12:23:17	Prakash A	Gopala Krishnan R	4	Usha Nandhini S	2021-03-30 13:00:24	2021-03-30 13:05:01																												30-Mar-2021		30-Mar-2021
1	2021-03-30	fneur-12-616497	Completed	12:30:42	Renganath K	Sarbudeen P	10	Maheswari D	2021-03-30 13:04:26	2021-03-30 13:07:08																												30-Mar-2021		30-Mar-2021
1	2021-03-30	fpsyt-12-643234	Completed	12:35:39	Buvanenthiran P	SenthilKumar P	2	Gowtham M	2021-03-30 12:43:13	2021-03-30 12:48:57																												30-Mar-2021		30-Mar-2021
1	2021-03-30	fnagi-13-628336	Completed	12:38:02	Ajith L	Sumithra P	1	Usha Nandhini S	2021-03-30 13:06:41	2021-03-30 13:07:11																												30-Mar-2021		30-Mar-2021
1	2021-03-30	fgene-12-668871	Completed	12:38:14	Manoj B	Sridhar G	2	Maheswari D	2021-03-30 13:07:19	2021-03-30 13:28:14																												30-Mar-2021		30-Mar-2021
1	2021-03-30	fpubh-09-583706	Completed	12:39:57	Uma Y	Nathiya S	12	Maheswari D	2021-03-30 13:10:15	2021-03-30 13:29:01																												30-Mar-2021		30-Mar-2021
1	2021-03-30	fcell-09-654447	Completed	12:41:07	Prakash A	Muthu Kumar M	5	Usha Nandhini S	2021-03-30 13:09:10	2021-03-30 13:14:35																												30-Mar-2021		30-Mar-2021
1	2021-03-30	fneur-12-633999	Completed	12:47:25	Renganath K	Gopala Krishnan R	10	Maheswari D	2021-03-30 13:29:10	2021-03-30 13:32:40																												30-Mar-2021		30-Mar-2021
1	2021-03-30	fgene-12-663557	Completed	12:50:36	Priyadharshini S	Aswini M	10	Gowtham M	2021-03-30 12:56:43	2021-03-30 13:07:30																												30-Mar-2021		30-Mar-2021
1	2021-03-30	fncom-15-617862	Completed	12:53:42	Muthulakshmi R	Kalaivani R	15	Usha Nandhini S	2021-03-30 13:15:08	2021-03-30 13:32:51																												30-Mar-2021		30-Mar-2021
1	2021-03-30	fneur-12-663722	Completed	12:56:39	Gowthami L	Kalaivani R	6	Maheswari D	2021-03-30 13:33:00	2021-03-30 13:51:46																												30-Mar-2021		30-Mar-2021
1	2021-03-30	fneur-12-636888	Completed	13:01:29	Renganath K	Sridhar G	10	Maheswari D	2021-03-30 13:52:02	2021-03-30 13:56:49																												30-Mar-2021		30-Mar-2021
1	2021-03-30	fncel-15-623552	Completed	13:03:06	Ajith L	Aswini M	7	Gowtham M	2021-03-30 13:13:34	2021-03-30 13:21:54																												30-Mar-2021		30-Mar-2021
1	2021-03-30	fnut-08-659646	Completed	13:13:47	Siva Sankar Narayanan M	Gopala Krishnan R	5	Gowtham M	2021-03-30 13:22:30	2021-03-30 13:29:31																												30-Mar-2021		30-Mar-2021
1	2021-03-30	fpsyg-12-622894	Completed	13:16:46	Muthulakshmi R	Kalaivani R	5	Usha Nandhini S	2021-03-30 13:39:33	2021-03-30 13:43:25																												30-Mar-2021		30-Mar-2021
1	2021-03-30	fneur-12-602037	Completed	13:30:05	Ajith L	Saravanavel Murugan P	1	Gowtham M	2021-03-30 13:32:55	2021-03-30 13:37:36																												30-Mar-2021		30-Mar-2021
1	2021-03-30	fimmu-12-638446	Completed	13:30:26	Dinesh Kumar M	Sridhar G	2	Usha Nandhini S	2021-03-30 13:33:36	2021-03-30 13:37:48																												30-Mar-2021		30-Mar-2021
1	2021-03-30	fcvm-08-647118	Completed	13:36:26	Gowthami L	Gopala Krishnan R	5	Gowtham M	2021-03-30 13:39:28	2021-03-30 13:48:50																												30-Mar-2021		30-Mar-2021
1	2021-03-30	fpsyg-12-576810	Completed	13:39:35	Uma Y	Kalaivani R	7	Maheswari D	2021-03-30 13:56:59	2021-03-30 14:15:09																												30-Mar-2021		30-Mar-2021
1	2021-03-30	fclim-03-575900	Completed	13:45:33	Buvanenthiran P	Nathiya S	6	Santhosh Kumar L	2021-03-30 14:20:52	2021-03-30 14:30:21																												30-Mar-2021		30-Mar-2021
1	2021-03-30	fnhum-15-623315	Completed	13:58:30	Priyadharshini S	Kalaivani R	10	Gowtham M	2021-03-30 14:09:14	2021-03-30 14:48:39																												30-Mar-2021		30-Mar-2021
1	2021-03-30	fspor-03-653291	Completed	14:00:18	Siva Sankar Narayanan M	Sumithra P	5	Santhosh Kumar L	2021-03-30 14:30:28	2021-03-30 14:35:07																												30-Mar-2021		30-Mar-2021
1	2021-03-30	fneur-12-586735	Completed	14:43:56	Thomas S	Kalaivani R	5	Maheswari D	2021-03-30 15:34:34	2021-03-30 15:42:38																												30-Mar-2021		30-Mar-2021
2	2021-03-30	fphys-12-651732	Completed	14:55:22	Manoj B	Durga B	3	Gowtham M	2021-03-30 15:27:14	2021-03-30 15:37:39	16:37:59	Manoj B	Durga B	1	Gowtham M	2021-03-30 16:39:50	2021-03-30 16:40:20																					30-Mar-2021		30-Mar-2021
1	2021-03-30	fpsyt-12-602976	Completed	15:03:34	Devilakshmi R	Vignesh V	4	Gowtham M	2021-03-30 15:37:59	2021-03-30 15:44:45																												30-Mar-2021		30-Mar-2021
1	2021-03-30	fpsyg-12-655497	Completed	15:09:30	Ajith L	Durga B	3	Usha Nandhini S	2021-03-30 15:14:23	2021-03-30 15:27:45																												30-Mar-2021		30-Mar-2021
1	2021-03-30	fvets-08-623823	Completed	15:09:50	Buvanenthiran P	Saravanavel Murugan P	4	Santhosh Kumar L	2021-03-30 15:12:51	2021-03-30 15:18:18																												30-Mar-2021		30-Mar-2021
1	2021-03-30	fpubh-09-643640	Completed	15:10:21	Jeyaseelan R	Aswini M	7	Gowtham M	2021-03-30 15:45:00	2021-03-30 16:00:07																												30-Mar-2021		30-Mar-2021
1	2021-03-30	fnins-15-671900	Completed	15:26:53	Renganath K	Aswini M	5	Maheswari D	2021-03-30 15:47:06	2021-03-30 15:52:53																												30-Mar-2021		30-Mar-2021
1	2021-03-30	frym-09-572765	Completed	15:30:11	Sathya R	Nathiya S	3	Gowtham M	2021-03-30 16:00:28	2021-03-30 17:15:26																												30-Mar-2021		30-Mar-2021
1	2021-03-30	fpsyt-12-607718	Completed	15:35:08	Amshaveni N	Gopala Krishnan R	5	Maheswari D	2021-03-30 15:53:54	2021-03-30 16:20:48																												30-Mar-2021		30-Mar-2021
1	2021-03-30	fchem-09-662533	Completed	15:37:38	Prakash A	Durga B	5	Usha Nandhini S	2021-03-30 15:40:41	2021-03-30 15:50:28																												30-Mar-2021		30-Mar-2021
1	2021-03-30	fnrgo-02-654597	Completed	15:48:47	Renganath K	Aswini M	10	Maheswari D	2021-03-30 16:21:01	2021-03-30 16:25:46																												30-Mar-2021		30-Mar-2021
1	2021-03-30	fsufs-05-554373	Completed	15:51:29	Siva Sankar Narayanan M	Aswini M	5	Santhosh Kumar L	2021-03-30 15:52:58	2021-03-30 15:59:02																												30-Mar-2021		30-Mar-2021
1	2021-03-30	fbioe-09-659431	Completed	15:57:10	Mahalingam K	Aswini M	9	Santhosh Kumar L	2021-03-30 15:59:15	2021-03-30 16:01:49																												30-Mar-2021		30-Mar-2021
1	2021-03-30	fnut-08-649189	Completed	15:57:10	Gowrishankar S	Kalaivani R	9	Santhosh Kumar L	2021-03-30 16:01:57	2021-03-30 16:07:14																												30-Mar-2021		30-Mar-2021
1	2021-03-30	fneur-12-639353	Completed	16:11:43	Thomas S	Muthu Kumar M	5	Maheswari D	2021-03-30 16:42:14	2021-03-30 16:52:42																												30-Mar-2021		30-Mar-2021
1	2021-03-30	fpsyg-12-646090	Completed	16:15:15	Mohan R	Durga B	2	Santhosh Kumar L	2021-03-30 16:16:01	2021-03-30 16:18:06																												30-Mar-2021		30-Mar-2021
2	2021-03-30	fpsyt-12-642469	Completed	16:15:46	Ajith L	Vignesh V	18	Usha Nandhini S	2021-03-30 16:23:36	2021-03-30 16:50:50	17:11:16	Ajith L	Vignesh V	1	Usha Nandhini S	2021-03-30 17:14:41	2021-03-30 17:17:22																					30-Mar-2021		30-Mar-2021
1	2021-03-30	fnut-08-648973	Completed	16:21:29	Sathya R	Janani M	5	Gowtham M	2021-03-30 16:40:39	2021-03-30 16:47:38																												30-Mar-2021		30-Mar-2021
1	2021-03-30	fnut-08-603936	Completed	16:23:49	Renganath K	Divya A	10	Maheswari D	2021-03-30 16:25:57	2021-03-30 16:41:41																												30-Mar-2021		30-Mar-2021
1	2021-03-30	fcomm-06-610920	Completed	16:35:00	Prakash A	Aswini M	5	Usha Nandhini S	2021-03-30 18:07:51	2021-03-30 18:08:17																												30-Mar-2021		30-Mar-2021
1	2021-03-30	froh-02-656558	Completed	16:45:01	Jeyaseelan R	Sumithra P	2	Gowtham M	2021-03-30 17:16:52	2021-03-30 17:36:43																												30-Mar-2021		30-Mar-2021
2	2021-03-30	fphy-09-650537	Completed	16:50:34	Gowthami L	Divya A	6	Maheswari D	2021-03-30 16:52:51	2021-03-30 17:30:13	18:28:23	Gowthami L	Nathiya S	3	Maheswari D	2021-03-30 18:43:28	2021-03-30 18:43:34																					30-Mar-2021		30-Mar-2021
1	2021-03-30	fpubh-09-618962	Completed	16:54:55	Dinesh Kumar M	Saravanavel Murugan P	2	Usha Nandhini S	2021-03-30 17:29:01	2021-03-30 17:34:49																												30-Mar-2021		30-Mar-2021
1	2021-03-30	fenrg-09-656006	Completed	16:57:58	Prakash A	Durga B	4	Usha Nandhini S	2021-03-30 17:39:45	2021-03-30 17:44:09																												30-Mar-2021		30-Mar-2021
1	2021-03-30	fclim-03-636657	Completed	17:00:17	Mahalingam K	Divya A	11	Santhosh Kumar L	2021-03-30 17:01:25	2021-03-30 17:05:12																												30-Mar-2021		30-Mar-2021
1	2021-03-30	fpubh-09-589244	Completed	17:01:10	Ajith L	Divya A	6	Usha Nandhini S	2021-03-30 17:17:36	2021-03-30 17:28:53																												30-Mar-2021		30-Mar-2021
1	2021-03-30	fvets-08-644836	Completed	17:03:55	Amshaveni N	Sridhar G	6	Maheswari D	2021-03-30 17:30:29	2021-03-30 17:37:15																												30-Mar-2021		30-Mar-2021
1	2021-03-30	fonc-11-639980	Completed	17:07:32	Muthulakshmi R	Saravanavel Murugan P	6	Usha Nandhini S	2021-03-30 17:12:08	2021-03-30 17:12:15																												30-Mar-2021		30-Mar-2021
1	2021-03-30	fbloc-04-506436	Completed	17:07:57	Dinesh Kumar M	Kalaivani R	2	Usha Nandhini S	2021-03-30 17:45:52	2021-03-30 17:52:05																												30-Mar-2021		30-Mar-2021
1	2021-03-30	frsus-02-656818	Completed	17:08:34	Priyadharshini S	Aswini M	10	Gowtham M	2021-03-30 17:57:59	2021-03-30 18:05:05																												30-Mar-2021		30-Mar-2021
1	2021-03-30	falgy-02-642788	Completed	17:14:40	Mohan R	Nathiya S	5	Santhosh Kumar L	2021-03-30 17:17:32	2021-03-30 17:47:10																												30-Mar-2021		30-Mar-2021
1	2021-03-30	frvir-02-658561	Completed	17:26:30	Dinesh Kumar M	Janani K	2	Usha Nandhini S	2021-03-30 18:08:28	2021-03-30 18:19:47																												30-Mar-2021		30-Mar-2021
1	2021-03-30	fpsyt-12-638981	Completed	17:27:01	Devilakshmi R	SenthilKumar P	6	Gowtham M	2021-03-30 17:50:06	2021-03-30 17:57:28																												30-Mar-2021		30-Mar-2021
2	2021-03-30	fgene-12-657182	Completed	17:31:01	Prakash A	Divya A	4	Usha Nandhini S	2021-03-30 17:35:37	2021-03-30 17:38:52	17:39:53	Prakash A	Divya A	3	Usha Nandhini S	2021-03-30 17:45:01	2021-03-30 17:45:38																					30-Mar-2021		30-Mar-2021
1	2021-03-30	fvets-08-644224	Completed	17:33:05	Priyadharshini S	Vignesh V	10	Gowtham M	2021-03-30 18:05:16	2021-03-30 18:12:21																												30-Mar-2021		30-Mar-2021
1	2021-03-30	fcell-09-620248	Completed	17:37:30	Gowrishankar S	Gopala Krishnan R	6	Santhosh Kumar L	2021-03-30 17:47:19	2021-03-30 17:50:38																												30-Mar-2021		30-Mar-2021
1	2021-03-30	fcomm-06-628780	Completed	17:37:38	Buvanenthiran P	Sridhar G	4	Santhosh Kumar L	2021-03-30 17:50:46	2021-03-30 18:00:04																												30-Mar-2021		30-Mar-2021
1	2021-03-30	fmed-08-639758	Completed	17:38:47	Gowthami L	Kalaivani R	5	Maheswari D	2021-03-30 17:48:08	2021-03-30 17:55:31																												30-Mar-2021		30-Mar-2021
1	2021-03-30	fpubh-09-640352	Completed	17:41:01	Sathya R	Sridhar G	5	Gowtham M	2021-03-30 18:34:40	2021-03-30 18:45:47																												30-Mar-2021		30-Mar-2021
1	2021-03-30	fped-09-661698	Completed	17:45:37	Thomas S	Sumithra P	5	Maheswari D	2021-03-30 17:55:44	2021-03-30 18:01:59																												30-Mar-2021		30-Mar-2021
1	2021-03-30	fnbot-15-664062	Completed	17:56:07	Thomas S	Sumithra P	5	Maheswari D	2021-03-30 18:02:11	2021-03-30 18:04:50																												30-Mar-2021		30-Mar-2021
1	2021-03-30	fchem-09-661143	Completed	17:59:18	Amshaveni N	Aswini M	6	Maheswari D	2021-03-30 18:05:01	2021-03-30 18:13:49																												30-Mar-2021		30-Mar-2021
1	2021-03-30	fvets-08-657381	Completed	18:04:21	Priyadharshini S	Janani M	10	Gowtham M	2021-03-30 18:12:27	2021-03-30 18:28:58																												30-Mar-2021		30-Mar-2021
1	2021-03-30	fcvm-08-608008	Completed	18:05:44	Mahalingam K	Janani M	7	Santhosh Kumar L	2021-03-30 18:29:56	2021-03-30 18:33:10																												30-Mar-2021		30-Mar-2021
1	2021-03-30	fpsyg-12-650286	Completed	18:05:54	Siva Sankar Narayanan M	SenthilKumar P	10	Santhosh Kumar L	2021-03-30 18:19:03	2021-03-30 18:29:43																												30-Mar-2021		30-Mar-2021
1	2021-03-30	fpubh-09-643807	Completed	18:10:29	Sathya R	Vignesh V	5	Gowtham M	2021-03-30 18:45:55	2021-03-30 18:52:28																												30-Mar-2021		30-Mar-2021
1	2021-03-30	fpsyt-12-659401	Completed	18:15:42	Jeyaseelan R	Kalaivani R	4	Gowtham M	2021-03-30 19:19:41	2021-03-30 20:00:11																												30-Mar-2021		30-Mar-2021
1	2021-03-30	fneur-12-627824	Completed	18:17:25	Gowthami L	Nathiya S	5	Maheswari D	2021-03-30 18:21:55	2021-03-30 18:37:15																												30-Mar-2021		30-Mar-2021
1	2021-03-30	frai-04-644062	Completed	18:26:53	Mohan R	Sridhar G	2	Santhosh Kumar L	2021-03-30 18:33:27	2021-03-30 18:38:39																												30-Mar-2021		30-Mar-2021
1	2021-03-30	fneur-12-601131	Completed	18:29:20	Buvanenthiran P	Sumithra P	4	Santhosh Kumar L	2021-03-30 18:58:59	2021-03-30 19:09:21																												30-Mar-2021		30-Mar-2021
1	2021-03-30	fneur-12-656752	Completed	18:31:58	Siva Sankar Narayanan M	Muthu Kumar M	5	Santhosh Kumar L	2021-03-30 19:09:41	2021-03-30 19:12:19																												30-Mar-2021		30-Mar-2021
1	2021-03-30	fmicb-12-672517	Completed	18:36:22	Sathya R	Janani K	5	Gowtham M	2021-03-30 18:52:34	2021-03-30 18:56:54																												30-Mar-2021		30-Mar-2021
1	2021-03-30	fpsyt-12-657021	Completed	18:39:51	Gowrishankar S	Muthu Kumar M	5	Santhosh Kumar L	2021-03-30 19:12:33	2021-03-30 19:15:32																												30-Mar-2021		30-Mar-2021
1	2021-03-30	fpsyt-12-632031	Completed	18:46:38	Priyadharshini S	Divya A	10	Gowtham M	2021-03-30 21:15:34	2021-03-30 21:23:20																												30-Mar-2021		30-Mar-2021
1	2021-03-30	fnut-08-640100	Completed	18:47:47	Thomas S	Janani M	5	Maheswari D	2021-03-30 18:48:33	2021-03-30 18:53:53																												30-Mar-2021		30-Mar-2021
1	2021-03-30	fvets-07-617024	Completed	18:48:37	Sathya R	SenthilKumar P	2	Gowtham M	2021-03-30 18:57:04	2021-03-30 19:18:54																												30-Mar-2021		30-Mar-2021
1	2021-03-30	fped-09-620158	Completed	18:59:10	Thomas S	Sarbudeen P	5	Maheswari D	2021-03-30 19:03:31	2021-03-30 19:03:39																												30-Mar-2021		30-Mar-2021
1	2021-03-30	fnut-08-663229	Completed	19:01:20	Siva Sankar Narayanan M	Sumithra P	5	Santhosh Kumar L	2021-03-30 19:16:08	2021-03-30 19:19:47																												30-Mar-2021		30-Mar-2021
1	2021-03-30	fpsyg-12-643277	Completed	19:03:20	Devilakshmi R	Sumithra P	2	Santhosh Kumar L	2021-03-30 21:12:58	2021-03-30 21:14:05																												30-Mar-2021		30-Mar-2021
1	2021-03-30	fneur-12-641024	Completed	19:10:16	Mohan R	Janani M	3	Santhosh Kumar L	2021-03-30 19:19:56	2021-03-30 19:22:47																												30-Mar-2021		30-Mar-2021
1	2021-03-30	fphys-12-653492	Completed	19:13:23	Priyadharshini S	Muthu Kumar M	10	Gowtham M	2021-03-30 21:35:39	2021-03-30 21:51:16																												30-Mar-2021		30-Mar-2021
1	2021-03-30	fped-09-601782	Completed	19:15:42	Buvanenthiran P	Durga B	4	Santhosh Kumar L	2021-03-30 19:23:01	2021-03-30 19:27:12																												30-Mar-2021		30-Mar-2021
1	2021-03-30	fped-09-625011	Completed	19:31:33	Sathya R	Janani K	5	Gowtham M	2021-03-30 20:50:24	2021-03-30 21:14:28																												30-Mar-2021		30-Mar-2021
1	2021-03-30	fdgth-03-611813	Completed	19:32:50	Mahalingam K	Janani M	11	Santhosh Kumar L	2021-03-30 19:41:18	2021-03-30 19:48:03																												30-Mar-2021		30-Mar-2021
1	2021-03-30	fneur-12-651511	Completed	19:42:25	Mohan R	Divya A	1	Santhosh Kumar L	2021-03-30 19:48:11	2021-03-30 19:49:20																												30-Mar-2021		30-Mar-2021
1	2021-03-30	fped-09-656939	Completed	19:44:26	Buvanenthiran P	Gopala Krishnan R	5	Santhosh Kumar L	2021-03-30 19:49:28	2021-03-30 19:53:19																												30-Mar-2021		30-Mar-2021
1	2021-03-30	fmed-08-631642	Completed	19:44:40	Siva Sankar Narayanan M	Kalaivani R	5	Santhosh Kumar L	2021-03-30 19:53:43	2021-03-30 20:05:10																												30-Mar-2021		30-Mar-2021
1	2021-03-30	frvir-02-644683	Completed	19:52:14	Jeyaseelan R	Saravanavel Murugan P	5	Gowtham M	2021-03-30 20:00:41	2021-03-30 20:26:52																												30-Mar-2021		30-Mar-2021
1	2021-03-30	fpubh-09-571110	Completed	20:02:16	Gowrishankar S	Divya A	15	Santhosh Kumar L	2021-03-30 20:05:16	2021-03-30 20:13:05																												30-Mar-2021		30-Mar-2021
1	2021-03-30	fneur-12-669922	Completed	20:04:50	Mohan R	SenthilKumar P	2	Santhosh Kumar L	2021-03-30 20:13:14	2021-03-30 20:33:49																												30-Mar-2021		30-Mar-2021
2	2021-03-30	fpsyg-12-642966	Completed	20:16:35	Priyadharshini S	Saravanavel Murugan P	10				20:27:38	Priyadharshini S	Saravanavel Murugan P	10	Gowtham M	2021-03-30 21:51:38	2021-03-30 21:59:31																					30-Mar-2021		00-Jan-1900
1	2021-03-30	fbioe-09-674507	Completed	20:24:32	Mohan R	Gopala Krishnan R	1	Santhosh Kumar L	2021-03-30 20:33:55	2021-03-30 20:35:43																												30-Mar-2021		30-Mar-2021
1	2021-03-30	fgene-12-619056	Completed	20:34:46	Mahalingam K	Muthu Kumar M	7	Santhosh Kumar L	2021-03-30 20:36:57	2021-03-30 20:38:32																												30-Mar-2021		30-Mar-2021
1	2021-03-30	fpubh-09-666333	Completed	20:35:02	Gowrishankar S	Janani K	4	Santhosh Kumar L	2021-03-30 20:38:53	2021-03-30 20:41:53																												30-Mar-2021		30-Mar-2021
1	2021-03-30	fsufs-05-649613	Completed	20:36:12	Buvanenthiran P	Janani M	3	Santhosh Kumar L	2021-03-30 20:42:05	2021-03-30 20:56:10																												30-Mar-2021		30-Mar-2021
1	2021-03-30	fneur-12-647296	Completed	21:15:41	Jeyaseelan R	Sumithra P	4	Gowtham M	2021-03-30 21:23:31	2021-03-30 21:35:23																												30-Mar-2021		30-Mar-2021
1	2021-03-30	fvets-08-572012	Completed	21:17:26	Buvanenthiran P	Janani M	3	Santhosh Kumar L	2021-03-30 21:19:36	2021-03-30 21:25:13																												30-Mar-2021		30-Mar-2021
1	2021-03-30	fnbeh-15-632906	Completed	21:42:47	Priyadharshini S	SenthilKumar P	20	Gowtham M	2021-03-30 21:59:37	2021-03-30 22:15:52																												30-Mar-2021		30-Mar-2021
1	2021-03-30	fpls-12-675510	Completed	21:47:07	Gowrishankar S	Nathiya S	4	Santhosh Kumar L	2021-03-30 21:47:27	2021-03-30 21:53:51																												30-Mar-2021		30-Mar-2021
1	2021-03-30	fams-07-674785	Completed	21:58:56	Mohan R	Gopala Krishnan R	1	Santhosh Kumar L	2021-03-30 22:01:10	2021-03-30 22:01:15																												30-Mar-2021		30-Mar-2021
1	2021-03-30	fped-09-666040	Completed	22:32:22	Mahalingam K	Aswini M	7	Santhosh Kumar L	2021-03-30 22:52:18	2021-03-30 23:00:14																												30-Mar-2021		30-Mar-2021
1	2021-03-30	fpsyt-12-572755	Completed	22:44:08	Buvanenthiran P	Muthu Kumar M	5	Santhosh Kumar L	2021-03-30 23:00:21	2021-03-31 00:59:23																												30-Mar-2021		30-Mar-2021
1	2021-03-30	fpsyg-12-651423	Completed	23:01:09	Gowrishankar S	Aswini M	7	Santhosh Kumar L	2021-03-30 23:20:47	2021-03-30 23:23:35																												30-Mar-2021		30-Mar-2021
1	2021-03-30	fpubh-09-650018	Completed	23:21:21	Mahalingam K	Aswini M	11	Santhosh Kumar L	2021-03-30 23:24:38	2021-03-30 23:27:36																												30-Mar-2021		30-Mar-2021
1	2021-03-30	fsufs-05-629684	Completed	23:38:10	Gowrishankar S	Divya A	5	Santhosh Kumar L	2021-03-30 23:47:39	2021-03-30 23:50:20																												30-Mar-2021		30-Mar-2021
1	2021-03-30	fnbot-15-636864	Completed	23:38:20	Buvanenthiran P	Muthu Kumar M	2	Santhosh Kumar L	2021-03-30 23:50:28	2021-03-30 23:51:46																												30-Mar-2021		30-Mar-2021
1	2021-03-30	fmars-08-665582	Completed	23:52:44	Mahalingam K	Aswini M	9	Santhosh Kumar L	2021-03-30 23:56:25	2021-03-30 23:58:31																												30-Mar-2021		30-Mar-2021
1	2021-03-31	fneur-12-610658	Completed	00:04:12	Buvanenthiran P	Sridhar G	3	Santhosh Kumar L	2021-03-31 00:06:08	2021-03-31 00:07:47																												31-Mar-2021		31-Mar-2021
1	2021-03-31	fcosc-02-653056	Completed	00:16:07	Gowrishankar S	Janani K	9	Santhosh Kumar L	2021-03-31 00:17:10	2021-03-31 00:23:59																												31-Mar-2021		31-Mar-2021
1	2021-03-31	fmats-08-664220	Completed	00:29:08	Mahalingam K	Aswini M	7	Santhosh Kumar L	2021-03-31 00:31:47	2021-03-31 00:33:55																												31-Mar-2021		31-Mar-2021
1	2021-03-31	fneur-12-660909	Completed	00:38:17	Buvanenthiran P	Sumithra P	5	Santhosh Kumar L	2021-03-31 00:40:20	2021-03-31 00:42:56																												31-Mar-2021		31-Mar-2021
1	2021-03-31	fcvm-08-647071	Completed	00:47:53	Gowrishankar S	Sarbudeen P	6	Santhosh Kumar L	2021-03-31 00:49:02	2021-03-31 00:53:51																												31-Mar-2021		31-Mar-2021
1	2021-03-31	fpls-12-650582	Completed	06:23:32	Ajith L	Divya A	1	Usha Nandhini S	2021-03-31 07:10:21	2021-03-31 07:12:19																												31-Mar-2021		31-Mar-2021
1	2021-03-31	fmars-08-658384	Completed	06:40:24	Ajith L	Divya A	1	Usha Nandhini S	2021-03-31 07:12:33	2021-03-31 07:16:27																												31-Mar-2021		31-Mar-2021
1	2021-03-31	fpsyg-12-576346	Completed	07:20:19	Thomas S	Janani M	5	Maheswari D	2021-03-31 07:22:28	2021-03-31 07:47:37																												31-Mar-2021		31-Mar-2021
1	2021-03-31	fnsyn-13-660718	Completed	07:49:18	Ajith L	Sridhar G	10	Usha Nandhini S	2021-03-31 07:49:38	2021-03-31 08:00:34																												31-Mar-2021		31-Mar-2021
1	2021-03-31	fimmu-12-642958	Completed	07:58:55	Uma Y	Durga B	8	Maheswari D	2021-03-31 08:03:29	2021-03-31 08:31:07																												31-Mar-2021		31-Mar-2021
1	2021-03-31	fcvm-08-649512	Completed	08:03:32	Muthulakshmi R	Yogadharshni U	8	Usha Nandhini S	2021-03-31 08:12:16	2021-03-31 08:26:14																												31-Mar-2021		31-Mar-2021
1	2021-03-31	fphys-12-662739	Completed	08:11:53	Ajith L	Kalaivani R	2	Usha Nandhini S	2021-03-31 08:26:34	2021-03-31 08:32:34																												31-Mar-2021		31-Mar-2021
1	2021-03-31	fspor-03-635977	Completed	08:39:38	Gowthami L	Gopala Krishnan R	8	Maheswari D	2021-03-31 09:28:59	2021-03-31 09:53:33																												31-Mar-2021		31-Mar-2021
2	2021-03-31	fpsyg-12-611355	Completed	08:52:49	Muthulakshmi R	Yogadharshni U	8	Usha Nandhini S	2021-03-31 08:54:22	2021-03-31 09:04:24	12:07:11	Muthulakshmi R	Yogadharshni U	1	Usha Nandhini S	2021-03-31 12:27:40	2021-03-31 12:31:49																					31-Mar-2021		31-Mar-2021
1	2021-03-31	fpsyg-12-648667	Completed	09:04:11	Dinesh Kumar M	SenthilKumar P	2	Usha Nandhini S	2021-03-31 09:04:35	2021-03-31 09:11:37																												31-Mar-2021		31-Mar-2021
2	2021-03-31	fneur-12-658451	Completed	09:06:23	Gowthami L	Durga B	6	Maheswari D	2021-03-31 09:53:42	2021-03-31 10:07:22	10:59:36	Gowthami L	SenthilKumar P	5	Maheswari D	2021-03-31 11:08:11	2021-03-31 11:26:18																					31-Mar-2021		31-Mar-2021
1	2021-03-31	fpsyg-12-615209	Completed	09:22:44	Uma Y	Durga B	10	Maheswari D	2021-03-31 10:07:33	2021-03-31 11:07:57																												31-Mar-2021		31-Mar-2021
1	2021-03-31	fneur-12-632672	Completed	09:24:31	Dinesh Kumar M	Gopala Krishnan R	0	Usha Nandhini S	2021-03-31 09:30:31	2021-03-31 09:34:36																												31-Mar-2021		31-Mar-2021
1	2021-03-31	fpsyg-12-587923	Completed	09:24:43	Ajith L	Aswini M	8	Usha Nandhini S	2021-03-31 09:34:43	2021-03-31 09:54:54																												31-Mar-2021		31-Mar-2021
1	2021-03-31	fpubh-09-616750	Completed	09:37:12	Dinesh Kumar M	Muthu Kumar M	2	Usha Nandhini S	2021-03-31 09:55:27	2021-03-31 10:02:42																												31-Mar-2021		31-Mar-2021
2	2021-03-31	fpubh-09-599280	Completed	09:40:02	Gowthami L	Divya A	6	Usha Nandhini S	2021-03-31 11:24:39	2021-03-31 11:31:21	14:31:50	Gowthami L	Durga B	2	Usha Nandhini S	2021-03-31 14:36:17	2021-03-31 14:40:02																					31-Mar-2021		31-Mar-2021
1	2021-03-31	fpsyg-12-634978	Completed	09:58:40	Ajith L	Aswini M	8	Usha Nandhini S	2021-03-31 10:03:08	2021-03-31 10:14:45																												31-Mar-2021		31-Mar-2021
1	2021-03-31	fpsyt-12-638359	Completed	09:59:58	Dinesh Kumar M	Nathiya S	2	Usha Nandhini S	2021-03-31 10:16:03	2021-03-31 10:20:17																												31-Mar-2021		31-Mar-2021
1	2021-03-31	fneur-12-650530	Completed	10:23:23	Uma Y	Durga B	10	Usha Nandhini S	2021-03-31 11:02:48	2021-03-31 11:20:50																												31-Mar-2021		31-Mar-2021
2	2021-03-31	fgeed-03-654996	Completed	10:28:35	Muthulakshmi R	Yogadharshni U	7	Usha Nandhini S	2021-03-31 10:31:20	2021-03-31 10:42:39	12:18:43	Muthulakshmi R	Kalaivani R	3	Usha Nandhini S	2021-03-31 12:32:16	2021-03-31 12:35:35																					31-Mar-2021		31-Mar-2021
1	2021-03-31	fpsyg-12-643177	Completed	10:29:36	Ajith L	Muthu Kumar M	2	Usha Nandhini S	2021-03-31 10:42:56	2021-03-31 10:48:49																												31-Mar-2021		31-Mar-2021
2	2021-03-31	fspor-03-660291	Completed	10:39:53	Gowthami L	SenthilKumar P	6	Maheswari D	2021-03-31 11:27:01	2021-03-31 11:34:33	14:36:15	Gowthami L	Durga B	1	Maheswari D	2021-03-31 14:42:43	2021-03-31 14:47:49																					31-Mar-2021		31-Mar-2021
1	2021-03-31	fsufs-05-613269	Completed	10:43:56	Sathya R	Janani K	5	Maheswari D	2021-03-31 11:47:57	2021-03-31 11:52:24																												31-Mar-2021		31-Mar-2021
1	2021-03-31	fnut-08-644650	Completed	10:46:54	Dinesh Kumar M	Divya A	0	Usha Nandhini S	2021-03-31 10:49:04	2021-03-31 10:57:17																												31-Mar-2021		31-Mar-2021
1	2021-03-31	fsurg-08-646811	Completed	10:47:14	Manoj B	Janani K	3	Santhosh Kumar L	2021-03-31 14:20:30	2021-03-31 14:22:48																												31-Mar-2021		31-Mar-2021
1	2021-03-31	fpubh-09-651144	Completed	10:53:31	Sathya R	SenthilKumar P	3	Maheswari D	2021-03-31 12:06:52	2021-03-31 12:10:24																												31-Mar-2021		31-Mar-2021
1	2021-03-31	fmolb-08-609979	Completed	10:54:18	Prakash A	Kalaivani R	4	Usha Nandhini S	2021-03-31 10:57:52	2021-03-31 11:01:16																												31-Mar-2021		31-Mar-2021
1	2021-03-31	frym-09-645707	Completed	11:11:50	Sathya R	Nathiya S	5	Nathiya S	2021-03-31 12:00:24	2021-03-31 12:04:11																												31-Mar-2021		31-Mar-2021
1	2021-03-31	frym-09-582203	Completed	11:15:16	Sathya R	Nathiya S	3	Nathiya S	2021-03-31 12:04:29	2021-03-31 12:14:22																												31-Mar-2021		31-Mar-2021
1	2021-03-31	fpsyg-12-660564	Completed	11:19:07	Thomas S	Janani M	5	Maheswari D	2021-03-31 11:44:21	2021-03-31 11:46:40																												31-Mar-2021		31-Mar-2021
1	2021-03-31	fpubh-09-641253	Completed	11:21:53	Prakash A	Durga B	4	Usha Nandhini S	2021-03-31 11:31:38	2021-03-31 11:38:23																												31-Mar-2021		31-Mar-2021
1	2021-03-31	fpsyt-12-581093	Completed	11:22:09	Ajith L	Divya A	8	Usha Nandhini S	2021-03-31 11:38:36	2021-03-31 11:49:12																												31-Mar-2021		31-Mar-2021
1	2021-03-31	fphys-12-668267	Completed	11:22:38	Uma Y	Durga B	3	Maheswari D	2021-03-31 11:53:31	2021-03-31 12:01:03																												31-Mar-2021		31-Mar-2021
1	2021-03-31	fnagi-13-643135	Completed	11:23:06	Uma Y	Durga B	2	Maheswari D	2021-03-31 12:22:08	2021-03-31 12:28:57																												31-Mar-2021		31-Mar-2021
1	2021-03-31	fmed-08-642864	Completed	11:25:39	Gowthami L	SenthilKumar P	1	Maheswari D	2021-03-31 12:11:21	2021-03-31 12:16:41																												31-Mar-2021		31-Mar-2021
2	2021-03-31	fneur-12-606219	Completed	11:32:14	Manoj B	Gopala Krishnan R	2	Gowtham M	2021-03-31 15:41:26	2021-03-31 15:49:18	16:05:53	Manoj B	Gopala Krishnan R	1	Gowtham M	2021-03-31 16:10:26	2021-03-31 16:16:40																					31-Mar-2021		31-Mar-2021
1	2021-03-31	finsc-01-650520	Completed	11:33:08	Priyadharshini S	Muthu Kumar M	2	Gowtham M	2021-03-31 14:03:41	2021-03-31 14:10:26																												31-Mar-2021		31-Mar-2021
1	2021-03-31	fpubh-09-645499	Completed	11:35:30	Dinesh Kumar M	Punniyamoorthy K	2	Usha Nandhini S	2021-03-31 11:49:25	2021-03-31 12:13:40																												31-Mar-2021		31-Mar-2021
2	2021-03-31	frwa-03-649445	Completed	11:47:13	Thomas S	Janani M	5	Maheswari D	2021-03-31 12:01:38	2021-03-31 12:04:56	14:24:32	Thomas S	Janani M	2	Maheswari D	2021-03-31 14:31:13	2021-03-31 14:42:31																					31-Mar-2021		31-Mar-2021
1	2021-03-31	fpsyt-12-609020	Completed	11:55:28	Ajith L	Gopala Krishnan R	10	Usha Nandhini S	2021-03-31 12:14:50	2021-03-31 12:23:04																												31-Mar-2021		31-Mar-2021
1	2021-03-31	fnagi-13-626974	Completed	12:03:42	Muthulakshmi R	Yogadharshni U	5	Usha Nandhini S	2021-03-31 12:23:26	2021-03-31 12:26:36																												31-Mar-2021		31-Mar-2021
1	2021-03-31	falgy-02-628400	Completed	12:04:29	Prakash A	Durga B	4	Usha Nandhini S	2021-03-31 12:35:51	2021-03-31 13:04:08																												31-Mar-2021		31-Mar-2021
1	2021-03-31	fgene-12-644211	Completed	12:08:15	Gowthami L	Saravanavel Murugan P	6	Maheswari D	2021-03-31 12:42:25	2021-03-31 12:50:24																												31-Mar-2021		31-Mar-2021
1	2021-03-31	fmed-08-656047	Completed	12:11:09	Dinesh Kumar M	Durga B	2	Usha Nandhini S	2021-03-31 13:04:18	2021-03-31 13:21:40																												31-Mar-2021		31-Mar-2021
1	2021-03-31	fpsyt-12-610457	Completed	12:13:16	Ajith L	Punniyamoorthy K	2	Usha Nandhini S	2021-03-31 13:22:04	2021-03-31 13:24:44																												31-Mar-2021		31-Mar-2021
1	2021-03-31	fneur-12-656294	Completed	12:19:59	Thomas S	Janani K	5	Maheswari D	2021-03-31 12:50:36	2021-03-31 13:04:15																												31-Mar-2021		31-Mar-2021
1	2021-03-31	fmed-08-647834	Completed	12:24:55	Prakash A	Divya A	4	Santhosh Kumar L	2021-03-31 14:17:06	2021-03-31 14:18:51																												31-Mar-2021		31-Mar-2021
1	2021-03-31	fpsyt-12-640921	Completed	12:31:02	Manoj B	Divya A	1	Gowtham M	2021-03-31 15:49:27	2021-03-31 15:54:09																												31-Mar-2021		31-Mar-2021
1	2021-03-31	fgene-12-650821	Completed	12:33:22	Gowthami L	SenthilKumar P	5	Maheswari D	2021-03-31 13:05:23	2021-03-31 13:10:13																												31-Mar-2021		31-Mar-2021
1	2021-03-31	fvets-08-658968	Completed	12:39:10	Thomas S	Janani M	5	Maheswari D	2021-03-31 13:10:52	2021-03-31 13:14:00																												31-Mar-2021		31-Mar-2021
1	2021-03-31	fmed-08-654197	Completed	12:47:10	Prakash A	Nathiya S	4	Gowtham M	2021-03-31 14:18:06	2021-03-31 14:22:00																												31-Mar-2021		31-Mar-2021
1	2021-03-31	fmed-08-654627	Completed	12:52:11	Uma Y	SenthilKumar P	8	Maheswari D	2021-03-31 13:14:27	2021-03-31 13:29:54																												31-Mar-2021		31-Mar-2021
1	2021-03-31	fcvm-08-664803	Completed	12:52:35	Manoj B	Sumithra P	2	Santhosh Kumar L	2021-03-31 14:26:43	2021-03-31 14:27:53																												31-Mar-2021		31-Mar-2021
1	2021-03-31	fneur-12-660087	Completed	12:53:20	Dinesh Kumar M	Nathiya S	2	Usha Nandhini S	2021-03-31 14:18:03	2021-03-31 14:32:37																												31-Mar-2021		31-Mar-2021
1	2021-03-31	fpos-03-621370	Completed	12:58:24	Muthulakshmi R	Kalaivani R	10	Usha Nandhini S	2021-03-31 13:43:04	2021-03-31 14:01:14																												31-Mar-2021		31-Mar-2021
1	2021-03-31	fpsyg-12-570563	Completed	13:03:24	Gowthami L	Sumithra P	5	Maheswari D	2021-03-31 13:32:07	2021-03-31 13:47:57																												31-Mar-2021		31-Mar-2021
1	2021-03-31	fpsyg-12-576943	Completed	13:07:54	Ajith L	Aswini M	8	Usha Nandhini S	2021-03-31 13:25:06	2021-03-31 13:42:44																												31-Mar-2021		31-Mar-2021
1	2021-03-31	fgene-12-668871	Completed	13:17:00	Thomas S	Sridhar G	5	Maheswari D	2021-03-31 13:49:27	2021-03-31 13:56:25																												31-Mar-2021		31-Mar-2021
1	2021-03-31	fneur-12-606617	Completed	13:25:36	Gowthami L	Sarbudeen P	3	Maheswari D	2021-03-31 14:18:37	2021-03-31 14:21:47																												31-Mar-2021		31-Mar-2021
1	2021-03-31	fphy-09-645249	Completed	13:27:32	Muthulakshmi R	Kalaivani R	3	Usha Nandhini S	2021-03-31 14:15:00	2021-03-31 14:17:51																												31-Mar-2021		31-Mar-2021
1	2021-03-31	frsus-02-656818	Completed	13:31:43	Priyadharshini S	Muthu Kumar M	2	Gowtham M	2021-03-31 14:10:33	2021-03-31 14:16:50																												31-Mar-2021		31-Mar-2021
1	2021-03-31	fpsyg-12-623935	Completed	13:44:26	Uma Y	SenthilKumar P	6	Maheswari D	2021-03-31 14:01:09	2021-03-31 14:07:45																												31-Mar-2021		31-Mar-2021
1	2021-03-31	fneur-12-582149	Completed	13:49:10	Prakash A	SenthilKumar P	4	Maheswari D	2021-03-31 14:08:40	2021-03-31 14:15:35																												31-Mar-2021		31-Mar-2021
2	2021-03-31	fpsyt-12-608317	Completed	14:04:17	Thomas S	Sridhar G	5	Maheswari D	2021-03-31 14:22:15	2021-03-31 14:30:50	18:09:02	Priyadharshini S	Durga B	10	Gowtham M	2021-03-31 20:33:45	2021-03-31 20:43:48																					31-Mar-2021		31-Mar-2021
1	2021-03-31	fcvm-08-665038	Completed	14:25:38	Manoj B	Divya A	3	Gowtham M	2021-03-31 15:54:26	2021-03-31 16:10:07																												31-Mar-2021		31-Mar-2021
1	2021-03-31	fcell-09-678307	Completed	14:44:03	Manoj B	Janani K	2	Santhosh Kumar L	2021-03-31 15:32:29	2021-03-31 15:35:29																												31-Mar-2021		31-Mar-2021
1	2021-03-31	fpsyg-12-633490	Completed	15:01:24	Jeyaseelan R	Durga B	1	Gowtham M	2021-03-31 16:27:23	2021-03-31 16:41:38																												31-Mar-2021		31-Mar-2021
1	2021-03-31	fneur-12-620757	Completed	15:07:15	Prakash A	Saravanavel Murugan P	1	Santhosh Kumar L	2021-03-31 15:45:51	2021-03-31 15:48:19																												31-Mar-2021		31-Mar-2021
1	2021-03-31	fnins-15-620863	Completed	15:50:53	Prakash A	Saravanavel Murugan P	4	Santhosh Kumar L	2021-03-31 15:55:11	2021-03-31 16:09:29																												31-Mar-2021		31-Mar-2021
1	2021-03-31	fmed-08-660580	Completed	15:58:22	Uma Y	Saravanavel Murugan P	1	Gowtham M	2021-03-31 16:18:54	2021-03-31 16:25:58																												31-Mar-2021		31-Mar-2021
1	2021-03-31	fneur-12-629211	Completed	16:10:08	Prakash A	Saravanavel Murugan P	4	Santhosh Kumar L	2021-03-31 16:14:19	2021-03-31 16:25:33																												31-Mar-2021		31-Mar-2021
1	2021-03-31	fnmol-14-650498	Completed	16:14:00	Thomas S	Janani M	2	Gowtham M	2021-03-31 16:56:28	2021-03-31 17:00:59																												31-Mar-2021		31-Mar-2021
1	2021-03-31	frsus-02-631631	Completed	16:30:09	Uma Y	Saravanavel Murugan P	5	Santhosh Kumar L	2021-03-31 16:37:49	2021-03-31 16:40:58																												31-Mar-2021		31-Mar-2021
1	2021-03-31	fmats-08-635987	Completed	16:41:01	Manoj B	Janani M	2	Gowtham M	2021-03-31 16:44:53	2021-03-31 16:56:01																												31-Mar-2021		31-Mar-2021
1	2021-03-31	fimmu-12-647540	Completed	16:41:49	Buvanenthiran P	Kalaivani R	5	Santhosh Kumar L	2021-03-31 16:50:44	2021-03-31 16:52:37																												31-Mar-2021		31-Mar-2021
1	2021-03-31	fpsyg-12-645967	Completed	16:42:36	Prakash A	Sumithra P	4	Santhosh Kumar L	2021-03-31 16:47:15	2021-03-31 16:50:12																												31-Mar-2021		31-Mar-2021
1	2021-03-31	fncel-15-629279	Completed	16:47:31	Siva Sankar Narayanan M	Muthu Kumar M	5	Santhosh Kumar L	2021-03-31 16:53:22	2021-03-31 17:01:45																												31-Mar-2021		31-Mar-2021
1	2021-03-31	fnut-08-655032	Completed	16:56:40	Uma Y	Saravanavel Murugan P	3	Gowtham M	2021-03-31 17:01:20	2021-03-31 17:10:47																												31-Mar-2021		31-Mar-2021
1	2021-03-31	fpsyt-12-635514	Completed	16:57:38	Mahalingam K	Gopala Krishnan R	7	Santhosh Kumar L	2021-03-31 17:01:52	2021-03-31 17:11:07																												31-Mar-2021		31-Mar-2021
1	2021-03-31	fpubh-09-668351	Completed	17:06:37	Gowrishankar S	Aswini M	5	Santhosh Kumar L	2021-03-31 17:11:21	2021-03-31 17:23:30																												31-Mar-2021		31-Mar-2021
1	2021-03-31	fpsyt-12-557282	Completed	17:08:22	Jeyaseelan R	Sumithra P	1	Gowtham M	2021-03-31 17:58:06	2021-03-31 18:17:26																												31-Mar-2021		31-Mar-2021
1	2021-03-31	fnut-08-646275	Completed	17:10:47	Priyadharshini S	Saravanavel Murugan P	10	Gowtham M	2021-03-31 17:23:07	2021-03-31 17:38:19																												31-Mar-2021		31-Mar-2021
1	2021-03-31	fpsyt-12-626456	Completed	17:25:05	Mahalingam K	Gopala Krishnan R	7	Santhosh Kumar L	2021-03-31 17:27:15	2021-03-31 17:35:35																												31-Mar-2021		31-Mar-2021
1	2021-03-31	frai-04-644554	Completed	18:12:38	Siva Sankar Narayanan M	Gopala Krishnan R	5	Santhosh Kumar L	2021-03-31 18:17:18	2021-03-31 18:30:11																												31-Mar-2021		31-Mar-2021
1	2021-03-31	fped-09-648536	Completed	18:14:32	Devilakshmi R	Aswini M	1	Gowtham M	2021-03-31 19:11:54	2021-03-31 19:24:11																												31-Mar-2021		31-Mar-2021
1	2021-03-31	fsoc-06-635986	Completed	18:19:01	Jeyaseelan R	Gopala Krishnan R	1	Gowtham M	2021-03-31 20:15:37	2021-03-31 20:19:15																												31-Mar-2021		31-Mar-2021
1	2021-03-31	fneur-12-595741	Completed	18:46:40	Gowrishankar S	Durga B	7	Santhosh Kumar L	2021-03-31 18:47:23	2021-03-31 19:07:27																												31-Mar-2021		31-Mar-2021
1	2021-03-31	fenrg-09-672999	Completed	18:50:56	Priyadharshini S	Janani M	10	Gowtham M	2021-03-31 20:43:56	2021-03-31 20:55:26																												31-Mar-2021		31-Mar-2021
1	2021-03-31	fpsyg-12-603597	Completed	18:51:17	Jeyaseelan R	Sumithra P	1	Gowtham M	2021-03-31 20:19:22	2021-03-31 20:32:34																												31-Mar-2021		31-Mar-2021
1	2021-03-31	fams-07-624456	Completed	18:52:11	Buvanenthiran P	Muthu Kumar M	2	Santhosh Kumar L	2021-03-31 19:07:34	2021-03-31 19:11:49																												31-Mar-2021		31-Mar-2021
1	2021-03-31	fpubh-09-593176	Completed	18:54:34	Devilakshmi R	Sumithra P	2	Santhosh Kumar L	2021-03-31 19:44:53	2021-03-31 19:54:04																												31-Mar-2021		31-Mar-2021
1	2021-03-31	fneur-12-642912	Completed	19:10:48	Siva Sankar Narayanan M	Gopala Krishnan R	5	Santhosh Kumar L	2021-03-31 19:28:20	2021-03-31 19:43:20																												31-Mar-2021		31-Mar-2021
1	2021-03-31	fneur-12-609866	Completed	19:36:52	Priyadharshini S	Janani M	10	Gowtham M	2021-03-31 20:57:57	2021-03-31 21:35:50																												31-Mar-2021		31-Mar-2021
1	2021-03-31	frwa-03-645675	Completed	19:46:23	Buvanenthiran P	Saravanavel Murugan P	4	Santhosh Kumar L	2021-03-31 19:54:28	2021-03-31 19:57:22																												31-Mar-2021		31-Mar-2021
1	2021-03-31	fgene-12-651878	Completed	19:50:44	Siva Sankar Narayanan M	Aswini M	5	Santhosh Kumar L	2021-03-31 19:57:29	2021-03-31 20:12:41																												31-Mar-2021		31-Mar-2021
1	2021-03-31	fcvm-08-603501	Completed	20:02:01	Buvanenthiran P	Sumithra P	2	Santhosh Kumar L	2021-03-31 20:12:57	2021-03-31 20:14:16																												31-Mar-2021		31-Mar-2021
1	2021-03-31	fphys-12-640295	Completed	20:02:16	Gowrishankar S	Sridhar G	6	Santhosh Kumar L	2021-03-31 20:14:24	2021-03-31 20:24:49																												31-Mar-2021		31-Mar-2021
1	2021-03-31	fmed-08-656667	Completed	20:09:28	Mahalingam K	Sumithra P	7	Santhosh Kumar L	2021-03-31 20:25:00	2021-03-31 20:28:24																												31-Mar-2021		31-Mar-2021
1	2021-03-31	fgene-12-663110	Completed	20:20:00	Siva Sankar Narayanan M	Kalaivani R	5	Santhosh Kumar L	2021-03-31 20:30:24	2021-03-31 20:33:36																												31-Mar-2021		31-Mar-2021
1	2021-03-31	fpubh-09-542778	Completed	20:35:53	Mahalingam K	Janani M	7	Santhosh Kumar L	2021-03-31 20:42:47	2021-03-31 20:45:22																												31-Mar-2021		31-Mar-2021
1	2021-03-31	frobt-08-640444	Completed	20:37:01	Buvanenthiran P	Divya A	3	Santhosh Kumar L	2021-03-31 20:45:31	2021-03-31 20:48:41																												31-Mar-2021		31-Mar-2021
1	2021-03-31	fpsyg-12-585321	Cor inprocess	20:40:28	Jeyaseelan R	Gopala Krishnan R	9																															31-Mar-2021		00-Jan-1900
1	2021-03-31	fpsyg-12-626797	Completed	20:46:39	Gowrishankar S	Divya A	8	Santhosh Kumar L	2021-03-31 20:48:49	2021-03-31 20:53:10																												31-Mar-2021		31-Mar-2021
1	2021-03-31	fpsyg-12-644337	Completed	20:54:04	Devilakshmi R	Muthu Kumar M	0	Gowtham M	2021-03-31 20:55:53	2021-03-31 20:57:02																												31-Mar-2021		31-Mar-2021
1	2021-03-31	fmed-08-677866	Completed	20:54:49	Priyadharshini S	Muthu Kumar M	5	Gowtham M	2021-03-31 21:40:19	2021-03-31 21:44:12																												31-Mar-2021		31-Mar-2021
1	2021-03-31	fbioe-09-677976	Completed	21:03:35	Buvanenthiran P	Sridhar G	2	Santhosh Kumar L	2021-03-31 21:15:39	2021-03-31 21:17:28																												31-Mar-2021		31-Mar-2021
1	2021-03-31	fvets-08-659330	Completed	21:04:43	Mahalingam K	Janani M	7	Santhosh Kumar L	2021-03-31 21:17:39	2021-03-31 21:19:36																												31-Mar-2021		31-Mar-2021
1	2021-03-31	fvets-08-647609	Completed	21:10:29	Mohan R	Durga B	2	Santhosh Kumar L	2021-03-31 21:19:48	2021-03-31 21:25:57																												31-Mar-2021		31-Mar-2021
1	2021-03-31	fpubh-09-623088	Completed	21:21:19	Gowrishankar S	Kalaivani R	4	Santhosh Kumar L	2021-03-31 21:26:25	2021-03-31 21:39:17																												31-Mar-2021		31-Mar-2021
1	2021-03-31	fped-09-637167	Completed	21:35:00	Buvanenthiran P	Janani M	2	Santhosh Kumar L	2021-03-31 21:39:27	2021-03-31 21:44:41																												31-Mar-2021		31-Mar-2021
1	2021-03-31	fneur-12-642800	Completed	21:35:53	Priyadharshini S	Gopala Krishnan R	10	Gowtham M	2021-03-31 21:44:18	2021-03-31 21:54:05																												31-Mar-2021		31-Mar-2021
1	2021-03-31	fcell-09-621482	Completed	21:51:43	Gowrishankar S	Sumithra P	3	Santhosh Kumar L	2021-03-31 21:52:27	2021-03-31 22:00:49																												31-Mar-2021		31-Mar-2021
1	2021-03-31	fgwh-02-624485	Completed	21:57:59	Buvanenthiran P	Divya A	2	Santhosh Kumar L	2021-03-31 22:00:56	2021-03-31 22:06:35																												31-Mar-2021		31-Mar-2021
1	2021-03-31	fsufs-05-642635	Completed	23:37:10	Devilakshmi R	Nathiya S	10	Maheswari D	2021-04-01 07:02:35	2021-04-01 08:07:57																												31-Mar-2021		01-Apr-2021
1	2021-03-31	fgene-12-641575	Completed	23:57:09	Mohan R	Sumithra P	3	Maheswari D	2021-04-01 08:20:00	2021-04-01 08:23:12																												31-Mar-2021		01-Apr-2021
1	2021-04-01	fsufs-05-654313	Completed	00:30:37	Mohan R	Sridhar G	2	Usha Nandhini S	2021-04-01 10:46:31	2021-04-01 10:50:05																												01-Apr-2021		01-Apr-2021
1	2021-04-01	fpubh-09-635266	Completed	00:33:41	Devilakshmi R	Nathiya S	2	Maheswari D	2021-04-01 08:15:55	2021-04-01 08:19:25																												01-Apr-2021		01-Apr-2021
1	2021-04-01	fmed-08-624285	Completed	00:49:01	Mohan R	Durga B	3	Santhosh Kumar L	2021-04-01 18:55:19	2021-04-01 20:29:23																												01-Apr-2021		01-Apr-2021
1	2021-04-01	fclim-03-615032	Completed	01:23:48	Mohan R	Aswini M	2	Usha Nandhini S	2021-04-01 10:51:03	2021-04-01 10:55:22																												01-Apr-2021		01-Apr-2021
1	2021-04-01	fpsyg-12-646047	Completed	01:35:18	Mohan R	Nathiya S	2	Usha Nandhini S	2021-04-01 11:14:47	2021-04-01 14:50:56																												01-Apr-2021		01-Apr-2021
1	2021-04-01	fpsyg-12-650715	Completed	01:51:50	Mohan R	Janani M	2	Usha Nandhini S	2021-04-01 11:30:17	2021-04-01 11:34:10																												01-Apr-2021		01-Apr-2021
1	2021-04-01	fpsyg-12-576943	Completed	06:22:52	Ajith L	Punniyamoorthy K	3	Usha Nandhini S	2021-04-01 07:37:48	2021-04-01 07:42:45																												01-Apr-2021		01-Apr-2021
1	2021-04-01	fmech-07-651149	Completed	06:40:18	Ajith L	Punniyamoorthy K	1	Usha Nandhini S	2021-04-01 07:43:45	2021-04-01 07:46:05																												01-Apr-2021		01-Apr-2021
1	2021-04-01	fcell-09-645641	Completed	07:19:49	Ajith L	Kalaivani R	8	Usha Nandhini S	2021-04-01 07:46:24	2021-04-01 07:56:34																												01-Apr-2021		01-Apr-2021
1	2021-04-01	fpsyg-12-652326	Completed	07:23:11	Thomas S	Saravanavel Murugan P	5	Maheswari D	2021-04-01 09:22:38	2021-04-01 09:26:50																												01-Apr-2021		01-Apr-2021
3	2021-04-01	fbuil-07-621037	Completed	07:25:14	Uma Y	Sumithra P	10	Maheswari D	2021-04-01 09:28:37	2021-04-01 09:53:06	12:30:40	Uma Y	Gopala Krishnan R	8	Maheswari D	2021-04-01 12:32:14	2021-04-01 12:51:32	12:57:42	Uma Y	Gopala Krishnan R	2	Maheswari D	2021-04-01 13:05:25	2021-04-01 13:13:04														01-Apr-2021		01-Apr-2021
1	2021-04-01	fpsyg-12-657385	Completed	07:33:03	Dinesh Kumar M	Gopala Krishnan R	2	Usha Nandhini S	2021-04-01 07:56:44	2021-04-01 07:58:55																												01-Apr-2021		01-Apr-2021
1	2021-04-01	feduc-06-647445	Completed	07:41:30	Ajith L	Muthu Kumar M	6	Usha Nandhini S	2021-04-01 07:59:08	2021-04-01 08:03:18																												01-Apr-2021		01-Apr-2021
1	2021-04-01	fnut-08-644800	Completed	07:45:02	Muthulakshmi R	Sridhar G	7	Usha Nandhini S	2021-04-01 08:03:29	2021-04-01 09:17:16																												01-Apr-2021		01-Apr-2021
1	2021-04-01	fsurg-08-629367	Completed	08:02:15	Gowthami L	SenthilKumar P	5	Maheswari D	2021-04-01 09:45:13	2021-04-01 09:56:41																												01-Apr-2021		01-Apr-2021
1	2021-04-01	fsoc-06-637671	Completed	08:03:23	Dinesh Kumar M	Kalaivani R	3	Usha Nandhini S	2021-04-01 08:53:49	2021-04-01 08:58:00																												01-Apr-2021		01-Apr-2021
1	2021-04-01	fvets-08-658675	Completed	08:37:56	Muthulakshmi R	Sridhar G	7	Usha Nandhini S	2021-04-01 09:01:38	2021-04-01 09:08:50																												01-Apr-2021		01-Apr-2021
1	2021-04-01	fnano-03-667287	Completed	08:42:04	Prakash A	Sumithra P	2	Usha Nandhini S	2021-04-01 08:58:10	2021-04-01 09:01:25																												01-Apr-2021		01-Apr-2021
1	2021-04-01	fchem-09-653238	Completed	08:52:59	Thomas S	SenthilKumar P	5	Maheswari D	2021-04-01 10:01:40	2021-04-01 10:04:35																												01-Apr-2021		01-Apr-2021
1	2021-04-01	fgene-12-651979	Completed	08:53:18	Dinesh Kumar M	Sumithra P	2	Usha Nandhini S	2021-04-01 09:09:54	2021-04-01 09:31:34																												01-Apr-2021		01-Apr-2021
1	2021-04-01	ftox-03-654077	Completed	09:07:24	Gowthami L	Sridhar G	5	Maheswari D	2021-04-01 10:08:36	2021-04-01 10:16:19																												01-Apr-2021		01-Apr-2021
1	2021-04-01	fcvm-08-631374	Completed	09:08:59	Thomas S	Kalaivani R	5	Maheswari D	2021-04-01 10:16:33	2021-04-01 10:31:25																												01-Apr-2021		01-Apr-2021
1	2021-04-01	ffunb-02-633876	Completed	09:11:47	Muthulakshmi R	Sridhar G	5	Usha Nandhini S	2021-04-01 09:31:43	2021-04-01 09:34:46																												01-Apr-2021		01-Apr-2021
1	2021-04-01	fnbot-15-661603	Completed	09:18:33	Prakash A	Muthu Kumar M	2	Usha Nandhini S	2021-04-01 09:34:59	2021-04-01 09:37:14																												01-Apr-2021		01-Apr-2021
2	2021-04-01	frsc-03-632020	Completed	09:26:22	Uma Y	Durga B	6	Maheswari D	2021-04-01 10:31:37	2021-04-01 10:58:23	11:46:18	Uma Y	Kalaivani R	1	Maheswari D	2021-04-01 12:54:18	2021-04-01 12:56:44																					01-Apr-2021		01-Apr-2021
1	2021-04-01	fpsyg-12-626662	Completed	09:33:36	Dinesh Kumar M	Gopala Krishnan R	1	Usha Nandhini S	2021-04-01 09:37:28	2021-04-01 09:41:50																												01-Apr-2021		01-Apr-2021
1	2021-04-01	fenvs-09-666362	Completed	09:38:10	Ajith L	Sridhar G	7	Usha Nandhini S	2021-04-01 09:42:01	2021-04-01 09:47:26																												01-Apr-2021		01-Apr-2021
1	2021-04-01	fchem-09-660927	Completed	09:41:45	Gowthami L	Saravanavel Murugan P	3	Maheswari D	2021-04-01 10:58:34	2021-04-01 11:55:38																												01-Apr-2021		01-Apr-2021
1	2021-04-01	fneur-12-565387	Completed	09:54:06	Prakash A	Sridhar G	4	Usha Nandhini S	2021-04-01 10:08:18	2021-04-01 10:39:42																												01-Apr-2021		01-Apr-2021
1	2021-04-01	fchem-09-617353	Completed	10:14:36	Uma Y	Durga B	5	Maheswari D	2021-04-01 11:02:14	2021-04-01 11:17:14																												01-Apr-2021		01-Apr-2021
1	2021-04-01	fped-09-613292	Completed	10:15:56	Gowthami L	Gopala Krishnan R	2	Maheswari D	2021-04-01 11:17:24	2021-04-01 11:23:36																												01-Apr-2021		01-Apr-2021
1	2021-04-01	fgene-12-657824	Completed	10:19:47	Ajith L	Durga B	2	Usha Nandhini S	2021-04-01 10:40:03	2021-04-01 10:44:03																												01-Apr-2021		01-Apr-2021
1	2021-04-01	fphys-12-663313	Completed	10:48:39	Manoj B	Janani M	3	Maheswari D	2021-04-01 11:55:59	2021-04-01 12:01:18																												01-Apr-2021		01-Apr-2021
1	2021-04-01	fneur-12-627672	Completed	10:50:28	Prakash A	Kalaivani R	4	Usha Nandhini S	2021-04-01 10:55:31	2021-04-01 11:07:44																												01-Apr-2021		01-Apr-2021
1	2021-04-01	fonc-11-654727	Completed	10:52:43	Uma Y	Durga B	4	Maheswari D	2021-04-01 12:01:29	2021-04-01 12:10:03																												01-Apr-2021		01-Apr-2021
1	2021-04-01	fpubh-09-647230	Completed	10:58:32	Gowthami L	Gopala Krishnan R	4	Usha Nandhini S	2021-04-01 12:08:47	2021-04-01 12:12:44																												01-Apr-2021		01-Apr-2021
1	2021-04-01	fsufs-05-668561	Completed	11:06:57	Muthulakshmi R	Sridhar G	6	Usha Nandhini S	2021-04-01 11:07:51	2021-04-01 11:14:19																												01-Apr-2021		01-Apr-2021
2	2021-04-01	fimmu-12-632513	Completed	11:16:23	Ajith L	Sridhar G	6	Usha Nandhini S	2021-04-01 11:18:01	2021-04-01 11:26:42	13:14:38	Ajith L	Sridhar G	1	Usha Nandhini S	2021-04-01 13:34:14	2021-04-01 13:34:19																					01-Apr-2021		01-Apr-2021
1	2021-04-01	fneur-12-653820	Completed	11:19:35	Prakash A	Divya A	4	Usha Nandhini S	2021-04-01 11:27:14	2021-04-01 11:29:32																												01-Apr-2021		01-Apr-2021
1	2021-04-01	fchem-09-626834	Completed	11:24:47	Uma Y	Durga B	4	Usha Nandhini S	2021-04-01 11:38:34	2021-04-01 13:29:57																												01-Apr-2021		01-Apr-2021
1	2021-04-01	fphys-12-647923	Completed	11:27:14	Manoj B	Divya A	2	Usha Nandhini S	2021-04-01 12:13:13	2021-04-01 12:17:16																												01-Apr-2021		01-Apr-2021
1	2021-04-01	fgene-12-675351	Completed	11:39:47	Gowthami L	Gopala Krishnan R	2	Maheswari D	2021-04-01 12:20:15	2021-04-01 12:22:41																												01-Apr-2021		01-Apr-2021
1	2021-04-01	fped-09-647680	Completed	11:42:44	Devilakshmi R	Saravanavel Murugan P	0	Maheswari D	2021-04-01 11:43:56	2021-04-01 11:44:02																												01-Apr-2021		01-Apr-2021
1	2021-04-01	fneur-12-581102	Completed	11:44:37	Ajith L	Durga B	3	Usha Nandhini S	2021-04-01 11:54:46	2021-04-01 11:58:39																												01-Apr-2021		01-Apr-2021
1	2021-04-01	fnint-15-652218	Completed	11:52:21	Dinesh Kumar M	Aswini M	2	Usha Nandhini S	2021-04-01 11:59:15	2021-04-01 12:07:30																												01-Apr-2021		01-Apr-2021
1	2021-04-01	fped-09-653676	Completed	12:09:32	Thomas S	Janani K	5	Maheswari D	2021-04-01 12:22:55	2021-04-01 12:31:54																												01-Apr-2021		01-Apr-2021
1	2021-04-01	fmed-08-641965	Completed	12:27:27	Dinesh Kumar M	Saravanavel Murugan P	2	Usha Nandhini S	2021-04-01 12:29:12	2021-04-01 12:42:04																												01-Apr-2021		01-Apr-2021
1	2021-04-01	fneur-12-628523	Completed	12:28:13	Ajith L	Gopala Krishnan R	3	Usha Nandhini S	2021-04-01 12:42:49	2021-04-01 12:46:52																												01-Apr-2021		01-Apr-2021
1	2021-04-01	fneur-12-664796	Completed	12:29:13	Prakash A	Kalaivani R	5	Usha Nandhini S	2021-04-01 12:47:03	2021-04-01 13:38:45																												01-Apr-2021		01-Apr-2021
1	2021-04-01	fvets-08-633509	Completed	12:42:55	Ajith L	Sumithra P	2	Usha Nandhini S	2021-04-01 12:47:44	2021-04-01 12:54:53																												01-Apr-2021		01-Apr-2021
1	2021-04-01	fphys-12-624989	Completed	12:43:25	Prakash A	Janani K	4	Usha Nandhini S	2021-04-01 13:38:51	2021-04-01 13:45:55																												01-Apr-2021		01-Apr-2021
1	2021-04-01	fnut-08-657663	Completed	12:50:56	Amshaveni N	SenthilKumar P	3	Maheswari D	2021-04-01 12:56:56	2021-04-01 13:04:06																												01-Apr-2021		01-Apr-2021
1	2021-04-01	fmicb-12-635821	Completed	13:42:31	Gowthami L	Saravanavel Murugan P	8	Maheswari D	2021-04-01 13:44:23	2021-04-01 15:09:50																												01-Apr-2021		01-Apr-2021
1	2021-04-01	fpsyg-12-567720	Completed	13:54:20	Muthulakshmi R	Saravanavel Murugan P	5	Usha Nandhini S	2021-04-01 14:20:13	2021-04-01 14:26:25																												01-Apr-2021		01-Apr-2021
1	2021-04-01	fenvs-09-676011	Completed	13:54:48	Prakash A	Durga B	4	Usha Nandhini S	2021-04-01 14:07:51	2021-04-01 15:03:36																												01-Apr-2021		01-Apr-2021
1	2021-04-01	fpsyg-12-591152	Completed	14:00:22	Manoj B	Sridhar G	3	Santhosh Kumar L	2021-04-01 15:04:03	2021-04-01 15:04:49																												01-Apr-2021		01-Apr-2021
1	2021-04-01	fpsyt-12-598317	Completed	14:23:10	Muthulakshmi R	Saravanavel Murugan P	5	Usha Nandhini S	2021-04-01 14:29:44	2021-04-01 15:08:52																												01-Apr-2021		01-Apr-2021
1	2021-04-01	fnagi-13-637363	Completed	14:24:01	Amshaveni N	Punniyamoorthy K	6	Santhosh Kumar L	2021-04-01 17:22:31	2021-04-01 17:27:35																												01-Apr-2021		01-Apr-2021
1	2021-04-01	fnagi-13-624330	Completed	14:26:13	Thomas S	SenthilKumar P	5	Maheswari D	2021-04-01 14:53:51	2021-04-01 14:54:00																												01-Apr-2021		01-Apr-2021
1	2021-04-01	fams-07-651467	Completed	14:35:37	Jeyaseelan R	Muthu Kumar M	1	Gowtham M	2021-04-01 16:09:05	2021-04-01 16:23:24																												01-Apr-2021		01-Apr-2021
1	2021-04-01	fphys-12-651428	Completed	14:41:51	Priyadharshini S	Nathiya S	10	Gowtham M	2021-04-01 14:49:49	2021-04-01 15:09:34																												01-Apr-2021		01-Apr-2021
1	2021-04-01	fpsyg-12-533884	Completed	14:48:02	Gowrishankar S	Aswini M	3	Santhosh Kumar L	2021-04-01 14:53:08	2021-04-01 15:02:00																												01-Apr-2021		01-Apr-2021
1	2021-04-01	fpubh-09-577079	Completed	14:56:06	Sathya R	Gopala Krishnan R	3	Gowtham M	2021-04-01 15:40:01	2021-04-01 16:00:07																												01-Apr-2021		01-Apr-2021
1	2021-04-01	fpubh-09-602546	Completed	15:10:27	Jeyaseelan R	Muthu Kumar M	1	Gowtham M	2021-04-01 17:04:43	2021-04-01 17:21:20																												01-Apr-2021		01-Apr-2021
1	2021-04-01	fpsyg-12-647710	Completed	15:17:13	Manoj B	Divya A	3	Gowtham M	2021-04-01 16:00:48	2021-04-01 16:08:51																												01-Apr-2021		01-Apr-2021
1	2021-04-01	fpsyg-12-670196	Completed	15:39:41	Manoj B	Gopala Krishnan R	3	Santhosh Kumar L	2021-04-01 15:42:24	2021-04-01 15:45:11																												01-Apr-2021		01-Apr-2021
1	2021-04-01	frym-09-579895	Completed	15:45:58	Sathya R	Nathiya S	3	Vignesh V	2021-04-02 09:44:05	2021-04-02 09:48:14																												01-Apr-2021		02-Apr-2021
1	2021-04-01	fvets-08-652224	Completed	15:48:12	Gowrishankar S	Durga B	5	Santhosh Kumar L	2021-04-01 15:49:38	2021-04-01 15:55:18																												01-Apr-2021		01-Apr-2021
1	2021-04-01	fpls-12-670027	Completed	15:48:57	Devilakshmi R	Muthu Kumar M	1	Santhosh Kumar L	2021-04-01 15:56:07	2021-04-01 15:57:53																												01-Apr-2021		01-Apr-2021
1	2021-04-01	fnhum-14-609312	Completed	16:00:34	Buvanenthiran P	Muthu Kumar M	3	Santhosh Kumar L	2021-04-01 16:01:04	2021-04-01 16:07:51																												01-Apr-2021		01-Apr-2021
1	2021-04-01	fpsyt-12-626773	Completed	16:10:34	Mahalingam K	Janani K	7	Santhosh Kumar L	2021-04-01 16:18:03	2021-04-01 16:26:05																												01-Apr-2021		01-Apr-2021
2	2021-04-01	fpsyt-12-650904	Completed	16:11:16	Manoj B	Durga B	3				16:19:15	Manoj B	Divya A	1	Gowtham M	2021-04-01 16:44:41	2021-04-01 16:57:33																					01-Apr-2021		00-Jan-1900
1	2021-04-01	fpubh-09-651089	Completed	16:35:35	Sathya R	Divya A	5	Gowtham M	2021-04-01 17:26:49	2021-04-01 17:31:40																												01-Apr-2021		01-Apr-2021
1	2021-04-01	fpsyg-12-627561	Completed	16:38:45	Jeyaseelan R	Nathiya S	2	Gowtham M	2021-04-01 17:21:28	2021-04-01 17:24:56																												01-Apr-2021		01-Apr-2021
1	2021-04-01	fnut-08-644723	Completed	16:54:42	Siva Sankar Narayanan M	Divya A	5	Santhosh Kumar L	2021-04-01 16:56:15	2021-04-01 17:13:41																												01-Apr-2021		01-Apr-2021
1	2021-04-01	fneur-12-626021	Completed	16:56:45	Gowrishankar S	Kalaivani R	5	Santhosh Kumar L	2021-04-01 17:13:52	2021-04-01 17:17:39																												01-Apr-2021		01-Apr-2021
1	2021-04-01	fpsyt-12-659063	Completed	17:03:31	Mahalingam K	Divya A	9	Santhosh Kumar L	2021-04-01 17:17:48	2021-04-01 17:22:23																												01-Apr-2021		01-Apr-2021
1	2021-04-01	fphys-12-627837	Completed	17:29:26	Siva Sankar Narayanan M	Janani K	5	Santhosh Kumar L	2021-04-01 17:29:59	2021-04-01 17:49:56																												01-Apr-2021		01-Apr-2021
1	2021-04-01	fphy-09-687508	Completed	17:33:31	Priyadharshini S	Sridhar G	10	Gowtham M	2021-04-01 17:41:54	2021-04-01 17:44:37																												01-Apr-2021		01-Apr-2021
1	2021-04-01	fcomm-06-646445	Completed	17:44:41	Priyadharshini S	Sridhar G	10	Gowtham M	2021-04-01 17:45:00	2021-04-01 18:07:23																												01-Apr-2021		01-Apr-2021
1	2021-04-01	fped-09-628496	Completed	17:58:17	Gowrishankar S	SenthilKumar P	4	Santhosh Kumar L	2021-04-01 18:03:59	2021-04-01 18:05:18																												01-Apr-2021		01-Apr-2021
1	2021-04-01	fchem-09-651757	Completed	17:59:27	Siva Sankar Narayanan M	Divya A	5	Santhosh Kumar L	2021-04-01 18:05:37	2021-04-01 18:10:31																												01-Apr-2021		01-Apr-2021
1	2021-04-01	fpubh-09-536342	Completed	18:05:20	Mahalingam K	Gopala Krishnan R	7	Santhosh Kumar L	2021-04-01 18:11:17	2021-04-01 18:13:08																												01-Apr-2021		01-Apr-2021
1	2021-04-01	fmed-08-660877	Completed	18:12:39	Buvanenthiran P	Janani K	6	Santhosh Kumar L	2021-04-01 18:13:16	2021-04-01 18:16:41																												01-Apr-2021		01-Apr-2021
1	2021-04-01	fmed-08-636065	Completed	18:26:12	Siva Sankar Narayanan M	Sumithra P	5	Santhosh Kumar L	2021-04-01 18:28:24	2021-04-01 18:30:45																												01-Apr-2021		01-Apr-2021
1	2021-04-01	fagro-03-642189	Completed	18:28:59	Priyadharshini S	Muthu Kumar M	10	Gowtham M	2021-04-01 19:28:53	2021-04-01 19:51:45																												01-Apr-2021		01-Apr-2021
1	2021-04-01	fdgth-03-636082	Completed	18:37:50	Mahalingam K	Sumithra P	3	Santhosh Kumar L	2021-04-01 19:08:27	2021-04-01 19:11:32																												01-Apr-2021		01-Apr-2021
1	2021-04-01	fpsyg-12-643848	Completed	18:45:13	Jeyaseelan R	Aswini M	4	Gowtham M	2021-04-01 20:10:42	2021-04-01 20:39:15																												01-Apr-2021		01-Apr-2021
2	2021-04-01	fpsyg-12-569113	Completed	18:45:27	Gowrishankar S	Janani M	6	Santhosh Kumar L	2021-04-01 19:26:28	2021-04-01 19:29:55	20:12:12	Gowrishankar S	Janani M	1	Santhosh Kumar L	2021-04-01 20:18:18	2021-04-01 20:19:12																					01-Apr-2021		01-Apr-2021
1	2021-04-01	fcell-09-676949	Completed	18:55:31	Priyadharshini S	Durga B	10	Gowtham M	2021-04-01 20:50:37	2021-04-01 21:00:10																												01-Apr-2021		01-Apr-2021
1	2021-04-01	fmed-08-624924	Completed	19:01:53	Mahalingam K	Saravanavel Murugan P	11	Santhosh Kumar L	2021-04-01 19:30:26	2021-04-01 19:39:26																												01-Apr-2021		01-Apr-2021
2	2021-04-01	fvets-08-654721	Completed	19:02:50	Sathya R	Sridhar G	3	Gowtham M	2021-04-01 19:52:01	2021-04-01 19:56:10	20:30:54	Sathya R	Sridhar G	2	Gowtham M	2021-04-01 20:39:59	2021-04-01 20:45:43																					01-Apr-2021		01-Apr-2021
1	2021-04-01	fmed-08-640740	Completed	19:17:51	Sathya R	Janani M	5	Gowtham M	2021-04-01 19:56:16	2021-04-01 20:00:00																												01-Apr-2021		01-Apr-2021
1	2021-04-01	fpubh-09-675801	Completed	19:33:47	Sathya R	SenthilKumar P	2	Gowtham M	2021-04-01 20:00:07	2021-04-01 20:10:08																												01-Apr-2021		01-Apr-2021
1	2021-04-01	fneur-12-612817	Completed	19:38:24	Buvanenthiran P	Sridhar G	4	Santhosh Kumar L	2021-04-01 19:39:34	2021-04-01 19:50:14																												01-Apr-2021		01-Apr-2021
1	2021-04-01	fpsyt-12-652004	Completed	19:42:25	Buvanenthiran P	Janani K	2	Santhosh Kumar L	2021-04-01 19:50:26	2021-04-01 19:50:35																												01-Apr-2021		01-Apr-2021
1	2021-04-01	fmed-08-658682	Completed	19:45:33	Mahalingam K	Saravanavel Murugan P	7	Santhosh Kumar L	2021-04-01 19:50:52	2021-04-01 20:04:57																												01-Apr-2021		01-Apr-2021
1	2021-04-01	fphys-12-632058	Completed	20:00:50	Buvanenthiran P	Divya A	2	Santhosh Kumar L	2021-04-01 20:05:29	2021-04-01 20:06:28																												01-Apr-2021		01-Apr-2021
1	2021-04-01	fclim-03-656479	Completed	20:04:20	Siva Sankar Narayanan M	Janani K	5	Santhosh Kumar L	2021-04-01 20:06:34	2021-04-01 20:18:05																												01-Apr-2021		01-Apr-2021
1	2021-04-01	fpsyg-12-603553	Completed	20:08:14	Gowrishankar S	Janani M	7	Santhosh Kumar L	2021-04-01 20:19:27	2021-04-01 20:25:34																												01-Apr-2021		01-Apr-2021
1	2021-04-01	fcomp-03-644054	Completed	20:15:34	Priyadharshini S	SenthilKumar P	10	Gowtham M	2021-04-01 21:00:16	2021-04-01 21:12:53																												01-Apr-2021		01-Apr-2021
1	2021-04-01	fpsyg-12-601849	Completed	20:25:14	Buvanenthiran P	Divya A	2	Santhosh Kumar L	2021-04-01 20:25:41	2021-04-01 20:28:57																												01-Apr-2021		01-Apr-2021
1	2021-04-01	fvets-08-644738	Completed	20:35:10	Sathya R	Janani M	5	Gowtham M	2021-04-01 20:45:51	2021-04-01 20:50:17																												01-Apr-2021		01-Apr-2021
1	2021-04-01	fpsyg-12-643670	Completed	20:35:27	Priyadharshini S	Kalaivani R	10	Gowtham M	2021-04-01 21:12:59	2021-04-01 21:18:34																												01-Apr-2021		01-Apr-2021
1	2021-04-01	fnut-08-639425	Completed	20:37:01	Mahalingam K	Sridhar G	7	Santhosh Kumar L	2021-04-01 20:38:36	2021-04-01 20:47:10																												01-Apr-2021		01-Apr-2021
1	2021-04-01	fpsyg-12-644036	Completed	20:45:54	Gowrishankar S	Janani K	3	Santhosh Kumar L	2021-04-01 20:47:16	2021-04-01 21:00:57																												01-Apr-2021		01-Apr-2021
1	2021-04-01	fpsyt-12-669387	Completed	20:51:54	Sathya R	SenthilKumar P	3	Gowtham M	2021-04-01 21:22:18	2021-04-01 21:28:13																												01-Apr-2021		01-Apr-2021
1	2021-04-01	fcvm-08-638954	Completed	21:06:21	Priyadharshini S	Saravanavel Murugan P	2	Gowtham M	2021-04-01 21:18:39	2021-04-01 21:22:07																												01-Apr-2021		01-Apr-2021
1	2021-04-01	fpos-03-643134	Completed	21:12:32	Siva Sankar Narayanan M	Kalaivani R	5	Santhosh Kumar L	2021-04-01 21:20:33	2021-04-01 21:27:40																												01-Apr-2021		01-Apr-2021
1	2021-04-01	fpsyg-12-641895	Completed	21:25:57	Jeyaseelan R	Durga B	4	Gowtham M	2021-04-01 21:28:25	2021-04-01 21:38:49																												01-Apr-2021		01-Apr-2021
1	2021-04-01	fpsyg-12-646435	Completed	21:29:14	Buvanenthiran P	Sumithra P	4	Santhosh Kumar L	2021-04-01 21:30:07	2021-04-01 21:33:02																												01-Apr-2021		01-Apr-2021
1	2021-04-01	fnagi-13-617611	Completed	21:29:46	Priyadharshini S	Nathiya S	10	Gowtham M	2021-04-01 21:47:20	2021-04-01 21:49:49																												01-Apr-2021		01-Apr-2021
1	2021-04-01	fpubh-09-658830	Completed	21:36:49	Siva Sankar Narayanan M	Saravanavel Murugan P	5	Santhosh Kumar L	2021-04-01 21:39:09	2021-04-01 21:42:42																												01-Apr-2021		01-Apr-2021
1	2021-04-01	fpsyt-12-557611	Completed	21:42:42	Buvanenthiran P	Janani M	2	Santhosh Kumar L	2021-04-01 21:43:43	2021-04-01 21:44:48																												01-Apr-2021		01-Apr-2021
1	2021-04-01	fpsyg-12-671072	Completed	21:50:49	Gowrishankar S	Aswini M	8	Santhosh Kumar L	2021-04-01 21:51:45	2021-04-01 21:59:29																												01-Apr-2021		01-Apr-2021
1	2021-04-02	fnut-08-588466	Completed	07:05:57	Muthulakshmi R	Muthu Kumar M	6	Usha Nandhini S	2021-04-02 07:08:44	2021-04-02 08:33:23																												02-Apr-2021		02-Apr-2021
1	2021-04-02	fpubh-09-615597	Completed	07:13:17	Gowthami L	Saravanavel Murugan P	5	Maheswari D	2021-04-02 07:14:34	2021-04-02 07:31:16																												02-Apr-2021		02-Apr-2021
1	2021-04-02	fpsyg-12-594391	Completed	07:27:10	Uma Y	Kalaivani R	5	Maheswari D	2021-04-02 07:31:38	2021-04-02 10:10:54																												02-Apr-2021		02-Apr-2021
1	2021-04-02	fspas-08-638489	Cor inprocess	07:32:16	Gowthami L	Saravanavel Murugan P	5	Maheswari D	2021-04-02 10:11:05																													02-Apr-2021		02-Apr-2021
1	2021-04-02	fspas-08-655309	Completed	07:54:56	Prakash A	SenthilKumar P	4	Usha Nandhini S	2021-04-02 08:33:36	2021-04-02 08:39:34																												02-Apr-2021		02-Apr-2021
1	2021-04-02	fbuil-07-676584	Completed	08:04:00	Siva Sankar Narayanan M	Gopala Krishnan R	4	Usha Nandhini S	2021-04-02 09:29:31	2021-04-02 09:32:00																												02-Apr-2021		02-Apr-2021
1	2021-04-02	fpubh-09-652876	Completed	08:07:02	Muthulakshmi R	Saravanavel Murugan P	5	Usha Nandhini S	2021-04-02 08:39:44	2021-04-02 08:48:11																												02-Apr-2021		02-Apr-2021
1	2021-04-02	fsurg-08-624124	Completed	08:10:23	Siva Sankar Narayanan M	Gopala Krishnan R	3	Maheswari D	2021-04-02 08:48:50	2021-04-02 08:53:48																												02-Apr-2021		02-Apr-2021
1	2021-04-02	fcell-09-647058	Completed	08:25:30	Uma Y	Kalaivani R	8	Maheswari D	2021-04-02 10:19:21	2021-04-02 10:26:49																												02-Apr-2021		02-Apr-2021
1	2021-04-02	fpls-12-637488	Completed	08:51:06	Siva Sankar Narayanan M	Gopala Krishnan R	5	Usha Nandhini S	2021-04-02 09:36:55	2021-04-02 09:42:57																												02-Apr-2021		02-Apr-2021
1	2021-04-02	fonc-11-641931	Completed	08:58:03	Muthulakshmi R	Saravanavel Murugan P	2	Usha Nandhini S	2021-04-02 09:15:02	2021-04-02 09:18:29																												02-Apr-2021		02-Apr-2021
1	2021-04-02	fclim-03-656505	Completed	09:14:56	Prakash A	Durga B	4	Usha Nandhini S	2021-04-02 09:23:51	2021-04-02 09:28:56																												02-Apr-2021		02-Apr-2021
1	2021-04-02	fpsyg-12-627841	Cor inprocess	09:20:01	Uma Y	Kalaivani R	8																															02-Apr-2021		00-Jan-1900
1	2021-04-02	fpsyg-12-616855	Completed	09:37:43	Siva Sankar Narayanan M	Divya A	5	Usha Nandhini S	2021-04-02 09:43:39	2021-04-02 09:57:45																												02-Apr-2021		02-Apr-2021
1	2021-04-02	fvets-08-658265	Completed	10:04:24	Siva Sankar Narayanan M	Janani M	5	Usha Nandhini S	2021-04-02 10:08:20	2021-04-02 10:14:27																												02-Apr-2021		02-Apr-2021
1	2021-04-02	frsc-03-644231	Cor inprocess	10:05:13	Renganath K	Janani M	10																															02-Apr-2021		00-Jan-1900
1	2021-04-02	fspor-03-557849	Cor inprocess	10:05:13	Gowthami L	Janani K	10																															02-Apr-2021		00-Jan-1900
1	2021-04-02	fmed-08-639758	Completed	10:10:51	Gowthami L	Janani K	1	Maheswari D	2021-04-02 10:13:43	2021-04-02 10:16:44																												02-Apr-2021		02-Apr-2021
1	2021-04-02	fcosc-02-652415	Completed	10:15:49	Prakash A	Janani K	5	Usha Nandhini S	2021-04-02 10:16:37	2021-04-02 10:45:39																												02-Apr-2021		02-Apr-2021
1	2021-04-02	fneur-12-627824	Cor inprocess	10:19:56	Gowthami L	Janani K	2																															02-Apr-2021		00-Jan-1900
1	2021-04-02	fspas-08-639068	Completed	10:24:06	Dinesh Kumar M	Sumithra P	2	Usha Nandhini S	2021-04-02 10:25:23	2021-04-02 10:39:51																												02-Apr-2021		02-Apr-2021
1	2021-04-02	frobt-08-576783	Cor inprocess	10:26:01	Muthulakshmi R	Saravanavel Murugan P	2	Usha Nandhini S	2021-04-02 10:45:46																													02-Apr-2021		02-Apr-2021
1	2021-04-02	fphy-09-637964	Cor inprocess	10:49:27	Dinesh Kumar M	Aswini M	3																															02-Apr-2021		00-Jan-1900
